# Supplementary material for: HIV-1 T cell epitopes targeted to Rhesus macaque CD40 and DCIR: A comparative study of prototype dendritic cell targeting therapeutic vaccine candidates
Source: PubMed Central journal article supplement (PMC6267996; doi:10.1371/journal.pone.0207794), 2018-11-30
Supplement: pone.0207794.s002.pdf [file pone.0207794.s002.pdf]

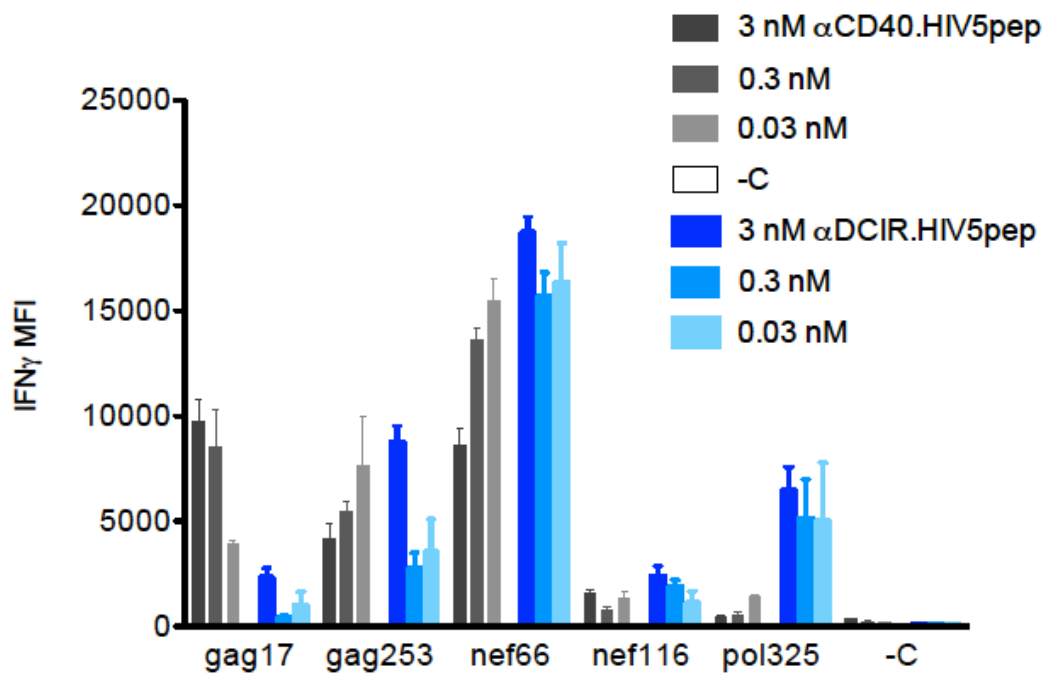

**S2 Fig. Humanized  $\alpha$ CD40 HIV5pep and  $\alpha$ DCIR HIV5pep vaccines expand a similar range of HIV-1-specific T cells.** PBMCs from an HIV-1-infected individual were cultured for 10 days with a dose range from 30 pM to 3 nM of  $\alpha$ CD40.HIV5pep (black-grey filled bars), 30 pM to 3 nM of  $\alpha$ DCIR.HIV5pep (dark blue-light blue bars), or left unstimulated and then restimulated (C-) for 48 hours with or without 19-32 residue long peptides covering the specified HIV-1 Gag, Nef and Pol long peptide regions. The culture supernatants were then harvested and the total T cell secreted IFN $\gamma$  was analyzed by multiplex bead-based assay. The error bars are the standard error of the mean of replicates.
