# Supplementary material for: HIV-1 T cell epitopes targeted to Rhesus macaque CD40 and DCIR: A comparative study of prototype dendritic cell targeting therapeutic vaccine candidates
Source: PubMed Central journal article supplement (PMC6267996; doi:10.1371/journal.pone.0207794), 2018-11-30
Supplement: pone.0207794.s003.pdf [file pone.0207794.s003.pdf]

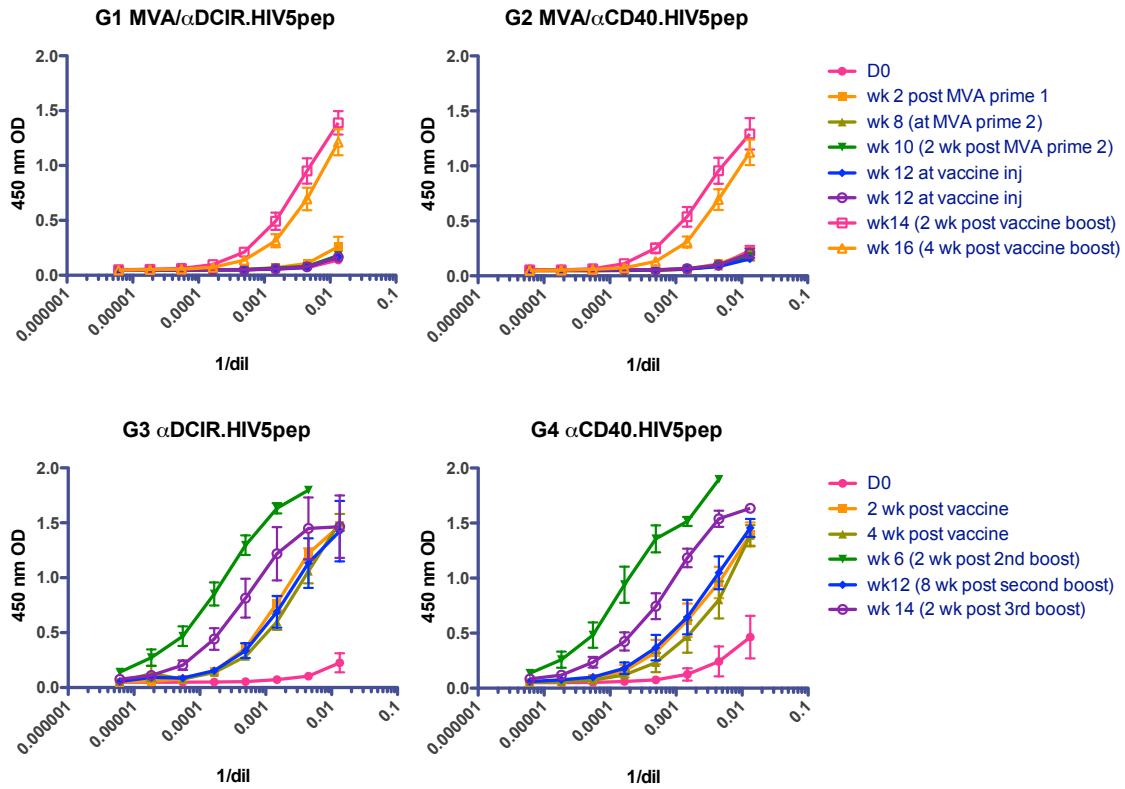

**S3 Fig. Titration curves used for the calculation of the serum antibody response presented in Fig 6.** These data are for weeks 0-16 in G1 and G2, and for weeks 0-14 in G3 and G4. Vaccine or vaccine inj refer to administration of the DC-targeting vaccines with adjuvant. The raw data for this graph is contained in [S6 Table](#).
