# Supplementary material for: HIV-1 T cell epitopes targeted to Rhesus macaque CD40 and DCIR: A comparative study of prototype dendritic cell targeting therapeutic vaccine candidates
Source: PubMed Central journal article supplement (PMC6267996; doi:10.1371/journal.pone.0207794), 2018-11-30
Supplement: pone.0207794.s004.pdf [file pone.0207794.s004.pdf]

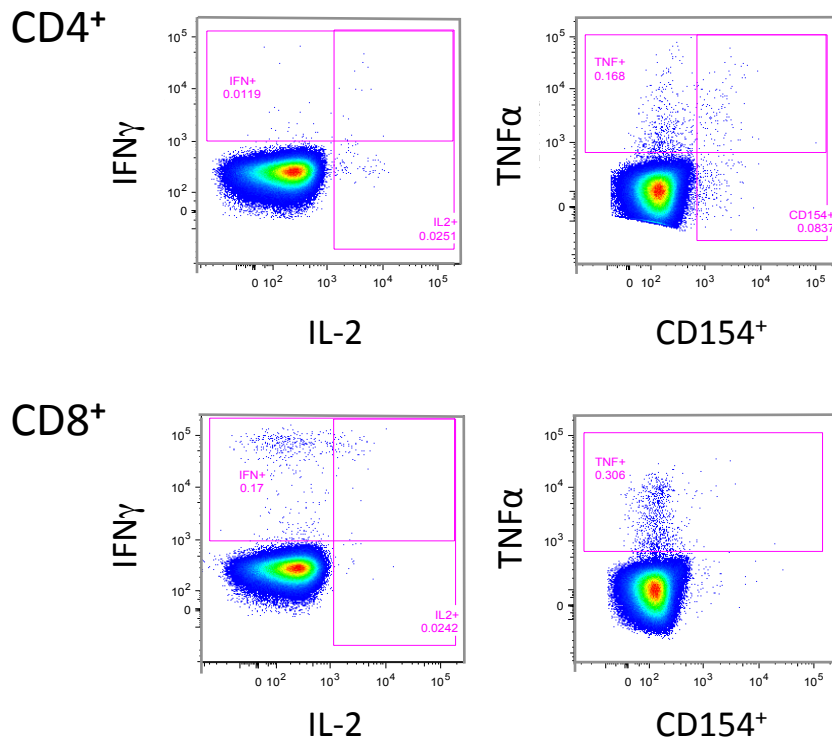

**S4 Fig. Flow cytometric analysis of intracellular staining analysis for Gag p24-specific IL-2, TNF $\alpha$  and IFN $\gamma$ -producing CD4<sup>+</sup> and CD8<sup>+</sup> T cells.** Cryopreserved cells were stimulated with peptide pools (2  $\mu$ g/ml) in the presence of Brefeldin A for 6 h. Intracellular cytokine staining was performed (see Methods) and analyzed by flow cytometry. Upper two panels are CD4<sup>+</sup> T cells and the lower two panels are CD8<sup>+</sup> T cells. The annotated quadrants indicate the gates used to quantify % cytokine positive cells.
