# Supplementary material for: HIV-1 T cell epitopes targeted to Rhesus macaque CD40 and DCIR: A comparative study of prototype dendritic cell targeting therapeutic vaccine candidates
Source: PubMed Central journal article supplement (PMC6267996; doi:10.1371/journal.pone.0207794), 2018-11-30
Supplement: pone.0207794.s005.pdf [file pone.0207794.s005.pdf]

**S1 Table. IFN $\gamma$  ELISPOT data using pools of overlapping Gag, Pol and Nef peptides corresponding to sequences carried by the DC-targeting vector or specifically by the MVA vector.** This table is the data that relates to [Fig 2](#) (G1 and G2) and [Fig 3](#) (G3 and G4) panels A and B. Animal name, group, DC-targeting peptides or MVA-specific peptides and sample time in weeks are identified. The values are the sum of spots for each peptide set.

| Animal | Group       | Type of peptides          | Sample Time | Spots per 1 <sup>6</sup> |
|--------|-------------|---------------------------|-------------|--------------------------|
| R370   | G1 MVA DCIR | DC-Targeting peptites     | Wk0         | 0                        |
| R371   | G1 MVA DCIR | DC-Targeting peptites     | Wk0         | 10                       |
| R373   | G1 MVA DCIR | DC-Targeting peptites     | Wk0         | 25                       |
| R374   | G1 MVA DCIR | DC-Targeting peptites     | Wk0         | 40                       |
| R369   | G1 MVA DCIR | DC-Targeting peptites     | Wk0         | 15                       |
| R385   | G1 MVA DCIR | DC-Targeting peptites     | Wk0         | 5                        |
| R370   | G1 MVA DCIR | Non DC-Targeting peptites | Wk0         | 0                        |
| R371   | G1 MVA DCIR | Non DC-Targeting peptites | Wk0         | 20                       |
| R373   | G1 MVA DCIR | Non DC-Targeting peptites | Wk0         | 30                       |
| R374   | G1 MVA DCIR | Non DC-Targeting peptites | Wk0         | 40                       |
| R369   | G1 MVA DCIR | Non DC-Targeting peptites | Wk0         | 10                       |
| R385   | G1 MVA DCIR | Non DC-Targeting peptites | Wk0         | 5                        |
| R370   | G1 MVA DCIR | DC-Targeting peptites     | Wk2         | 0                        |
| R371   | G1 MVA DCIR | DC-Targeting peptites     | Wk2         | 45                       |
| R373   | G1 MVA DCIR | DC-Targeting peptites     | Wk2         | 0                        |
| R374   | G1 MVA DCIR | DC-Targeting peptites     | Wk2         | 30                       |
| R369   | G1 MVA DCIR | DC-Targeting peptites     | Wk2         | 120                      |
| R385   | G1 MVA DCIR | DC-Targeting peptites     | Wk2         | 25                       |
| R370   | G1 MVA DCIR | Non DC-Targeting peptites | Wk2         | 5                        |
| R371   | G1 MVA DCIR | Non DC-Targeting peptites | Wk2         | 5                        |
| R373   | G1 MVA DCIR | Non DC-Targeting peptites | Wk2         | 15                       |
| R374   | G1 MVA DCIR | Non DC-Targeting peptites | Wk2         | 45                       |
| R369   | G1 MVA DCIR | Non DC-Targeting peptites | Wk2         | 170                      |
| R385   | G1 MVA DCIR | Non DC-Targeting peptites | Wk2         | 5                        |
| R370   | G1 MVA DCIR | DC-Targeting peptites     | Wk10        | 15                       |
| R371   | G1 MVA DCIR | DC-Targeting peptites     | Wk10        | 20                       |
| R373   | G1 MVA DCIR | DC-Targeting peptites     | Wk10        | 35                       |
| R374   | G1 MVA DCIR | DC-Targeting peptites     | Wk10        | 50                       |
| R369   | G1 MVA DCIR | DC-Targeting peptites     | Wk10        | 65                       |

|      |             |                           |      |      |
|------|-------------|---------------------------|------|------|
| R385 | G1 MVA DCIR | DC-Targeting peptites     | Wk10 | 30   |
| R370 | G1 MVA DCIR | Non DC-Targeting peptites | Wk10 | 15   |
| R371 | G1 MVA DCIR | Non DC-Targeting peptites | Wk10 | 200  |
| R373 | G1 MVA DCIR | Non DC-Targeting peptites | Wk10 | 30   |
| R374 | G1 MVA DCIR | Non DC-Targeting peptites | Wk10 | 95   |
| R369 | G1 MVA DCIR | Non DC-Targeting peptites | Wk10 | 160  |
| R385 | G1 MVA DCIR | Non DC-Targeting peptites | Wk10 | 115  |
| R370 | G1 MVA DCIR | DC-Targeting peptites     | Wk12 | 20   |
| R371 | G1 MVA DCIR | DC-Targeting peptites     | Wk12 | 25   |
| R373 | G1 MVA DCIR | DC-Targeting peptites     | Wk12 | 25   |
| R374 | G1 MVA DCIR | DC-Targeting peptites     | Wk12 | 40   |
| R369 | G1 MVA DCIR | DC-Targeting peptites     | Wk12 | 10   |
| R385 | G1 MVA DCIR | DC-Targeting peptites     | Wk12 | 10   |
| R370 | G1 MVA DCIR | Non DC-Targeting peptites | Wk12 | 25   |
| R371 | G1 MVA DCIR | Non DC-Targeting peptites | Wk12 | 105  |
| R373 | G1 MVA DCIR | Non DC-Targeting peptites | Wk12 | 90   |
| R374 | G1 MVA DCIR | Non DC-Targeting peptites | Wk12 | 55   |
| R369 | G1 MVA DCIR | Non DC-Targeting peptites | Wk12 | 15   |
| R385 | G1 MVA DCIR | Non DC-Targeting peptites | Wk12 | 20   |
| R370 | G1 MVA DCIR | DC-Targeting peptites     | Wk14 | 20   |
| R371 | G1 MVA DCIR | DC-Targeting peptites     | Wk14 | 190  |
| R373 | G1 MVA DCIR | DC-Targeting peptites     | Wk14 | 20   |
| R374 | G1 MVA DCIR | DC-Targeting peptites     | Wk14 | 320  |
| R369 | G1 MVA DCIR | DC-Targeting peptites     | Wk14 | 605  |
| R385 | G1 MVA DCIR | DC-Targeting peptites     | Wk14 | 55   |
| R370 | G1 MVA DCIR | Non DC-Targeting peptites | Wk14 | 25   |
| R371 | G1 MVA DCIR | Non DC-Targeting peptites | Wk14 | 40   |
| R373 | G1 MVA DCIR | Non DC-Targeting peptites | Wk14 | 10   |
| R374 | G1 MVA DCIR | Non DC-Targeting peptites | Wk14 | 60   |
| R369 | G1 MVA DCIR | Non DC-Targeting peptites | Wk14 | 50   |
| R385 | G1 MVA DCIR | Non DC-Targeting peptites | Wk14 | 15   |
| R370 | G1 MVA DCIR | DC-Targeting peptites     | Wk18 | 55   |
| R371 | G1 MVA DCIR | DC-Targeting peptites     | Wk18 | 560  |
| R373 | G1 MVA DCIR | DC-Targeting peptites     | Wk18 | 130  |
| R374 | G1 MVA DCIR | DC-Targeting peptites     | Wk18 | 380  |
| R369 | G1 MVA DCIR | DC-Targeting peptites     | Wk18 | 1640 |
| R385 | G1 MVA DCIR | DC-Targeting peptites     | Wk18 | 670  |
| R370 | G1 MVA DCIR | Non DC-Targeting peptites | Wk18 | 0    |
| R371 | G1 MVA DCIR | Non DC-Targeting peptites | Wk18 | 55   |
| R373 | G1 MVA DCIR | Non DC-Targeting peptites | Wk18 | 15   |
| R374 | G1 MVA DCIR | Non DC-Targeting peptites | Wk18 | 10   |
| R369 | G1 MVA DCIR | Non DC-Targeting peptites | Wk18 | 150  |
| R385 | G1 MVA DCIR | Non DC-Targeting peptites | Wk18 | 50   |

|      |             |                           |      |      |
|------|-------------|---------------------------|------|------|
| R370 | G1 MVA DCIR | DC-Targeting peptites     | Wk26 | 70   |
| R371 | G1 MVA DCIR | DC-Targeting peptites     | Wk26 | 1000 |
| R373 | G1 MVA DCIR | DC-Targeting peptites     | Wk26 | 150  |
| R374 | G1 MVA DCIR | DC-Targeting peptites     | Wk26 | 240  |
| R369 | G1 MVA DCIR | DC-Targeting peptites     | Wk26 | 950  |
| R385 | G1 MVA DCIR | DC-Targeting peptites     | Wk26 | 475  |
| R370 | G1 MVA DCIR | Non DC-Targeting peptites | Wk26 | 0    |
| R371 | G1 MVA DCIR | Non DC-Targeting peptites | Wk26 | 105  |
| R373 | G1 MVA DCIR | Non DC-Targeting peptites | Wk26 | 20   |
| R374 | G1 MVA DCIR | Non DC-Targeting peptites | Wk26 | 20   |
| R369 | G1 MVA DCIR | Non DC-Targeting peptites | Wk26 | 120  |
| R385 | G1 MVA DCIR | Non DC-Targeting peptites | Wk26 | 40   |
| R370 | G1 MVA DCIR | DC-Targeting peptites     | Wk28 | 75   |
| R371 | G1 MVA DCIR | DC-Targeting peptites     | Wk28 | 715  |
| R373 | G1 MVA DCIR | DC-Targeting peptites     | Wk28 | 130  |
| R374 | G1 MVA DCIR | DC-Targeting peptites     | Wk28 | 485  |
| R369 | G1 MVA DCIR | DC-Targeting peptites     | Wk28 | 960  |
| R385 | G1 MVA DCIR | DC-Targeting peptites     | Wk28 | 450  |
| R370 | G1 MVA DCIR | Non DC-Targeting peptites | Wk28 | 30   |
| R371 | G1 MVA DCIR | Non DC-Targeting peptites | Wk28 | 85   |
| R373 | G1 MVA DCIR | Non DC-Targeting peptites | Wk28 | 15   |
| R374 | G1 MVA DCIR | Non DC-Targeting peptites | Wk28 | 50   |
| R369 | G1 MVA DCIR | Non DC-Targeting peptites | Wk28 | 55   |
| R385 | G1 MVA DCIR | Non DC-Targeting peptites | Wk28 | 65   |
| R376 | G2 MVA CD40 | DC-Targeting peptites     | Wk0  | 0    |
| R377 | G2 MVA CD40 | DC-Targeting peptites     | Wk0  | 60   |
| R378 | G2 MVA CD40 | DC-Targeting peptites     | Wk0  | 15   |
| R380 | G2 MVA CD40 | DC-Targeting peptites     | Wk0  | 15   |
| R382 | G2 MVA CD40 | DC-Targeting peptites     | Wk0  | 5    |
| R384 | G2 MVA CD40 | DC-Targeting peptites     | Wk0  | 0    |
| R376 | G2 MVA CD40 | Non DC-Targeting peptites | Wk0  | 5    |
| R377 | G2 MVA CD40 | Non DC-Targeting peptites | Wk0  | 70   |
| R378 | G2 MVA CD40 | Non DC-Targeting peptites | Wk0  | 35   |
| R380 | G2 MVA CD40 | Non DC-Targeting peptites | Wk0  | 0    |
| R382 | G2 MVA CD40 | Non DC-Targeting peptites | Wk0  | 15   |
| R384 | G2 MVA CD40 | Non DC-Targeting peptites | Wk0  | 5    |
| R376 | G2 MVA CD40 | DC-Targeting peptites     | Wk2  | 25   |
| R377 | G2 MVA CD40 | DC-Targeting peptites     | Wk2  | 285  |
| R378 | G2 MVA CD40 | DC-Targeting peptites     | Wk2  | 0    |
| R380 | G2 MVA CD40 | DC-Targeting peptites     | Wk2  | 10   |
| R382 | G2 MVA CD40 | DC-Targeting peptites     | Wk2  | 145  |
| R384 | G2 MVA CD40 | DC-Targeting peptites     | Wk2  | 40   |
| R376 | G2 MVA CD40 | Non DC-Targeting peptites | Wk2  | 35   |

|      |             |                           |      |      |
|------|-------------|---------------------------|------|------|
| R377 | G2 MVA CD40 | Non DC-Targeting peptites | Wk2  | 20   |
| R378 | G2 MVA CD40 | Non DC-Targeting peptites | Wk2  | 0    |
| R380 | G2 MVA CD40 | Non DC-Targeting peptites | Wk2  | 0    |
| R382 | G2 MVA CD40 | Non DC-Targeting peptites | Wk2  | 120  |
| R384 | G2 MVA CD40 | Non DC-Targeting peptites | Wk2  | 25   |
| R376 | G2 MVA CD40 | DC-Targeting peptites     | Wk10 | 0    |
| R377 | G2 MVA CD40 | DC-Targeting peptites     | Wk10 | 85   |
| R378 | G2 MVA CD40 | DC-Targeting peptites     | Wk10 | 20   |
| R380 | G2 MVA CD40 | DC-Targeting peptites     | Wk10 | 50   |
| R382 | G2 MVA CD40 | DC-Targeting peptites     | Wk10 | 45   |
| R384 | G2 MVA CD40 | DC-Targeting peptites     | Wk10 | 0    |
| R376 | G2 MVA CD40 | Non DC-Targeting peptites | Wk10 | 140  |
| R377 | G2 MVA CD40 | Non DC-Targeting peptites | Wk10 | 45   |
| R378 | G2 MVA CD40 | Non DC-Targeting peptites | Wk10 | 45   |
| R380 | G2 MVA CD40 | Non DC-Targeting peptites | Wk10 | 85   |
| R382 | G2 MVA CD40 | Non DC-Targeting peptites | Wk10 | 0    |
| R384 | G2 MVA CD40 | Non DC-Targeting peptites | Wk10 | 10   |
| R376 | G2 MVA CD40 | DC-Targeting peptites     | Wk12 | 15   |
| R377 | G2 MVA CD40 | DC-Targeting peptites     | Wk12 | 10   |
| R378 | G2 MVA CD40 | DC-Targeting peptites     | Wk12 | 0    |
| R380 | G2 MVA CD40 | DC-Targeting peptites     | Wk12 | 10   |
| R382 | G2 MVA CD40 | DC-Targeting peptites     | Wk12 | 135  |
| R384 | G2 MVA CD40 | DC-Targeting peptites     | Wk12 | 130  |
| R376 | G2 MVA CD40 | Non DC-Targeting peptites | Wk12 | 100  |
| R377 | G2 MVA CD40 | Non DC-Targeting peptites | Wk12 | 20   |
| R378 | G2 MVA CD40 | Non DC-Targeting peptites | Wk12 | 0    |
| R380 | G2 MVA CD40 | Non DC-Targeting peptites | Wk12 | 95   |
| R382 | G2 MVA CD40 | Non DC-Targeting peptites | Wk12 | 60   |
| R384 | G2 MVA CD40 | Non DC-Targeting peptites | Wk12 | 45   |
| R376 | G2 MVA CD40 | DC-Targeting peptites     | Wk14 | 85   |
| R377 | G2 MVA CD40 | DC-Targeting peptites     | Wk14 | 1060 |
| R378 | G2 MVA CD40 | DC-Targeting peptites     | Wk14 | 180  |
| R380 | G2 MVA CD40 | DC-Targeting peptites     | Wk14 | 385  |
| R382 | G2 MVA CD40 | DC-Targeting peptites     | Wk14 | 510  |
| R384 | G2 MVA CD40 | DC-Targeting peptites     | Wk14 | 275  |
| R376 | G2 MVA CD40 | Non DC-Targeting peptites | Wk14 | 50   |
| R377 | G2 MVA CD40 | Non DC-Targeting peptites | Wk14 | 0    |
| R378 | G2 MVA CD40 | Non DC-Targeting peptites | Wk14 | 20   |
| R380 | G2 MVA CD40 | Non DC-Targeting peptites | Wk14 | 0    |
| R382 | G2 MVA CD40 | Non DC-Targeting peptites | Wk14 | 15   |
| R384 | G2 MVA CD40 | Non DC-Targeting peptites | Wk14 | 40   |
| R376 | G2 MVA CD40 | DC-Targeting peptites     | Wk18 | 440  |
| R377 | G2 MVA CD40 | DC-Targeting peptites     | Wk18 | 1815 |

|      |             |                           |      |      |
|------|-------------|---------------------------|------|------|
| R378 | G2 MVA CD40 | DC-Targeting peptites     | Wk18 | 1060 |
| R380 | G2 MVA CD40 | DC-Targeting peptites     | Wk18 | 925  |
| R382 | G2 MVA CD40 | DC-Targeting peptites     | Wk18 | 1035 |
| R384 | G2 MVA CD40 | DC-Targeting peptites     | Wk18 | 405  |
| R376 | G2 MVA CD40 | Non DC-Targeting peptites | Wk18 | 55   |
| R377 | G2 MVA CD40 | Non DC-Targeting peptites | Wk18 | 30   |
| R378 | G2 MVA CD40 | Non DC-Targeting peptites | Wk18 | 80   |
| R380 | G2 MVA CD40 | Non DC-Targeting peptites | Wk18 | 95   |
| R382 | G2 MVA CD40 | Non DC-Targeting peptites | Wk18 | 35   |
| R384 | G2 MVA CD40 | Non DC-Targeting peptites | Wk18 | 80   |
| R376 | G2 MVA CD40 | DC-Targeting peptites     | Wk26 | 375  |
| R377 | G2 MVA CD40 | DC-Targeting peptites     | Wk26 | 1560 |
| R378 | G2 MVA CD40 | DC-Targeting peptites     | Wk26 | 435  |
| R380 | G2 MVA CD40 | DC-Targeting peptites     | Wk26 | 355  |
| R382 | G2 MVA CD40 | DC-Targeting peptites     | Wk26 | 720  |
| R384 | G2 MVA CD40 | DC-Targeting peptites     | Wk26 | 580  |
| R376 | G2 MVA CD40 | Non DC-Targeting peptites | Wk26 | 90   |
| R377 | G2 MVA CD40 | Non DC-Targeting peptites | Wk26 | 140  |
| R378 | G2 MVA CD40 | Non DC-Targeting peptites | Wk26 | 25   |
| R380 | G2 MVA CD40 | Non DC-Targeting peptites | Wk26 | 55   |
| R382 | G2 MVA CD40 | Non DC-Targeting peptites | Wk26 | 10   |
| R384 | G2 MVA CD40 | Non DC-Targeting peptites | Wk26 | 20   |
| R376 | G2 MVA CD40 | DC-Targeting peptites     | Wk28 | 115  |
| R377 | G2 MVA CD40 | DC-Targeting peptites     | Wk28 | 1555 |
| R378 | G2 MVA CD40 | DC-Targeting peptites     | Wk28 | 400  |
| R380 | G2 MVA CD40 | DC-Targeting peptites     | Wk28 | 725  |
| R382 | G2 MVA CD40 | DC-Targeting peptites     | Wk28 | 770  |
| R384 | G2 MVA CD40 | DC-Targeting peptites     | Wk28 | 1015 |
| R376 | G2 MVA CD40 | Non DC-Targeting peptites | Wk28 | 25   |
| R377 | G2 MVA CD40 | Non DC-Targeting peptites | Wk28 | 230  |
| R378 | G2 MVA CD40 | Non DC-Targeting peptites | Wk28 | 60   |
| R380 | G2 MVA CD40 | Non DC-Targeting peptites | Wk28 | 40   |
| R382 | G2 MVA CD40 | Non DC-Targeting peptites | Wk28 | 65   |
| R384 | G2 MVA CD40 | Non DC-Targeting peptites | Wk28 | 10   |
| R368 | G3 DCIR MVA | DC-Targeting peptites     | Wk0  | 5    |
| R375 | G3 DCIR MVA | DC-Targeting peptites     | Wk0  | 0    |
| R379 | G3 DCIR MVA | DC-Targeting peptites     | Wk0  | 10   |
| R381 | G3 DCIR MVA | DC-Targeting peptites     | Wk0  | 155  |
| R387 | G3 DCIR MVA | DC-Targeting peptites     | Wk0  | 0    |
| R388 | G3 DCIR MVA | DC-Targeting peptites     | Wk0  | 130  |
| R368 | G3 DCIR MVA | Non DC-Targeting peptites | Wk0  | 25   |
| R375 | G3 DCIR MVA | Non DC-Targeting peptites | Wk0  | 0    |
| R379 | G3 DCIR MVA | Non DC-Targeting peptites | Wk0  | 10   |

|      |             |                           |      |     |
|------|-------------|---------------------------|------|-----|
| R381 | G3 DCIR MVA | Non DC-Targeting peptites | Wk0  | 0   |
| R387 | G3 DCIR MVA | Non DC-Targeting peptites | Wk0  | 0   |
| R388 | G3 DCIR MVA | Non DC-Targeting peptites | Wk0  | 0   |
| R368 | G3 DCIR MVA | DC-Targeting peptites     | Wk2  | 0   |
| R375 | G3 DCIR MVA | DC-Targeting peptites     | Wk2  | 60  |
| R379 | G3 DCIR MVA | DC-Targeting peptites     | Wk2  | 20  |
| R381 | G3 DCIR MVA | DC-Targeting peptites     | Wk2  | 60  |
| R387 | G3 DCIR MVA | DC-Targeting peptites     | Wk2  | 10  |
| R388 | G3 DCIR MVA | DC-Targeting peptites     | Wk2  | 45  |
| R368 | G3 DCIR MVA | Non DC-Targeting peptites | Wk2  | 0   |
| R375 | G3 DCIR MVA | Non DC-Targeting peptites | Wk2  | 35  |
| R379 | G3 DCIR MVA | Non DC-Targeting peptites | Wk2  | 15  |
| R381 | G3 DCIR MVA | Non DC-Targeting peptites | Wk2  | 50  |
| R387 | G3 DCIR MVA | Non DC-Targeting peptites | Wk2  | 0   |
| R388 | G3 DCIR MVA | Non DC-Targeting peptites | Wk2  | 5   |
| R368 | G3 DCIR MVA | DC-Targeting peptites     | Wk6  | 60  |
| R375 | G3 DCIR MVA | DC-Targeting peptites     | Wk6  | 150 |
| R379 | G3 DCIR MVA | DC-Targeting peptites     | Wk6  | 455 |
| R381 | G3 DCIR MVA | DC-Targeting peptites     | Wk6  | 280 |
| R387 | G3 DCIR MVA | DC-Targeting peptites     | Wk6  | 40  |
| R388 | G3 DCIR MVA | DC-Targeting peptites     | Wk6  | 45  |
| R368 | G3 DCIR MVA | Non DC-Targeting peptites | Wk6  | 5   |
| R375 | G3 DCIR MVA | Non DC-Targeting peptites | Wk6  | 55  |
| R379 | G3 DCIR MVA | Non DC-Targeting peptites | Wk6  | 85  |
| R381 | G3 DCIR MVA | Non DC-Targeting peptites | Wk6  | 1   |
| R387 | G3 DCIR MVA | Non DC-Targeting peptites | Wk6  | 0   |
| R388 | G3 DCIR MVA | Non DC-Targeting peptites | Wk6  | 15  |
| R368 | G3 DCIR MVA | DC-Targeting peptites     | Wk14 | 110 |
| R375 | G3 DCIR MVA | DC-Targeting peptites     | Wk14 | 425 |
| R379 | G3 DCIR MVA | DC-Targeting peptites     | Wk14 | 595 |
| R381 | G3 DCIR MVA | DC-Targeting peptites     | Wk14 | 155 |
| R387 | G3 DCIR MVA | DC-Targeting peptites     | Wk14 | 0   |
| R388 | G3 DCIR MVA | DC-Targeting peptites     | Wk14 | 140 |
| R368 | G3 DCIR MVA | Non DC-Targeting peptites | Wk14 | 15  |
| R375 | G3 DCIR MVA | Non DC-Targeting peptites | Wk14 | 45  |
| R379 | G3 DCIR MVA | Non DC-Targeting peptites | Wk14 | 10  |
| R381 | G3 DCIR MVA | Non DC-Targeting peptites | Wk14 | 0   |
| R387 | G3 DCIR MVA | Non DC-Targeting peptites | Wk14 | 0   |
| R388 | G3 DCIR MVA | Non DC-Targeting peptites | Wk14 | 0   |
| R368 | G3 DCIR MVA | DC-Targeting peptites     | Wk22 | 100 |
| R375 | G3 DCIR MVA | DC-Targeting peptites     | Wk22 | 280 |
| R379 | G3 DCIR MVA | DC-Targeting peptites     | Wk22 | 765 |
| R381 | G3 DCIR MVA | DC-Targeting peptites     | Wk22 | 210 |

|      |             |                           |      |     |
|------|-------------|---------------------------|------|-----|
| R387 | G3 DCIR MVA | DC-Targeting peptites     | Wk22 | 0   |
| R388 | G3 DCIR MVA | DC-Targeting peptites     | Wk22 | 90  |
| R368 | G3 DCIR MVA | Non DC-Targeting peptites | Wk22 | 80  |
| R375 | G3 DCIR MVA | Non DC-Targeting peptites | Wk22 | 25  |
| R379 | G3 DCIR MVA | Non DC-Targeting peptites | Wk22 | 30  |
| R381 | G3 DCIR MVA | Non DC-Targeting peptites | Wk22 | 20  |
| R387 | G3 DCIR MVA | Non DC-Targeting peptites | Wk22 | 0   |
| R388 | G3 DCIR MVA | Non DC-Targeting peptites | Wk22 | 25  |
| R368 | G3 DCIR MVA | DC-Targeting peptites     | Wk24 | 65  |
| R375 | G3 DCIR MVA | DC-Targeting peptites     | Wk24 | 310 |
| R379 | G3 DCIR MVA | DC-Targeting peptites     | Wk24 | 475 |
| R381 | G3 DCIR MVA | DC-Targeting peptites     | Wk24 | 300 |
| R387 | G3 DCIR MVA | DC-Targeting peptites     | Wk24 | 0   |
| R388 | G3 DCIR MVA | DC-Targeting peptites     | Wk24 | 35  |
| R368 | G3 DCIR MVA | Non DC-Targeting peptites | Wk24 | 5   |
| R375 | G3 DCIR MVA | Non DC-Targeting peptites | Wk24 | 20  |
| R379 | G3 DCIR MVA | Non DC-Targeting peptites | Wk24 | 10  |
| R381 | G3 DCIR MVA | Non DC-Targeting peptites | Wk24 | 55  |
| R387 | G3 DCIR MVA | Non DC-Targeting peptites | Wk24 | 0   |
| R388 | G3 DCIR MVA | Non DC-Targeting peptites | Wk24 | 10  |
| R368 | G3 DCIR MVA | DC-Targeting peptites     | Wk26 | 20  |
| R375 | G3 DCIR MVA | DC-Targeting peptites     | Wk26 | 175 |
| R379 | G3 DCIR MVA | DC-Targeting peptites     | Wk26 | 570 |
| R381 | G3 DCIR MVA | DC-Targeting peptites     | Wk26 | 120 |
| R387 | G3 DCIR MVA | DC-Targeting peptites     | Wk26 | 0   |
| R388 | G3 DCIR MVA | DC-Targeting peptites     | Wk26 | 35  |
| R368 | G3 DCIR MVA | Non DC-Targeting peptites | Wk26 | 10  |
| R375 | G3 DCIR MVA | Non DC-Targeting peptites | Wk26 | 15  |
| R379 | G3 DCIR MVA | Non DC-Targeting peptites | Wk26 | 35  |
| R381 | G3 DCIR MVA | Non DC-Targeting peptites | Wk26 | 25  |
| R387 | G3 DCIR MVA | Non DC-Targeting peptites | Wk26 | 0   |
| R388 | G3 DCIR MVA | Non DC-Targeting peptites | Wk26 | 0   |
| R386 | G4 CD40 MVA | DC-Targeting peptites     | Wk0  | 10  |
| R389 | G4 CD40 MVA | DC-Targeting peptites     | Wk0  | 5   |
| R390 | G4 CD40 MVA | DC-Targeting peptites     | Wk0  | 20  |
| R391 | G4 CD40 MVA | DC-Targeting peptites     | Wk0  | 35  |
| R372 | G4 CD40 MVA | DC-Targeting peptites     | Wk0  | 5   |
| R383 | G4 CD40 MVA | DC-Targeting peptites     | Wk0  | 0   |
| R386 | G4 CD40 MVA | Non DC-Targeting peptites | Wk0  | 10  |
| R389 | G4 CD40 MVA | Non DC-Targeting peptites | Wk0  | 5   |
| R390 | G4 CD40 MVA | Non DC-Targeting peptites | Wk0  | 30  |
| R391 | G4 CD40 MVA | Non DC-Targeting peptites | Wk0  | 30  |
| R372 | G4 CD40 MVA | Non DC-Targeting peptites | Wk0  | 5   |

|      |             |                           |      |     |
|------|-------------|---------------------------|------|-----|
| R383 | G4 CD40 MVA | Non DC-Targeting peptites | Wk0  | 0   |
| R386 | G4 CD40 MVA | DC-Targeting peptites     | Wk2  | 95  |
| R389 | G4 CD40 MVA | DC-Targeting peptites     | Wk2  | 100 |
| R390 | G4 CD40 MVA | DC-Targeting peptites     | Wk2  | 40  |
| R391 | G4 CD40 MVA | DC-Targeting peptites     | Wk2  | 365 |
| R372 | G4 CD40 MVA | DC-Targeting peptites     | Wk2  | 20  |
| R383 | G4 CD40 MVA | DC-Targeting peptites     | Wk2  | 35  |
| R386 | G4 CD40 MVA | Non DC-Targeting peptites | Wk2  | 95  |
| R389 | G4 CD40 MVA | Non DC-Targeting peptites | Wk2  | 55  |
| R390 | G4 CD40 MVA | Non DC-Targeting peptites | Wk2  | 40  |
| R391 | G4 CD40 MVA | Non DC-Targeting peptites | Wk2  | 195 |
| R372 | G4 CD40 MVA | Non DC-Targeting peptites | Wk2  | 10  |
| R383 | G4 CD40 MVA | Non DC-Targeting peptites | Wk2  | 25  |
| R386 | G4 CD40 MVA | DC-Targeting peptites     | Wk6  | 80  |
| R389 | G4 CD40 MVA | DC-Targeting peptites     | Wk6  | 180 |
| R390 | G4 CD40 MVA | DC-Targeting peptites     | Wk6  | 40  |
| R391 | G4 CD40 MVA | DC-Targeting peptites     | Wk6  | 175 |
| R372 | G4 CD40 MVA | DC-Targeting peptites     | Wk6  | 125 |
| R383 | G4 CD40 MVA | DC-Targeting peptites     | Wk6  | 140 |
| R386 | G4 CD40 MVA | Non DC-Targeting peptites | Wk6  | 50  |
| R389 | G4 CD40 MVA | Non DC-Targeting peptites | Wk6  | 95  |
| R390 | G4 CD40 MVA | Non DC-Targeting peptites | Wk6  | 25  |
| R391 | G4 CD40 MVA | Non DC-Targeting peptites | Wk6  | 105 |
| R372 | G4 CD40 MVA | Non DC-Targeting peptites | Wk6  | 60  |
| R383 | G4 CD40 MVA | Non DC-Targeting peptites | Wk6  | 55  |
| R386 | G4 CD40 MVA | DC-Targeting peptites     | Wk14 | 155 |
| R389 | G4 CD40 MVA | DC-Targeting peptites     | Wk14 | 665 |
| R390 | G4 CD40 MVA | DC-Targeting peptites     | Wk14 | 85  |
| R391 | G4 CD40 MVA | DC-Targeting peptites     | Wk14 | 100 |
| R372 | G4 CD40 MVA | DC-Targeting peptites     | Wk14 | 150 |
| R383 | G4 CD40 MVA | DC-Targeting peptites     | Wk14 | 550 |
| R386 | G4 CD40 MVA | Non DC-Targeting peptites | Wk14 | 40  |
| R389 | G4 CD40 MVA | Non DC-Targeting peptites | Wk14 | 45  |
| R390 | G4 CD40 MVA | Non DC-Targeting peptites | Wk14 | 10  |
| R391 | G4 CD40 MVA | Non DC-Targeting peptites | Wk14 | 100 |
| R372 | G4 CD40 MVA | Non DC-Targeting peptites | Wk14 | 5   |
| R383 | G4 CD40 MVA | Non DC-Targeting peptites | Wk14 | 5   |
| R386 | G4 CD40 MVA | DC-Targeting peptites     | Wk22 | 130 |
| R389 | G4 CD40 MVA | DC-Targeting peptites     | Wk22 | 645 |
| R390 | G4 CD40 MVA | DC-Targeting peptites     | Wk22 | 10  |
| R391 | G4 CD40 MVA | DC-Targeting peptites     | Wk22 | 25  |
| R372 | G4 CD40 MVA | DC-Targeting peptites     | Wk22 | 190 |
| R383 | G4 CD40 MVA | DC-Targeting peptites     | Wk22 | 775 |



|      |             |                           |      |     |
|------|-------------|---------------------------|------|-----|
| R386 | G4 CD40 MVA | Non DC-Targeting peptites | Wk22 | 65  |
| R389 | G4 CD40 MVA | Non DC-Targeting peptites | Wk22 | 5   |
| R390 | G4 CD40 MVA | Non DC-Targeting peptites | Wk22 | 0   |
| R391 | G4 CD40 MVA | Non DC-Targeting peptites | Wk22 | 25  |
| R372 | G4 CD40 MVA | Non DC-Targeting peptites | Wk22 | 15  |
| R383 | G4 CD40 MVA | Non DC-Targeting peptites | Wk22 | 80  |
| R386 | G4 CD40 MVA | DC-Targeting peptites     | Wk24 | 210 |
| R389 | G4 CD40 MVA | DC-Targeting peptites     | Wk24 | 425 |
| R390 | G4 CD40 MVA | DC-Targeting peptites     | Wk24 | 75  |
| R391 | G4 CD40 MVA | DC-Targeting peptites     | Wk24 | 120 |
| R372 | G4 CD40 MVA | DC-Targeting peptites     | Wk24 | 280 |
| R383 | G4 CD40 MVA | DC-Targeting peptites     | Wk24 | 430 |
| R386 | G4 CD40 MVA | Non DC-Targeting peptites | Wk24 | 75  |
| R389 | G4 CD40 MVA | Non DC-Targeting peptites | Wk24 | 75  |
| R390 | G4 CD40 MVA | Non DC-Targeting peptites | Wk24 | 5   |
| R391 | G4 CD40 MVA | Non DC-Targeting peptites | Wk24 | 15  |
| R372 | G4 CD40 MVA | Non DC-Targeting peptites | Wk24 | 55  |
| R383 | G4 CD40 MVA | Non DC-Targeting peptites | Wk24 | 60  |
| R386 | G4 CD40 MVA | DC-Targeting peptites     | Wk26 | 95  |
| R389 | G4 CD40 MVA | DC-Targeting peptites     | Wk26 | 415 |
| R390 | G4 CD40 MVA | DC-Targeting peptites     | Wk26 | 85  |
| R391 | G4 CD40 MVA | DC-Targeting peptites     | Wk26 | 90  |
| R372 | G4 CD40 MVA | DC-Targeting peptites     | Wk26 | 180 |
| R383 | G4 CD40 MVA | DC-Targeting peptites     | Wk26 | 285 |
| R386 | G4 CD40 MVA | Non DC-Targeting peptites | Wk26 | 60  |
| R389 | G4 CD40 MVA | Non DC-Targeting peptites | Wk26 | 80  |
| R390 | G4 CD40 MVA | Non DC-Targeting peptites | Wk26 | 50  |
| R391 | G4 CD40 MVA | Non DC-Targeting peptites | Wk26 | 0   |
| R372 | G4 CD40 MVA | Non DC-Targeting peptites | Wk26 | 0   |
| R383 | G4 CD40 MVA | Non DC-Targeting peptites | Wk26 | 20  |
