# Supplementary material for: HIV-1 T cell epitopes targeted to Rhesus macaque CD40 and DCIR: A comparative study of prototype dendritic cell targeting therapeutic vaccine candidates
Source: PubMed Central journal article supplement (PMC6267996; doi:10.1371/journal.pone.0207794), 2018-11-30
Supplement: pone.0207794.s006.pdf [file pone.0207794.s006.pdf]

**S2 Table. IFN $\gamma$  ELISPOT data for individual Gag, Pol and Nef peptide stimulations corresponding to sequence carried by the DC-targeting vectors.** This table is the data that relates to [Fig 2](#) (G1 and G2) and [Fig 3](#) (G3 and G4) panels C and D. Peptide names, group, and sample time in weeks are identified. The values are the sum of spots for each peptide set.

| peptides | Group       | Sample time | % Response |
|----------|-------------|-------------|------------|
| gag253   | G1 MVA DCIR | Wk0         | 7.5        |
| gag253   | G2 MVA CD40 | Wk0         | 0          |
| gag253   | G3 DCIR MVA | Wk0         | 5          |
| gag253   | G4 CD40 MVA | Wk0         | 2.5        |
| gag253   | G1 MVA DCIR | Wk10        | 12.5       |
| gag253   | G2 MVA CD40 | Wk10        | 0          |
| gag253   | G1 MVA DCIR | Wk12        | 10         |
| gag253   | G2 MVA CD40 | Wk12        | 17.5       |
| gag253   | G1 MVA DCIR | Wk14        | 30         |
| gag253   | G2 MVA CD40 | Wk14        | 100        |
| gag253   | G3 DCIR MVA | Wk14        | 15         |
| gag253   | G4 CD40 MVA | Wk14        | 57.5       |
| gag253   | G1 MVA DCIR | Wk18        | 162.5      |
| gag253   | G2 MVA CD40 | Wk18        | 240        |
| gag253   | G1 MVA DCIR | Wk2         | 2.5        |
| gag253   | G2 MVA CD40 | Wk2         | 10         |
| gag253   | G3 DCIR MVA | Wk2         | 10         |
| gag253   | G4 CD40 MVA | Wk2         | 45         |
| gag253   | G3 DCIR MVA | Wk22        | 57.5       |
| gag253   | G4 CD40 MVA | Wk22        | 55         |
| gag253   | G1 MVA DCIR | Wk24        | 142.5      |
| gag253   | G2 MVA CD40 | Wk24        | 187.5      |
| gag253   | G3 DCIR MVA | Wk24        | 17.5       |
| gag253   | G4 CD40 MVA | Wk24        | 65         |
| gag253   | G3 DCIR MVA | Wk26        | 17.5       |
| gag253   | G4 CD40 MVA | Wk26        | 70         |
| gag253   | G1 MVA DCIR | Wk28        | 190        |
| gag253   | G2 MVA CD40 | Wk28        | 615        |
| gag253   | G3 DCIR MVA | Wk6         | 22.5       |
| gag253   | G4 CD40 MVA | Wk6         | 55         |
| gag17    | G1 MVA DCIR | Wk0         | 2.5        |
| gag17    | G2 MVA CD40 | Wk0         | 5          |

|        |             |      |      |
|--------|-------------|------|------|
| gag17  | G3 DCIR MVA | Wk0  | 0    |
| gag17  | G4 CD40 MVA | Wk0  | 0    |
| gag17  | G1 MVA DCIR | Wk10 | 0    |
| gag17  | G2 MVA CD40 | Wk10 | 0    |
| gag17  | G1 MVA DCIR | Wk12 | 0    |
| gag17  | G2 MVA CD40 | Wk12 | 5    |
| gag17  | G1 MVA DCIR | Wk14 | 0    |
| gag17  | G2 MVA CD40 | Wk14 | 0    |
| gag17  | G3 DCIR MVA | Wk14 | 0    |
| gag17  | G4 CD40 MVA | Wk14 | 10   |
| gag17  | G1 MVA DCIR | Wk18 | 2.5  |
| gag17  | G2 MVA CD40 | Wk18 | 10   |
| gag17  | G1 MVA DCIR | Wk2  | 0    |
| gag17  | G2 MVA CD40 | Wk2  | 2.5  |
| gag17  | G3 DCIR MVA | Wk2  | 7.5  |
| gag17  | G4 CD40 MVA | Wk2  | 12.5 |
| gag17  | G3 DCIR MVA | Wk22 | 5    |
| gag17  | G4 CD40 MVA | Wk22 | 2.5  |
| gag17  | G1 MVA DCIR | Wk24 | 7.5  |
| gag17  | G2 MVA CD40 | Wk24 | 12.5 |
| gag17  | G3 DCIR MVA | Wk24 | 2.5  |
| gag17  | G4 CD40 MVA | Wk24 | 7.5  |
| gag17  | G3 DCIR MVA | Wk26 | 7.5  |
| gag17  | G4 CD40 MVA | Wk26 | 2.5  |
| gag17  | G1 MVA DCIR | Wk28 | 2.5  |
| gag17  | G2 MVA CD40 | Wk28 | 2.5  |
| gag17  | G3 DCIR MVA | Wk6  | 82.5 |
| gag17  | G4 CD40 MVA | Wk6  | 42.5 |
| pol158 | G1 MVA DCIR | Wk0  | 5    |
| pol158 | G2 MVA CD40 | Wk0  | 10   |
| pol158 | G3 DCIR MVA | Wk0  | 7.5  |
| pol158 | G4 CD40 MVA | Wk0  | 7.5  |
| pol158 | G1 MVA DCIR | Wk10 | 20   |
| pol158 | G2 MVA CD40 | Wk10 | 25   |
| pol158 | G1 MVA DCIR | Wk12 | 35   |
| pol158 | G2 MVA CD40 | Wk12 | 37.5 |
| pol158 | G1 MVA DCIR | Wk14 | 25   |
| pol158 | G2 MVA CD40 | Wk14 | 220  |
| pol158 | G3 DCIR MVA | Wk14 | 175  |
| pol158 | G4 CD40 MVA | Wk14 | 115  |
| pol158 | G1 MVA DCIR | Wk18 | 60   |
| pol158 | G2 MVA CD40 | Wk18 | 540  |
| pol158 | G1 MVA DCIR | Wk2  | 7.5  |

|        |             |      |       |
|--------|-------------|------|-------|
| pol158 | G2 MVA CD40 | Wk2  | 22.5  |
| pol158 | G3 DCIR MVA | Wk2  | 25    |
| pol158 | G4 CD40 MVA | Wk2  | 32.5  |
| pol158 | G3 DCIR MVA | Wk22 | 172.5 |
| pol158 | G4 CD40 MVA | Wk22 | 210   |
| pol158 | G1 MVA DCIR | Wk24 | 75    |
| pol158 | G2 MVA CD40 | Wk24 | 405   |
| pol158 | G3 DCIR MVA | Wk24 | 132.5 |
| pol158 | G4 CD40 MVA | Wk24 | 165   |
| pol158 | G3 DCIR MVA | Wk26 | 210   |
| pol158 | G4 CD40 MVA | Wk26 | 205   |
| pol158 | G1 MVA DCIR | Wk28 | 127.5 |
| pol158 | G2 MVA CD40 | Wk28 | 695   |
| pol158 | G3 DCIR MVA | Wk6  | 60    |
| pol158 | G4 CD40 MVA | Wk6  | 42.5  |
| nef66  | G1 MVA DCIR | Wk0  | 0     |
| nef66  | G2 MVA CD40 | Wk0  | 0     |
| nef66  | G3 DCIR MVA | Wk0  | 0     |
| nef66  | G4 CD40 MVA | Wk0  | 0     |
| nef66  | G1 MVA DCIR | Wk10 | 2.5   |
| nef66  | G2 MVA CD40 | Wk10 | 0     |
| nef66  | G1 MVA DCIR | Wk12 | 0     |
| nef66  | G2 MVA CD40 | Wk12 | 5     |
| nef66  | G1 MVA DCIR | Wk14 | 0     |
| nef66  | G2 MVA CD40 | Wk14 | 0     |
| nef66  | G3 DCIR MVA | Wk14 | 5     |
| nef66  | G4 CD40 MVA | Wk14 | 0     |
| nef66  | G1 MVA DCIR | Wk18 | 5     |
| nef66  | G2 MVA CD40 | Wk18 | 17.5  |
| nef66  | G1 MVA DCIR | Wk2  | 0     |
| nef66  | G2 MVA CD40 | Wk2  | 0     |
| nef66  | G3 DCIR MVA | Wk2  | 5     |
| nef66  | G4 CD40 MVA | Wk2  | 7.5   |
| nef66  | G3 DCIR MVA | Wk22 | 7.5   |
| nef66  | G4 CD40 MVA | Wk22 | 2.5   |
| nef66  | G1 MVA DCIR | Wk24 | 0     |
| nef66  | G2 MVA CD40 | Wk24 | 22.5  |
| nef66  | G3 DCIR MVA | Wk24 | 2.5   |
| nef66  | G4 CD40 MVA | Wk24 | 5     |
| nef66  | G3 DCIR MVA | Wk26 | 12.5  |
| nef66  | G4 CD40 MVA | Wk26 | 0     |
| nef66  | G1 MVA DCIR | Wk28 | 7.5   |
| nef66  | G2 MVA CD40 | Wk28 | 32.5  |

|        |             |      |      |
|--------|-------------|------|------|
| nef66  | G3 DCIR MVA | Wk6  | 2.5  |
| nef66  | G4 CD40 MVA | Wk6  | 10   |
| nef116 | G1 MVA DCIR | Wk0  | 5    |
| nef116 | G2 MVA CD40 | Wk0  | 2.5  |
| nef116 | G3 DCIR MVA | Wk0  | 0    |
| nef116 | G4 CD40 MVA | Wk0  | 2.5  |
| nef116 | G1 MVA DCIR | Wk10 | 0    |
| nef116 | G2 MVA CD40 | Wk10 | 0    |
| nef116 | G1 MVA DCIR | Wk12 | 0    |
| nef116 | G2 MVA CD40 | Wk12 | 0    |
| nef116 | G1 MVA DCIR | Wk14 | 0    |
| nef116 | G2 MVA CD40 | Wk14 | 2.5  |
| nef116 | G3 DCIR MVA | Wk14 | 0    |
| nef116 | G4 CD40 MVA | Wk14 | 0    |
| nef116 | G1 MVA DCIR | Wk18 | 2.5  |
| nef116 | G2 MVA CD40 | Wk18 | 15   |
| nef116 | G1 MVA DCIR | Wk2  | 0    |
| nef116 | G2 MVA CD40 | Wk2  | 2.5  |
| nef116 | G3 DCIR MVA | Wk2  | 7.5  |
| nef116 | G4 CD40 MVA | Wk2  | 15   |
| nef116 | G3 DCIR MVA | Wk22 | 10   |
| nef116 | G4 CD40 MVA | Wk22 | 2.5  |
| nef116 | G1 MVA DCIR | Wk24 | 0    |
| nef116 | G2 MVA CD40 | Wk24 | 15   |
| nef116 | G3 DCIR MVA | Wk24 | 0    |
| nef116 | G4 CD40 MVA | Wk24 | 0    |
| nef116 | G3 DCIR MVA | Wk26 | 0    |
| nef116 | G4 CD40 MVA | Wk26 | 0    |
| nef116 | G1 MVA DCIR | Wk28 | 0    |
| nef116 | G2 MVA CD40 | Wk28 | 5    |
| nef116 | G3 DCIR MVA | Wk6  | 17.5 |
| nef116 | G4 CD40 MVA | Wk6  | 22.5 |
