# Supplementary material for: HIV-1 T cell epitopes targeted to Rhesus macaque CD40 and DCIR: A comparative study of prototype dendritic cell targeting therapeutic vaccine candidates
Source: PubMed Central journal article supplement (PMC6267996; doi:10.1371/journal.pone.0207794), 2018-11-30
Supplement: pone.0207794.s007.pdf [file pone.0207794.s007.pdf]

**S3 Table. Analysis of HIV-1 epitope-specific CD4<sup>+</sup> and CD8<sup>+</sup> T cell responses elicited in MVA-primed NHPs by  $\alpha$ DCIR.HIV5pep and  $\alpha$ CD40.HIV5pep vaccines and in naïve NHPs by  $\alpha$ DCIR.HIV5pep and  $\alpha$ CD40.HIV5pep vaccines.** This table is the data that relates to [S1 Fig](#). Animal name, group, T cell type and sample time in weeks are identified. The % response values for either HIV-1 antigen-specific CD4<sup>+</sup> or CD8<sup>+</sup> T cells are the sum of 1 cytokine, 2 cytokines, and three cytokines as determined by the ICS analysis.

| Animal | Group       | Sample time | T cell type | Cytokine No. | % Response |
|--------|-------------|-------------|-------------|--------------|------------|
| R368   | G3 DCIR MVA | Wk14        | CD4         | 3 cytokines  | 0.03074    |
| R368   | G3 DCIR MVA | Wk14        | CD4         | 2 cytokines  | 0.06682    |
| R368   | G3 DCIR MVA | Wk14        | CD4         | 1 cytokine   | 0.13843    |
| R368   | G3 DCIR MVA | Wk14        | CD8         | 3 cytokines  | 0.000      |
| R368   | G3 DCIR MVA | Wk14        | CD8         | 2 cytokines  | 0.05352    |
| R368   | G3 DCIR MVA | Wk14        | CD8         | 1 cytokine   | 0.20025    |
| R368   | G3 DCIR MVA | Wk24        | CD4         | 3 cytokines  | 0.05371    |
| R368   | G3 DCIR MVA | Wk24        | CD4         | 2 cytokines  | 0.09228    |
| R368   | G3 DCIR MVA | Wk24        | CD4         | 1 cytokine   | 0.14663    |
| R368   | G3 DCIR MVA | Wk24        | CD8         | 3 cytokines  | 0.01262    |
| R368   | G3 DCIR MVA | Wk24        | CD8         | 2 cytokines  | 0.09317    |
| R368   | G3 DCIR MVA | Wk24        | CD8         | 1 cytokine   | 0.45628    |
| R369   | G1 MVA DCIR | Wk10        | CD4         | 3 cytokines  | 0.0118     |
| R369   | G1 MVA DCIR | Wk10        | CD4         | 2 cytokines  | 0.01991    |
| R369   | G1 MVA DCIR | Wk10        | CD4         | 1 cytokine   | 0.03261    |
| R369   | G1 MVA DCIR | Wk10        | CD8         | 3 cytokines  | 0.02334    |
| R369   | G1 MVA DCIR | Wk10        | CD8         | 2 cytokines  | 0.13895    |
| R369   | G1 MVA DCIR | Wk10        | CD8         | 1 cytokine   | 0.22342    |
| R369   | G1 MVA DCIR | Wk26        | CD4         | 3 cytokines  | 0.45237    |
| R369   | G1 MVA DCIR | Wk26        | CD4         | 2 cytokines  | 0.59087    |
| R369   | G1 MVA DCIR | Wk26        | CD4         | 1 cytokine   | 0.65393    |
| R369   | G1 MVA DCIR | Wk26        | CD8         | 3 cytokines  | 0.05383    |
| R369   | G1 MVA DCIR | Wk26        | CD8         | 2 cytokines  | 0.17892    |
| R369   | G1 MVA DCIR | Wk26        | CD8         | 1 cytokine   | 0.26124    |
| R370   | G1 MVA DCIR | Wk10        | CD4         | 3 cytokines  | 0.00297    |
| R370   | G1 MVA DCIR | Wk10        | CD4         | 2 cytokines  | 0.00775    |
| R370   | G1 MVA DCIR | Wk10        | CD4         | 1 cytokine   | 0.01605    |
| R370   | G1 MVA DCIR | Wk10        | CD8         | 3 cytokines  | 0.00126    |
| R370   | G1 MVA DCIR | Wk10        | CD8         | 2 cytokines  | 0.00374    |

|      |             |      |     |             |         |
|------|-------------|------|-----|-------------|---------|
| R370 | G1 MVA DCIR | Wk10 | CD8 | 1 cytokine  | 0.06696 |
| R370 | G1 MVA DCIR | Wk26 | CD4 | 3 cytokines | 0.01572 |
| R370 | G1 MVA DCIR | Wk26 | CD4 | 2 cytokines | 0.03512 |
| R370 | G1 MVA DCIR | Wk26 | CD4 | 1 cytokine  | 0.05185 |
| R370 | G1 MVA DCIR | Wk26 | CD8 | 3 cytokines | 0.00169 |
| R370 | G1 MVA DCIR | Wk26 | CD8 | 2 cytokines | 0.03676 |
| R370 | G1 MVA DCIR | Wk26 | CD8 | 1 cytokine  | 0.2566  |
| R371 | G1 MVA DCIR | Wk10 | CD4 | 3 cytokines | 0.00772 |
| R371 | G1 MVA DCIR | Wk10 | CD4 | 2 cytokines | 0.02508 |
| R371 | G1 MVA DCIR | Wk10 | CD4 | 1 cytokine  | 0.03256 |
| R371 | G1 MVA DCIR | Wk10 | CD8 | 3 cytokines | 0.04259 |
| R371 | G1 MVA DCIR | Wk10 | CD8 | 2 cytokines | 0.15067 |
| R371 | G1 MVA DCIR | Wk10 | CD8 | 1 cytokine  | 0.22197 |
| R371 | G1 MVA DCIR | Wk26 | CD4 | 3 cytokines | 0.09251 |
| R371 | G1 MVA DCIR | Wk26 | CD4 | 2 cytokines | 0.19856 |
| R371 | G1 MVA DCIR | Wk26 | CD4 | 1 cytokine  | 0.23085 |
| R371 | G1 MVA DCIR | Wk26 | CD8 | 3 cytokines | 0.01922 |
| R371 | G1 MVA DCIR | Wk26 | CD8 | 2 cytokines | 0.07473 |
| R371 | G1 MVA DCIR | Wk26 | CD8 | 1 cytokine  | 0.13913 |
| R372 | G4 CD40 MVA | Wk14 | CD4 | 1 cytokine  | 0.03464 |
| R372 | G4 CD40 MVA | Wk14 | CD4 | 2 cytokines | 0.06996 |
| R372 | G4 CD40 MVA | Wk14 | CD4 | 3 cytokines | 0.10164 |
| R372 | G4 CD40 MVA | Wk14 | CD8 | 1 cytokine  | 0.00383 |
| R372 | G4 CD40 MVA | Wk14 | CD8 | 2 cytokines | 0.06095 |
| R372 | G4 CD40 MVA | Wk14 | CD8 | 3 cytokines | 0.13539 |
| R372 | G4 CD40 MVA | Wk24 | CD4 | 1 cytokine  | 0.16168 |
| R372 | G4 CD40 MVA | Wk24 | CD4 | 2 cytokines | 0.24919 |
| R372 | G4 CD40 MVA | Wk24 | CD4 | 3 cytokines | 0.28593 |
| R372 | G4 CD40 MVA | Wk24 | CD8 | 1 cytokine  | 0.02015 |
| R372 | G4 CD40 MVA | Wk24 | CD8 | 2 cytokines | 0.11009 |
| R372 | G4 CD40 MVA | Wk24 | CD8 | 3 cytokines | 0.14294 |
| R373 | G1 MVA DCIR | Wk10 | CD4 | 3 cytokines | 0.00168 |
| R373 | G1 MVA DCIR | Wk10 | CD4 | 2 cytokines | 0.01105 |
| R373 | G1 MVA DCIR | Wk10 | CD4 | 1 cytokine  | 0.02048 |
| R373 | G1 MVA DCIR | Wk10 | CD8 | 3 cytokines | 0.00535 |
| R373 | G1 MVA DCIR | Wk10 | CD8 | 2 cytokines | 0.02438 |
| R373 | G1 MVA DCIR | Wk10 | CD8 | 1 cytokine  | 0.11029 |
| R373 | G1 MVA DCIR | Wk26 | CD4 | 3 cytokines | 0.07056 |
| R373 | G1 MVA DCIR | Wk26 | CD4 | 2 cytokines | 0.1113  |
| R373 | G1 MVA DCIR | Wk26 | CD4 | 1 cytokine  | 0.13659 |
| R373 | G1 MVA DCIR | Wk26 | CD8 | 3 cytokines | 0.00516 |
| R373 | G1 MVA DCIR | Wk26 | CD8 | 2 cytokines | 0.01574 |
| R373 | G1 MVA DCIR | Wk26 | CD8 | 1 cytokine  | 0.05849 |
| R374 | G1 MVA DCIR | Wk10 | CD4 | 3 cytokines | 0.01825 |
| R374 | G1 MVA DCIR | Wk10 | CD4 | 2 cytokines | 0.02705 |
| R374 | G1 MVA DCIR | Wk10 | CD4 | 1 cytokine  | 0.03334 |

|      |             |      |     |             |         |
|------|-------------|------|-----|-------------|---------|
| R374 | G1 MVA DCIR | Wk10 | CD8 | 3 cytokines | 0.00984 |
| R374 | G1 MVA DCIR | Wk10 | CD8 | 2 cytokines | 0.05077 |
| R374 | G1 MVA DCIR | Wk10 | CD8 | 1 cytokine  | 0.12235 |
| R374 | G1 MVA DCIR | Wk26 | CD4 | 3 cytokines | 0.25642 |
| R374 | G1 MVA DCIR | Wk26 | CD4 | 2 cytokines | 0.3638  |
| R374 | G1 MVA DCIR | Wk26 | CD4 | 1 cytokine  | 0.39763 |
| R374 | G1 MVA DCIR | Wk26 | CD8 | 3 cytokines | 0.00877 |
| R374 | G1 MVA DCIR | Wk26 | CD8 | 2 cytokines | 0.01649 |
| R374 | G1 MVA DCIR | Wk26 | CD8 | 1 cytokine  | 0.08304 |
| R375 | G3 DCIR MVA | Wk14 | CD4 | 3 cytokines | 0.01233 |
| R375 | G3 DCIR MVA | Wk14 | CD4 | 2 cytokines | 0.05096 |
| R375 | G3 DCIR MVA | Wk14 | CD4 | 1 cytokine  | 0.11093 |
| R375 | G3 DCIR MVA | Wk14 | CD8 | 3 cytokines | 0.000   |
| R375 | G3 DCIR MVA | Wk14 | CD8 | 2 cytokines | 0.00946 |
| R375 | G3 DCIR MVA | Wk14 | CD8 | 1 cytokine  | 0.19172 |
| R375 | G3 DCIR MVA | Wk24 | CD4 | 3 cytokines | 0.06256 |
| R375 | G3 DCIR MVA | Wk24 | CD4 | 2 cytokines | 0.09147 |
| R375 | G3 DCIR MVA | Wk24 | CD4 | 1 cytokine  | 0.11269 |
| R375 | G3 DCIR MVA | Wk24 | CD8 | 3 cytokines | 0.00044 |
| R375 | G3 DCIR MVA | Wk24 | CD8 | 2 cytokines | 0.00296 |
| R375 | G3 DCIR MVA | Wk24 | CD8 | 1 cytokine  | 0.04115 |
| R376 | G2 MVA CD40 | Wk10 | CD4 | 1 cytokine  | 0.00419 |
| R376 | G2 MVA CD40 | Wk10 | CD4 | 2 cytokines | 0.01604 |
| R376 | G2 MVA CD40 | Wk10 | CD4 | 3 cytokines | 0.03366 |
| R376 | G2 MVA CD40 | Wk10 | CD8 | 1 cytokine  | 0.01723 |
| R376 | G2 MVA CD40 | Wk10 | CD8 | 2 cytokines | 0.15902 |
| R376 | G2 MVA CD40 | Wk10 | CD8 | 3 cytokines | 0.18492 |
| R376 | G2 MVA CD40 | Wk26 | CD4 | 1 cytokine  | 0.05331 |
| R376 | G2 MVA CD40 | Wk26 | CD4 | 2 cytokines | 0.09442 |
| R376 | G2 MVA CD40 | Wk26 | CD4 | 3 cytokines | 0.11503 |
| R376 | G2 MVA CD40 | Wk26 | CD8 | 1 cytokine  | 0.00449 |
| R376 | G2 MVA CD40 | Wk26 | CD8 | 2 cytokines | 0.04321 |
| R376 | G2 MVA CD40 | Wk26 | CD8 | 3 cytokines | 0.07239 |
| R377 | G2 MVA CD40 | Wk10 | CD4 | 1 cytokine  | 0.02731 |
| R377 | G2 MVA CD40 | Wk10 | CD4 | 2 cytokines | 0.03412 |
| R377 | G2 MVA CD40 | Wk10 | CD4 | 3 cytokines | 0.08706 |
| R377 | G2 MVA CD40 | Wk10 | CD8 | 1 cytokine  | 0.07005 |
| R377 | G2 MVA CD40 | Wk10 | CD8 | 2 cytokines | 0.16465 |
| R377 | G2 MVA CD40 | Wk10 | CD8 | 3 cytokines | 0.24485 |
| R377 | G2 MVA CD40 | Wk26 | CD4 | 1 cytokine  | 0.73122 |
| R377 | G2 MVA CD40 | Wk26 | CD4 | 2 cytokines | 1.0375  |
| R377 | G2 MVA CD40 | Wk26 | CD4 | 3 cytokines | 1.12712 |
| R377 | G2 MVA CD40 | Wk26 | CD8 | 1 cytokine  | 0.03289 |
| R377 | G2 MVA CD40 | Wk26 | CD8 | 2 cytokines | 0.06683 |
| R377 | G2 MVA CD40 | Wk26 | CD8 | 3 cytokines | 0.19642 |
| R378 | G2 MVA CD40 | Wk10 | CD4 | 1 cytokine  | 0.00734 |

|      |             |      |     |             |         |
|------|-------------|------|-----|-------------|---------|
| R378 | G2 MVA CD40 | Wk10 | CD4 | 2 cytokines | 0.01112 |
| R378 | G2 MVA CD40 | Wk10 | CD4 | 3 cytokines | 0.01993 |
| R378 | G2 MVA CD40 | Wk10 | CD8 | 1 cytokine  | 0.01253 |
| R378 | G2 MVA CD40 | Wk10 | CD8 | 2 cytokines | 0.03976 |
| R378 | G2 MVA CD40 | Wk10 | CD8 | 3 cytokines | 0.10622 |
| R378 | G2 MVA CD40 | Wk26 | CD4 | 1 cytokine  | 0.22588 |
| R378 | G2 MVA CD40 | Wk26 | CD4 | 2 cytokines | 0.33796 |
| R378 | G2 MVA CD40 | Wk26 | CD4 | 3 cytokines | 0.40142 |
| R378 | G2 MVA CD40 | Wk26 | CD8 | 1 cytokine  | 0.00309 |
| R378 | G2 MVA CD40 | Wk26 | CD8 | 2 cytokines | 0.00835 |
| R378 | G2 MVA CD40 | Wk26 | CD8 | 3 cytokines | 0.03884 |
| R379 | G3 DCIR MVA | Wk14 | CD4 | 3 cytokines | 0.0944  |
| R379 | G3 DCIR MVA | Wk14 | CD4 | 2 cytokines | 0.16628 |
| R379 | G3 DCIR MVA | Wk14 | CD4 | 1 cytokine  | 0.20692 |
| R379 | G3 DCIR MVA | Wk14 | CD8 | 3 cytokines | 0.0091  |
| R379 | G3 DCIR MVA | Wk14 | CD8 | 2 cytokines | 0.06072 |
| R379 | G3 DCIR MVA | Wk14 | CD8 | 1 cytokine  | 0.20188 |
| R379 | G3 DCIR MVA | Wk24 | CD4 | 3 cytokines | 0.20703 |
| R379 | G3 DCIR MVA | Wk24 | CD4 | 2 cytokines | 0.31013 |
| R379 | G3 DCIR MVA | Wk24 | CD4 | 1 cytokine  | 0.35971 |
| R379 | G3 DCIR MVA | Wk24 | CD8 | 3 cytokines | 0.02116 |
| R379 | G3 DCIR MVA | Wk24 | CD8 | 2 cytokines | 0.06479 |
| R379 | G3 DCIR MVA | Wk24 | CD8 | 1 cytokine  | 0.10311 |
| R380 | G2 MVA CD40 | Wk10 | CD4 | 1 cytokine  | 0.01559 |
| R380 | G2 MVA CD40 | Wk10 | CD4 | 2 cytokines | 0.04755 |
| R380 | G2 MVA CD40 | Wk10 | CD4 | 3 cytokines | 0.10124 |
| R380 | G2 MVA CD40 | Wk10 | CD8 | 1 cytokine  | 0.00575 |
| R380 | G2 MVA CD40 | Wk10 | CD8 | 2 cytokines | 0.01421 |
| R380 | G2 MVA CD40 | Wk10 | CD8 | 3 cytokines | 0.07953 |
| R380 | G2 MVA CD40 | Wk26 | CD4 | 1 cytokine  | 0.25071 |
| R380 | G2 MVA CD40 | Wk26 | CD4 | 2 cytokines | 0.38121 |
| R380 | G2 MVA CD40 | Wk26 | CD4 | 3 cytokines | 0.4306  |
| R380 | G2 MVA CD40 | Wk26 | CD8 | 1 cytokine  | 0.00467 |
| R380 | G2 MVA CD40 | Wk26 | CD8 | 2 cytokines | 0.02783 |
| R380 | G2 MVA CD40 | Wk26 | CD8 | 3 cytokines | 0.19237 |
| R381 | G3 DCIR MVA | Wk14 | CD4 | 3 cytokines | 0.0873  |
| R381 | G3 DCIR MVA | Wk14 | CD4 | 2 cytokines | 0.1443  |
| R381 | G3 DCIR MVA | Wk14 | CD4 | 1 cytokine  | 0.21125 |
| R381 | G3 DCIR MVA | Wk14 | CD8 | 3 cytokines | 0.000   |
| R381 | G3 DCIR MVA | Wk14 | CD8 | 2 cytokines | 0.00862 |
| R381 | G3 DCIR MVA | Wk14 | CD8 | 1 cytokine  | 0.09946 |
| R381 | G3 DCIR MVA | Wk24 | CD4 | 3 cytokines | 0.05399 |
| R381 | G3 DCIR MVA | Wk24 | CD4 | 2 cytokines | 0.09098 |
| R381 | G3 DCIR MVA | Wk24 | CD4 | 1 cytokine  | 0.13078 |
| R381 | G3 DCIR MVA | Wk24 | CD8 | 3 cytokines | 0.0025  |
| R381 | G3 DCIR MVA | Wk24 | CD8 | 2 cytokines | 0.05951 |

|      |             |      |     |             |         |
|------|-------------|------|-----|-------------|---------|
| R381 | G3 DCIR MVA | Wk24 | CD8 | 1 cytokine  | 0.12659 |
| R382 | G2 MVA CD40 | Wk10 | CD4 | 1 cytokine  | 0.02165 |
| R382 | G2 MVA CD40 | Wk10 | CD4 | 2 cytokines | 0.05283 |
| R382 | G2 MVA CD40 | Wk10 | CD4 | 3 cytokines | 0.08917 |
| R382 | G2 MVA CD40 | Wk10 | CD8 | 1 cytokine  | 0.03186 |
| R382 | G2 MVA CD40 | Wk10 | CD8 | 2 cytokines | 0.12541 |
| R382 | G2 MVA CD40 | Wk10 | CD8 | 3 cytokines | 0.16623 |
| R382 | G2 MVA CD40 | Wk26 | CD4 | 1 cytokine  | 0.40823 |
| R382 | G2 MVA CD40 | Wk26 | CD4 | 2 cytokines | 0.61383 |
| R382 | G2 MVA CD40 | Wk26 | CD4 | 3 cytokines | 0.66772 |
| R382 | G2 MVA CD40 | Wk26 | CD8 | 1 cytokine  | 0.01403 |
| R382 | G2 MVA CD40 | Wk26 | CD8 | 2 cytokines | 0.04856 |
| R382 | G2 MVA CD40 | Wk26 | CD8 | 3 cytokines | 0.04856 |
| R383 | G4 CD40 MVA | Wk14 | CD4 | 1 cytokine  | 0.095   |
| R383 | G4 CD40 MVA | Wk14 | CD4 | 2 cytokines | 0.16239 |
| R383 | G4 CD40 MVA | Wk14 | CD4 | 3 cytokines | 0.20061 |
| R383 | G4 CD40 MVA | Wk14 | CD8 | 1 cytokine  | 0.0068  |
| R383 | G4 CD40 MVA | Wk14 | CD8 | 2 cytokines | 0.01225 |
| R383 | G4 CD40 MVA | Wk14 | CD8 | 3 cytokines | 0.0773  |
| R383 | G4 CD40 MVA | Wk24 | CD4 | 1 cytokine  | 0.3473  |
| R383 | G4 CD40 MVA | Wk24 | CD4 | 2 cytokines | 0.52121 |
| R383 | G4 CD40 MVA | Wk24 | CD4 | 3 cytokines | 0.64513 |
| R383 | G4 CD40 MVA | Wk24 | CD8 | 1 cytokine  | 0.03229 |
| R383 | G4 CD40 MVA | Wk24 | CD8 | 2 cytokines | 0.10328 |
| R383 | G4 CD40 MVA | Wk24 | CD8 | 3 cytokines | 0.28769 |
| R384 | G2 MVA CD40 | Wk10 | CD4 | 1 cytokine  | 0.00044 |
| R384 | G2 MVA CD40 | Wk10 | CD4 | 2 cytokines | 0.01034 |
| R384 | G2 MVA CD40 | Wk10 | CD4 | 3 cytokines | 0.0165  |
| R384 | G2 MVA CD40 | Wk10 | CD8 | 1 cytokine  | 0.00446 |
| R384 | G2 MVA CD40 | Wk10 | CD8 | 2 cytokines | 0.03381 |
| R384 | G2 MVA CD40 | Wk10 | CD8 | 3 cytokines | 0.30161 |
| R384 | G2 MVA CD40 | Wk26 | CD4 | 1 cytokine  | 0.36171 |
| R384 | G2 MVA CD40 | Wk26 | CD4 | 2 cytokines | 0.64327 |
| R384 | G2 MVA CD40 | Wk26 | CD4 | 3 cytokines | 0.74921 |
| R384 | G2 MVA CD40 | Wk26 | CD8 | 1 cytokine  | 0.01858 |
| R384 | G2 MVA CD40 | Wk26 | CD8 | 2 cytokines | 0.13196 |
| R384 | G2 MVA CD40 | Wk26 | CD8 | 3 cytokines | 0.4231  |
| R385 | G1 MVA DCIR | Wk10 | CD4 | 3 cytokines | 0.01066 |
| R385 | G1 MVA DCIR | Wk10 | CD4 | 2 cytokines | 0.01518 |
| R385 | G1 MVA DCIR | Wk10 | CD4 | 1 cytokine  | 0.01686 |
| R385 | G1 MVA DCIR | Wk10 | CD8 | 3 cytokines | 0.00853 |
| R385 | G1 MVA DCIR | Wk10 | CD8 | 2 cytokines | 0.01939 |
| R385 | G1 MVA DCIR | Wk10 | CD8 | 1 cytokine  | 0.09135 |
| R385 | G1 MVA DCIR | Wk26 | CD4 | 3 cytokines | 0.13356 |
| R385 | G1 MVA DCIR | Wk26 | CD4 | 2 cytokines | 0.20902 |
| R385 | G1 MVA DCIR | Wk26 | CD4 | 1 cytokine  | 0.23624 |

|      |             |      |     |             |         |
|------|-------------|------|-----|-------------|---------|
| R385 | G1 MVA DCIR | Wk26 | CD8 | 3 cytokines | 0.00763 |
| R385 | G1 MVA DCIR | Wk26 | CD8 | 2 cytokines | 0.03759 |
| R385 | G1 MVA DCIR | Wk26 | CD8 | 1 cytokine  | 0.11601 |
| R386 | G4 CD40 MVA | Wk14 | CD4 | 1 cytokine  | 0.04131 |
| R386 | G4 CD40 MVA | Wk14 | CD4 | 2 cytokines | 0.09357 |
| R386 | G4 CD40 MVA | Wk14 | CD4 | 3 cytokines | 0.15287 |
| R386 | G4 CD40 MVA | Wk14 | CD8 | 1 cytokine  | 0.01726 |
| R386 | G4 CD40 MVA | Wk14 | CD8 | 2 cytokines | 0.08592 |
| R386 | G4 CD40 MVA | Wk14 | CD8 | 3 cytokines | 0.132   |
| R386 | G4 CD40 MVA | Wk24 | CD4 | 1 cytokine  | 0.04544 |
| R386 | G4 CD40 MVA | Wk24 | CD4 | 2 cytokines | 0.09527 |
| R386 | G4 CD40 MVA | Wk24 | CD4 | 3 cytokines | 0.1529  |
| R386 | G4 CD40 MVA | Wk24 | CD8 | 1 cytokine  | 0.01585 |
| R386 | G4 CD40 MVA | Wk24 | CD8 | 2 cytokines | 0.06504 |
| R386 | G4 CD40 MVA | Wk24 | CD8 | 3 cytokines | 0.13216 |
| R388 | G3 DCIR MVA | Wk24 | CD4 | 3 cytokines | 0.0317  |
| R388 | G3 DCIR MVA | Wk24 | CD4 | 2 cytokines | 0.09314 |
| R388 | G3 DCIR MVA | Wk24 | CD4 | 1 cytokine  | 0.12653 |
| R388 | G3 DCIR MVA | Wk24 | CD8 | 3 cytokines | 0.0023  |
| R388 | G3 DCIR MVA | Wk24 | CD8 | 2 cytokines | 0.02222 |
| R388 | G3 DCIR MVA | Wk24 | CD8 | 1 cytokine  | 0.15366 |
| R389 | G4 CD40 MVA | Wk24 | CD4 | 1 cytokine  | 0.20965 |
| R389 | G4 CD40 MVA | Wk24 | CD4 | 2 cytokines | 0.28967 |
| R389 | G4 CD40 MVA | Wk24 | CD4 | 3 cytokines | 0.33882 |
| R389 | G4 CD40 MVA | Wk24 | CD8 | 1 cytokine  | 0.01633 |
| R389 | G4 CD40 MVA | Wk24 | CD8 | 2 cytokines | 0.05975 |
| R389 | G4 CD40 MVA | Wk24 | CD8 | 3 cytokines | 0.11429 |
| R390 | G4 CD40 MVA | Wk14 | CD4 | 1 cytokine  | 0.00876 |
| R390 | G4 CD40 MVA | Wk14 | CD4 | 2 cytokines | 0.0166  |
| R390 | G4 CD40 MVA | Wk14 | CD4 | 3 cytokines | 0.02288 |
| R390 | G4 CD40 MVA | Wk14 | CD8 | 1 cytokine  | 0.000   |
| R390 | G4 CD40 MVA | Wk14 | CD8 | 2 cytokines | 0.01722 |
| R390 | G4 CD40 MVA | Wk14 | CD8 | 3 cytokines | 0.06344 |
| R390 | G4 CD40 MVA | Wk24 | CD4 | 1 cytokine  | 0.04056 |
| R390 | G4 CD40 MVA | Wk24 | CD4 | 2 cytokines | 0.06347 |
| R390 | G4 CD40 MVA | Wk24 | CD4 | 3 cytokines | 0.07834 |
| R390 | G4 CD40 MVA | Wk24 | CD8 | 1 cytokine  | 0.00757 |
| R390 | G4 CD40 MVA | Wk24 | CD8 | 2 cytokines | 0.04337 |
| R390 | G4 CD40 MVA | Wk24 | CD8 | 3 cytokines | 0.13132 |
| R391 | G4 CD40 MVA | Wk14 | CD4 | 1 cytokine  | 0.01963 |
| R391 | G4 CD40 MVA | Wk14 | CD4 | 2 cytokines | 0.05489 |
| R391 | G4 CD40 MVA | Wk14 | CD4 | 3 cytokines | 0.07945 |
| R391 | G4 CD40 MVA | Wk14 | CD8 | 1 cytokine  | 0.00478 |
| R391 | G4 CD40 MVA | Wk14 | CD8 | 2 cytokines | 0.0229  |
| R391 | G4 CD40 MVA | Wk14 | CD8 | 3 cytokines | 0.07322 |
| R391 | G4 CD40 MVA | Wk24 | CD4 | 1 cytokine  | 0.0377  |

|      |             |      |     |             |         |
|------|-------------|------|-----|-------------|---------|
| R391 | G4 CD40 MVA | Wk24 | CD4 | 2 cytokines | 0.06141 |
| R391 | G4 CD40 MVA | Wk24 | CD4 | 3 cytokines | 0.08772 |
| R391 | G4 CD40 MVA | Wk24 | CD8 | 1 cytokine  | 0.00971 |
| R391 | G4 CD40 MVA | Wk24 | CD8 | 2 cytokines | 0.02435 |
| R391 | G4 CD40 MVA | Wk24 | CD8 | 3 cytokines | 0.05628 |
