# Supplementary material for: HIV-1 T cell epitopes targeted to Rhesus macaque CD40 and DCIR: A comparative study of prototype dendritic cell targeting therapeutic vaccine candidates
Source: PubMed Central journal article supplement (PMC6267996; doi:10.1371/journal.pone.0207794), 2018-11-30
Supplement: pone.0207794.s009.pdf [file pone.0207794.s009.pdf]

**S5 Table. Serum HIV5pep-specific IgG responses elicited by  $\alpha$ DCIR.HIV5pep or  $\alpha$ CD40.HIV5pep vaccines.** This table is the data that relates to [Fig 6](#). Animal numbers, group, and sample time in weeks are identified. D 0 is sample just prior to study initiation. The  $1/EC_{50}$  values were calculated as indicated in the Methods section.

|                                  |         | <b>NHP 1</b> | <b>NHP 2</b> | <b>NHP 3</b> | <b>NHP 4</b> | <b>NHP 5</b> | <b>NHP 6</b> |
|----------------------------------|---------|--------------|--------------|--------------|--------------|--------------|--------------|
| <b>D 0 (MVA #1)</b>              | Group 1 | 6.7          |              | 7.0          | 19.1         | 11.9         | 8.5          |
| <b>wk 2</b>                      | Group 1 | 17.5         | 39.3         | 3.5          | 11.3         | 24.0         | 5.8          |
| <b>wk 8 (MVA #2)</b>             | Group 1 | 4.7          | 15.1         | 4.5          | 3.9          | 14.7         | 14.2         |
| <b>wk 10</b>                     | Group 1 | 15.3         | 20.1         | 4.4          | 3.9          | 7.3          | 5.6          |
| <b>wk 12 (Vaccine #1) sera</b>   | Group 1 | 29.2         | 13.1         | 2.6          | 9.3          | 7.0          | 7.2          |
| <b>wk 12 (Vaccine #1) plasma</b> | Group 1 | 9.6          | 18.2         | 6.0          | 9.0          | 9.7          | 3.1          |
| <b>wk 14</b>                     | Group 1 | 192.5        | 206.7        | 331.1        | 56.9         | 262.1        | 187.7        |
| <b>wk 16 (Vaccine #2)</b>        | Group 1 | 120.9        | 139.5        | 230.8        | 38.6         | 119.0        | 111.0        |
| <b>wk 18</b>                     | Group 1 | 2030.5       | 1802.8       | 5592.8       | 1100.8       | 4315.9       | 2272.7       |
| <b>wk 24 (Vaccine # 3)</b>       | Group 1 | 184.2        | 112.8        | 297.7        | 60.6         | 332.3        | 254.3        |
| <b>wk 26</b>                     | Group 1 | 739.6        | 883.4        | 5083.9       | 925.9        | 1995.2       | 2582.6       |
| <b>wk 28</b>                     | Group 1 | 592.4        | 547.0        | 2862.9       | 463.0        | 1384.1       | 1149.6       |

|                                  |         |        |        |         |        |        |        |
|----------------------------------|---------|--------|--------|---------|--------|--------|--------|
| <b>D 0 (MVA #1)</b>              | Group 1 | 16.5   | 25.1   | 9.7     | 16.2   | 11.6   | 3.4    |
| <b>wk 2</b>                      | Group 1 | 16.1   | 13.7   | 14.3    | 5.5    | 6.8    | 3.1    |
| <b>wk 8 (MVA #2)</b>             | Group 1 | 20.6   | 16.1   | 6.0     | 7.4    | 0.3    | 1.1    |
| <b>wk 10</b>                     | Group 1 | 7.3    | 8.1    | 10.2    | 8.2    | 10.2   | 1.2    |
| <b>wk 12 (Vaccine #1) sera</b>   | Group 1 | 16.5   | 2.6    | 12.9    | 1.1    | 0.5    | 4.5    |
| <b>wk 12 (Vaccine #1) plasma</b> | Group 1 | 14.5   | 13.6   | 12.2    | 10.1   | 1.0    | 0.3    |
| <b>wk 14</b>                     | Group 1 | 284.6  | 168.1  | 299.1   | 332.2  | 120.9  | 23.7   |
| <b>wk 16 (Vaccine #2)</b>        | Group 1 | 127.2  | 119.8  | 170.7   | 146.7  | 61.1   | 32.3   |
| <b>wk 18</b>                     | Group 1 | 3586.8 | 7917.7 | 3855.1  | 2898.6 | 858.4  | 2478.3 |
| <b>wk 24 (Vaccine # 3)</b>       | Group 1 | 1092.5 | 1621.5 | 1123.3  | 620.0  | 115.5  | 232.1  |
| <b>wk 26</b>                     | Group 1 | 2560.8 | 4393.7 | 5277.0  | 3150.6 | 1487.7 | 2351.3 |
| <b>wk 28</b>                     | Group 1 | 2138.1 | 3079.8 | 2791.0  | 1545.8 | 558.7  | 657.5  |
|                                  |         |        |        |         |        |        |        |
| <b>D 0 (Vaccine #1)</b>          | Group 3 | 1.8    | 3.9    | 9.1     | 0.0    | 5.1    | 39.8   |
| <b>wk 2</b>                      | Group 3 | 318.3  | 265.4  | 506.3   | 280.9  | 390.0  | 234.9  |
| <b>wk 4 (Vaccine #2)</b>         | Group 3 | 324.8  | 227.8  | 354.1   | 258.5  | 94.0   | 334.7  |
| <b>wk 6</b>                      | Group 3 | 2191.5 | 8944.5 | 9689.9  | 3139.7 | 2457.0 | 3096.9 |
| <b>wk 12 (Vaccine #3)</b>        | Group 3 | 257.9  | 502.5  | 661.8   | 398.2  |        | 483.3  |
| <b>wk 14</b>                     | Group 3 | 936.3  | 2739.7 | 2828.1  | 1320.8 |        | 1649.3 |
| <b>wk 22 (MVA)</b>               | Group 3 | 164.2  | 262.2  | 305.6   | 191.8  |        | 147.1  |
| <b>wk 24</b>                     | Group 3 | 71.7   | 250.3  | 404.2   | 192.6  |        | 372.3  |
| <b>wk 28</b>                     | Group 3 | 168.5  | 210.7  | 370.1   | 148.2  |        | 390.2  |
|                                  |         |        |        |         |        |        |        |
| <b>D 0 (Vaccine #1)</b>          | Group 4 | 19.6   | 18.0   | 172.5   | 2.8    | 28.0   | 9.8    |
| <b>wk 2</b>                      | Group 4 | 108.5  | 276.9  | 1008.1  | 350.8  | 138.0  | 75.5   |
| <b>wk 4 (Vaccine #2)</b>         | Group 4 | 112.9  | 137.9  | 823.7   | 239.0  | 108.0  | 79.9   |
| <b>wk 6</b>                      | Group 4 | 2708.6 | 5934.7 | 14556.0 | 9009.0 | 2527.8 | 1541.8 |
| <b>wk 12 (Vaccine #3)</b>        | Group 4 | 122.2  | 163.0  | 674.8   | 1027.1 | 139.4  | 165.0  |
| <b>wk 14</b>                     | Group 4 | 628.1  | 1599.7 | 1574.1  | 1950.5 | 524.7  | 505.1  |
| <b>wk 22 (MVA)</b>               | Group 4 | 167.9  | 520.6  | 1376.7  | 1509.0 | 212.5  | 200.5  |
| <b>wk 24</b>                     | Group 4 | 268.6  | 454.1  | 1793.7  | 1410.4 | 241.0  | 296.7  |
| <b>wk 28</b>                     | Group 4 | 368.7  | 383.4  | 1081.0  | 1001.6 | 228.7  | 284.9  |
