# Supplementary material for: HIV-1 T cell epitopes targeted to Rhesus macaque CD40 and DCIR: A comparative study of prototype dendritic cell targeting therapeutic vaccine candidates
Source: PubMed Central journal article supplement (PMC6267996; doi:10.1371/journal.pone.0207794), 2018-11-30
Supplement: pone.0207794.s010.pdf [file pone.0207794.s010.pdf]

**S6 Table. Sample titration curves used for the calculation of the serum antibody response presented in Fig 6.** These are the primary readings for titration of the sera corresponding to the indicated samples for each of the six animals in each group. The dilution series from top to bottom were, respectively, 1/75, 1/225, 1/675, 1/2024, 1/6060, 1/18214, 1/54644, and 1/163944. These data are plotted as average values in [S3 Fig](#).

| NHP 1  | NHP 2  | NHP 3  | NHP 4  | NHP 5  | NHP6   | Sample                   |
|--------|--------|--------|--------|--------|--------|--------------------------|
| 0.1411 | 0.113  | 0.0974 | 0.1603 | 0.2202 | 0.0991 | G1 D0                    |
| 0.0762 | 0.0732 | 0.0583 | 0.0616 | 0.0918 | 0.0574 | G1 D0                    |
| 0.0541 | 0.0545 | 0.0536 | 0.0539 | 0.0675 | 0.0535 | G1 D0                    |
| 0.0483 | 0.0494 | 0.0475 | 0.0491 | 0.0515 | 0.0477 | G1 D0                    |
| 0.0471 | 0.0477 | 0.0477 | 0.0488 | 0.0491 | 0.0487 | G1 D0                    |
| 0.0465 | 0.0458 | 0.0604 | 0.0476 | 0.0487 | 0.0472 | G1 D0                    |
| 0.0484 | 0.0801 | 0.0462 | 0.0477 | 0.0511 | 0.0509 | G1 D0                    |
| 0.047  | 0.0577 | 0.0513 | 0.0454 | 0.0483 | 0.0485 | G1 D0                    |
|        |        |        |        |        |        |                          |
| 0.2543 | 0.6759 | 0.0871 | 0.148  | 0.3075 | 0.0909 | G1 wk 2 post MVA prime 1 |
| 0.0914 | 0.2655 | 0.0609 | 0.0688 | 0.0947 | 0.0587 | G1 wk 2 post MVA prime 1 |
| 0.0628 | 0.1306 | 0.051  | 0.0535 | 0.0647 | 0.0508 | G1 wk 2 post MVA prime 1 |
| 0.0592 | 0.0726 | 0.0451 | 0.0474 | 0.0506 | 0.0472 | G1 wk 2 post MVA prime 1 |
| 0.0503 | 0.0576 | 0.0489 | 0.0502 | 0.0496 | 0.049  | G1 wk 2 post MVA prime 1 |
| 0.0492 | 0.0525 | 0.0479 | 0.0497 | 0.0495 | 0.0489 | G1 wk 2 post MVA prime 1 |
| 0.0506 | 0.0488 | 0.0464 | 0.0477 | 0.0504 | 0.0459 | G1 wk 2 post MVA prime 1 |
| 0.0472 | 0.0458 | 0.0462 | 0.048  | 0.046  | 0.0453 | G1 wk 2 post MVA prime 1 |
|        |        |        |        |        |        |                          |

|        |        |        |        |        |        |                                  |
|--------|--------|--------|--------|--------|--------|----------------------------------|
| 0.1439 | 0.2658 | 0.1018 | 0.1157 | 0.2574 | 0.1393 | G1 wk 8 (MVA prime 2 inj)        |
| 0.0795 | 0.1049 | 0.0628 | 0.0698 | 0.1016 | 0.0633 | G1 wk 8 (MVA prime 2 inj)        |
| 0.0601 | 0.0658 | 0.0540 | 0.0556 | 0.0671 | 0.0494 | G1 wk 8 (MVA prime 2 inj)        |
| 0.0519 | 0.0559 | 0.0495 | 0.0500 | 0.0530 | 0.0484 | G1 wk 8 (MVA prime 2 inj)        |
| 0.0503 | 0.0499 | 0.0497 | 0.0510 | 0.0503 | 0.0490 | G1 wk 8 (MVA prime 2 inj)        |
| 0.0484 | 0.0496 | 0.0498 | 0.0486 | 0.0512 | 0.0449 | G1 wk 8 (MVA prime 2 inj)        |
| 0.0492 | 0.0494 | 0.0494 | 0.0502 | 0.0486 | 0.0463 | G1 wk 8 (MVA prime 2 inj)        |
| 0.0510 | 0.0492 | 0.0485 | 0.0502 | 0.0482 | 0.0487 | G1 wk 8 (MVA prime 2 inj)        |
|        |        |        |        |        |        |                                  |
| 0.2688 | 0.2816 | 0.0989 | 0.1229 | 0.2204 | 0.0956 | G1 wk 10 (2 wk post MVA prime 2) |
| 0.1069 | 0.0959 | 0.0625 | 0.0725 | 0.0900 | 0.0597 | G1 wk 10 (2 wk post MVA prime 2) |
| 0.0646 | 0.0649 | 0.0532 | 0.0572 | 0.0983 | 0.0523 | G1 wk 10 (2 wk post MVA prime 2) |
| 0.0532 | 0.0506 | 0.0479 | 0.0515 | 0.0529 | 0.0486 | G1 wk 10 (2 wk post MVA prime 2) |
| 0.0527 | 0.0534 | 0.0490 | 0.0482 | 0.0526 | 0.0505 | G1 wk 10 (2 wk post MVA prime 2) |
| 0.0469 | 0.0510 | 0.0485 | 0.0490 | 0.0481 | 0.0482 | G1 wk 10 (2 wk post MVA prime 2) |
| 0.0496 | 0.0494 | 0.0492 | 0.0480 | 0.0468 | 0.0480 | G1 wk 10 (2 wk post MVA prime 2) |
| 0.0486 | 0.0484 | 0.0459 | 0.0462 | 0.0467 | 0.0489 | G1 wk 10 (2 wk post MVA prime 2) |
|        |        |        |        |        |        |                                  |
| 0.3256 | 0.2175 | 0.0856 | 0.1346 | 0.1470 | 0.1009 | G1 wk 12 vaccine inj plasma      |
| 0.0865 | 0.0900 | 0.0599 | 0.0667 | 0.0720 | 0.0595 | G1 wk 12 vaccine inj plasma      |
| 0.0627 | 0.0612 | 0.0545 | 0.0554 | 0.0630 | 0.0525 | G1 wk 12 vaccine inj plasma      |
| 0.0517 | 0.0506 | 0.0479 | 0.0492 | 0.0530 | 0.0483 | G1 wk 12 vaccine inj plasma      |
| 0.0502 | 0.0480 | 0.0476 | 0.0479 | 0.0503 | 0.0507 | G1 wk 12 vaccine inj plasma      |
| 0.0483 | 0.0479 | 0.0466 | 0.0491 | 0.0491 | 0.0466 | G1 wk 12 vaccine inj plasma      |
| 0.0497 | 0.0473 | 0.0471 | 0.0479 | 0.0492 | 0.0499 | G1 wk 12 vaccine inj plasma      |
| 0.0486 | 0.0469 | 0.0469 | 0.0489 | 0.0459 | 0.0462 | G1 wk 12 vaccine inj plasma      |
|        |        |        |        |        |        |                                  |

|        |        |        |        |        |        |                                   |
|--------|--------|--------|--------|--------|--------|-----------------------------------|
| 0.2090 | 0.2759 | 0.0904 | 0.1372 | 0.1890 | 0.0903 | G1 wk 12 vaccine inj sera         |
| 0.0945 | 0.0996 | 0.0577 | 0.0689 | 0.0842 | 0.0598 | G1 wk 12 vaccine inj sera         |
| 0.0659 | 0.0649 | 0.0513 | 0.0535 | 0.0651 | 0.0557 | G1 wk 12 vaccine inj sera         |
| 0.0540 | 0.0518 | 0.0512 | 0.0492 | 0.0508 | 0.0485 | G1 wk 12 vaccine inj sera         |
| 0.0513 | 0.0473 | 0.0488 | 0.0484 | 0.0488 | 0.0497 | G1 wk 12 vaccine inj sera         |
| 0.0476 | 0.0487 | 0.0468 | 0.0471 | 0.0500 | 0.0478 | G1 wk 12 vaccine inj sera         |
| 0.0508 | 0.0491 | 0.0479 | 0.0481 | 0.0555 | 0.0476 | G1 wk 12 vaccine inj sera         |
| 0.0486 | 0.0466 | 0.0449 | 0.0431 | 0.0442 | 0.0482 | G1 wk 12 vaccine inj sera         |
|        |        |        |        |        |        |                                   |
| 1.5275 | 1.4430 | 1.5973 | 0.8791 | 1.5111 | 1.3735 | G1 wk14 (2wk post vaccine boost)  |
| 0.9334 | 1.0219 | 1.2145 | 0.4185 | 1.1424 | 0.9766 | G1 wk14 (2wk post vaccine boost)  |
| 0.4010 | 0.5170 | 0.7262 | 0.1720 | 0.6078 | 0.5308 | G1 wk14 (2wk post vaccine boost)  |
| 0.1544 | 0.1948 | 0.3264 | 0.0870 | 0.2553 | 0.2464 | G1 wk14 (2wk post vaccine boost)  |
| 0.0844 | 0.0906 | 0.1355 | 0.0585 | 0.1097 | 0.1080 | G1 wk14 (2wk post vaccine boost)  |
| 0.0579 | 0.0598 | 0.0733 | 0.0530 | 0.0636 | 0.0651 | G1 wk14 (2wk post vaccine boost)  |
| 0.0525 | 0.0547 | 0.0561 | 0.0516 | 0.0528 | 0.0554 | G1 wk14 (2wk post vaccine boost)  |
| 0.0532 | 0.0492 | 0.0552 | 0.0497 | 0.0491 | 0.0521 | G1 wk14 (2wk post vaccine boost)  |
|        |        |        |        |        |        |                                   |
| 1.2559 | 1.3611 | 1.5030 | 0.6572 | 1.2660 | 1.2298 | G1 wk 16 (4wk post vaccine boost) |
| 0.7392 | 0.7624 | 1.0448 | 0.2594 | 0.6995 | 0.6652 | G1 wk 16 (4wk post vaccine boost) |
| 0.2906 | 0.3191 | 0.5703 | 0.1153 | 0.2966 | 0.2964 | G1 wk 16 (4wk post vaccine boost) |
| 0.1344 | 0.1362 | 0.2339 | 0.0666 | 0.1240 | 0.1282 | G1 wk 16 (4wk post vaccine boost) |
| 0.0753 | 0.0752 | 0.0972 | 0.0540 | 0.0674 | 0.0673 | G1 wk 16 (4wk post vaccine boost) |
| 0.0581 | 0.0571 | 0.0639 | 0.0504 | 0.0531 | 0.0528 | G1 wk 16 (4wk post vaccine boost) |
| 0.0529 | 0.0525 | 0.0558 | 0.0484 | 0.0512 | 0.0503 | G1 wk 16 (4wk post vaccine boost) |
| 0.0494 | 0.0492 | 0.0489 | 0.0442 | 0.0467 | 0.0475 | G1 wk 16 (4wk post vaccine boost) |
|        |        |        |        |        |        |                                   |

|        |        |        |        |        |        |                           |
|--------|--------|--------|--------|--------|--------|---------------------------|
| 0.2314 | 0.3941 | 0.1802 | 0.2899 | 0.1949 | 0.0828 | G2 D0                     |
| 0.0870 | 0.1349 | 0.0851 | 0.1141 | 0.0823 | 0.0575 | G2 D0                     |
| 0.0588 | 0.0701 | 0.0562 | 0.0675 | 0.0630 | 0.0533 | G2 D0                     |
| 0.0504 | 0.0536 | 0.0494 | 0.0542 | 0.0522 | 0.0490 | G2 D0                     |
| 0.0494 | 0.0503 | 0.0483 | 0.0492 | 0.0514 | 0.0489 | G2 D0                     |
| 0.0477 | 0.0481 | 0.0472 | 0.0490 | 0.0500 | 0.0478 | G2 D0                     |
| 0.0487 | 0.0480 | 0.0481 | 0.0560 | 0.0477 | 0.0480 | G2 D0                     |
| 0.0489 | 0.0470 | 0.0462 | 0.0485 | 0.0468 | 0.0464 | G2 D0                     |
|        |        |        |        |        |        |                           |
| 0.2445 | 0.4028 | 0.2206 | 0.1587 | 0.1256 | 0.1009 | G2 wk 2 post MVA prime 1  |
| 0.0933 | 0.2525 | 0.0887 | 0.0889 | 0.0690 | 0.0627 | G2 wk 2 post MVA prime 1  |
| 0.0606 | 0.0785 | 0.0582 | 0.0559 | 0.0529 | 0.0591 | G2 wk 2 post MVA prime 1  |
| 0.0522 | 0.0562 | 0.0523 | 0.0505 | 0.0487 | 0.0496 | G2 wk 2 post MVA prime 1  |
| 0.0502 | 0.0558 | 0.0507 | 0.0491 | 0.0489 | 0.0490 | G2 wk 2 post MVA prime 1  |
| 0.0492 | 0.0489 | 0.0476 | 0.0491 | 0.0475 | 0.0484 | G2 wk 2 post MVA prime 1  |
| 0.0485 | 0.0476 | 0.0485 | 0.0474 | 0.0465 | 0.0480 | G2 wk 2 post MVA prime 1  |
| 0.0483 | 0.0475 | 0.0457 | 0.0467 | 0.0473 | 0.0476 | G2 wk 2 post MVA prime 1  |
|        |        |        |        |        |        |                           |
| 0.3636 | 0.2265 | 0.1369 | 0.1933 | 0.0984 | 0.0752 | G2 wk 8 (MVA prime 2 inj) |
| 0.1374 | 0.0859 | 0.0742 | 0.0973 | 0.0880 | 0.0561 | G2 wk 8 (MVA prime 2 inj) |
| 0.0728 | 0.0589 | 0.0557 | 0.0616 | 0.0586 | 0.0554 | G2 wk 8 (MVA prime 2 inj) |
| 0.0539 | 0.0523 | 0.0522 | 0.0543 | 0.0510 | 0.0507 | G2 wk 8 (MVA prime 2 inj) |
| 0.0512 | 0.0497 | 0.0500 | 0.0502 | 0.0472 | 0.0506 | G2 wk 8 (MVA prime 2 inj) |
| 0.0489 | 0.0491 | 0.0441 | 0.0492 | 0.0460 | 0.0526 | G2 wk 8 (MVA prime 2 inj) |
| 0.0493 | 0.0480 | 0.0505 | 0.0484 | 0.0488 | 0.0507 | G2 wk 8 (MVA prime 2 inj) |
| 0.0493 | 0.0487 | 0.0473 | 0.0514 | 0.0502 | 0.0496 | G2 wk 8 (MVA prime 2 inj) |
|        |        |        |        |        |        |                           |

|        |        |        |        |        |        |                                  |
|--------|--------|--------|--------|--------|--------|----------------------------------|
| 0.2652 | 0.2196 | 0.1687 | 0.2008 | 0.1150 | 0.0858 | G2 wk 10 (2 wk post MVA prime 2) |
| 0.1431 | 0.1088 | 0.0766 | 0.0974 | 0.0607 | 0.0570 | G2 wk 10 (2 wk post MVA prime 2) |
| 0.0809 | 0.0671 | 0.0584 | 0.0640 | 0.0516 | 0.0623 | G2 wk 10 (2 wk post MVA prime 2) |
| 0.0566 | 0.0521 | 0.0505 | 0.0531 | 0.0480 | 0.0513 | G2 wk 10 (2 wk post MVA prime 2) |
| 0.0534 | 0.0516 | 0.0507 | 0.0480 | 0.0483 | 0.0490 | G2 wk 10 (2 wk post MVA prime 2) |
| 0.0490 | 0.0496 | 0.0515 | 0.0508 | 0.0490 | 0.0497 | G2 wk 10 (2 wk post MVA prime 2) |
| 0.0499 | 0.0486 | 0.0498 | 0.0482 | 0.0499 | 0.0484 | G2 wk 10 (2 wk post MVA prime 2) |
| 0.0489 | 0.0517 | 0.0487 | 0.0481 | 0.0469 | 0.0484 | G2 wk 10 (2 wk post MVA prime 2) |
|        |        |        |        |        |        |                                  |
| 0.3153 | 0.1638 | 0.1254 | 0.1271 | 0.1022 | 0.0959 | G2 wk 12 vaccine inj plasma      |
| 0.1259 | 0.0969 | 0.0577 | 0.0895 | 0.0767 | 0.0601 | G2 wk 12 vaccine inj plasma      |
| 0.0706 | 0.0693 | 0.0608 | 0.0600 | 0.0598 | 0.0533 | G2 wk 12 vaccine inj plasma      |
| 0.0587 | 0.0588 | 0.0537 | 0.0582 | 0.0533 | 0.0532 | G2 wk 12 vaccine inj plasma      |
| 0.0540 | 0.0529 | 0.0501 | 0.0518 | 0.0518 | 0.0498 | G2 wk 12 vaccine inj plasma      |
| 0.0518 | 0.0509 | 0.0497 | 0.0504 | 0.0508 | 0.0503 | G2 wk 12 vaccine inj plasma      |
| 0.0530 | 0.0513 | 0.0496 | 0.0524 | 0.0557 | 0.0518 | G2 wk 12 vaccine inj plasma      |
| 0.0507 | 0.0520 | 0.0510 | 0.0534 | 0.0544 | 0.0477 | G2 wk 12 vaccine inj plasma      |
|        |        |        |        |        |        |                                  |
| 0.3513 | 0.2820 | 0.1943 | 0.2260 | 0.0963 | 0.0846 | G2 wk 12 vaccine inj sera        |
| 0.1614 | 0.1183 | 0.0811 | 0.1019 | 0.0667 | 0.0651 | G2 wk 12 vaccine inj sera        |
| 0.0828 | 0.0719 | 0.0601 | 0.0666 | 0.0574 | 0.0555 | G2 wk 12 vaccine inj sera        |
| 0.0594 | 0.0550 | 0.0540 | 0.0530 | 0.0530 | 0.0539 | G2 wk 12 vaccine inj sera        |
| 0.0555 | 0.0537 | 0.0588 | 0.0556 | 0.0535 | 0.0537 | G2 wk 12 vaccine inj sera        |
| 0.0540 | 0.0528 | 0.0570 | 0.0523 | 0.0518 | 0.0512 | G2 wk 12 vaccine inj sera        |
| 0.0516 | 0.0558 | 0.0509 | 0.0503 | 0.0532 | 0.0544 | G2 wk 12 vaccine inj sera        |
| 0.0513 | 0.0532 | 0.0507 | 0.0523 | 0.0549 | 0.0541 | G2 wk 12 vaccine inj sera        |
|        |        |        |        |        |        |                                  |

|        |        |        |        |        |        |                                   |
|--------|--------|--------|--------|--------|--------|-----------------------------------|
| 1.4887 | 1.3239 | 1.4842 | 1.5810 | 1.2514 | 0.6199 | G2 wk14 (2wk post vaccine boost)  |
| 1.1521 | 0.9358 | 1.1970 | 1.2173 | 0.7310 | 0.5042 | G2 wk14 (2wk post vaccine boost)  |
| 0.7105 | 0.5066 | 0.7147 | 0.7272 | 0.3570 | 0.2058 | G2 wk14 (2wk post vaccine boost)  |
| 0.3258 | 0.2284 | 0.3440 | 0.3522 | 0.1545 | 0.0971 | G2 wk14 (2wk post vaccine boost)  |
| 0.1344 | 0.1063 | 0.1426 | 0.1470 | 0.0737 | 0.0645 | G2 wk14 (2wk post vaccine boost)  |
| 0.0717 | 0.0608 | 0.0698 | 0.0775 | 0.0551 | 0.0543 | G2 wk14 (2wk post vaccine boost)  |
| 0.0574 | 0.0527 | 0.0556 | 0.0576 | 0.0507 | 0.0506 | G2 wk14 (2wk post vaccine boost)  |
| 0.0602 | 0.0499 | 0.0499 | 0.0509 | 0.0498 | 0.0625 | G2 wk14 (2wk post vaccine boost)  |
|        |        |        |        |        |        |                                   |
| 1.2029 | 1.2271 | 1.3883 | 1.3567 | 0.9110 | 0.6543 | G2 wk 16 (4wk post vaccine boost) |
| 0.8549 | 0.7704 | 0.9073 | 0.8127 | 0.4660 | 0.3494 | G2 wk 16 (4wk post vaccine boost) |
| 0.3983 | 0.3096 | 0.4514 | 0.3659 | 0.1784 | 0.1414 | G2 wk 16 (4wk post vaccine boost) |
| 0.1649 | 0.1324 | 0.1930 | 0.1371 | 0.0791 | 0.0767 | G2 wk 16 (4wk post vaccine boost) |
| 0.0785 | 0.0737 | 0.0923 | 0.0725 | 0.0570 | 0.0578 | G2 wk 16 (4wk post vaccine boost) |
| 0.0580 | 0.0570 | 0.0603 | 0.0605 | 0.0536 | 0.0659 | G2 wk 16 (4wk post vaccine boost) |
| 0.0555 | 0.0517 | 0.0547 | 0.0518 | 0.0516 | 0.0496 | G2 wk 16 (4wk post vaccine boost) |
| 0.0490 | 0.0496 | 0.0487 | 0.0471 | 0.0476 | 0.0485 | G2 wk 16 (4wk post vaccine boost) |
|        |        |        |        |        |        |                                   |
| 0.0868 | 0.1265 | 0.2642 | 0.0700 | 0.1770 | 0.6317 | G3 D 0                            |
| 0.0622 | 0.0760 | 0.1138 | 0.0675 | 0.0913 | 0.2148 | G3 D 0                            |
| 0.0540 | 0.0556 | 0.0978 | 0.0549 | 0.0704 | 0.1012 | G3 D 0                            |
| 0.0497 | 0.0509 | 0.0536 | 0.0511 | 0.0541 | 0.0636 | G3 D 0                            |
| 0.0498 | .0492  | 0.0502 | 0.0496 | 0.0503 | 0.0532 | G3 D 0                            |
| 0.0480 | 0.0479 | 0.0472 | 0.0489 | 0.0494 | 0.0495 | G3 D 0                            |
| 0.0483 | 0.0489 | 0.0465 | 0.0492 | 0.0495 | 0.0509 | G3 D 0                            |
| 0.0486 | 0.0492 | 0.0489 | 0.0490 | 0.0515 | 0.0489 | G3 D 0                            |
|        |        |        |        |        |        |                                   |
| 1.4078 | 1.4259 | 1.4821 | 1.4802 | 1.5740 | 1.4775 | G3 2 wk post vaccine              |
| 1.3010 | 1.1865 | 1.3806 | 1.1495 | 1.2524 | 1.0539 | G3 2 wk post vaccine              |

|        |        |        |        |        |        |                                   |
|--------|--------|--------|--------|--------|--------|-----------------------------------|
| 0.7482 | 0.6564 | 1.0243 | 0.7279 | 0.8556 | 0.6002 | G3 2 wk post vaccine              |
| 0.3429 | 0.2932 | 0.5373 | 0.2798 | 0.4176 | 0.2818 | G3 2 wk post vaccine              |
| 0.1405 | 0.1139 | 0.2044 | 0.1248 | 0.1859 | 0.1163 | G3 2 wk post vaccine              |
| 0.0803 | 0.0674 | 0.0905 | 0.0767 | 0.0831 | 0.0685 | G3 2 wk post vaccine              |
| 0.0604 | 0.0541 | 0.0609 | 0.0556 | 0.0600 | 0.0562 | G3 2 wk post vaccine              |
| 0.0535 | 0.0504 | 0.0522 | 0.0495 | 0.0500 | 0.0495 | G3 2 wk post vaccine              |
|        |        |        |        |        |        |                                   |
| 1.6883 | 1.4328 | 1.6327 | 1.5153 | 1.1655 | 1.5919 | G3 4 wk post vaccine              |
| 1.2044 | 1.0720 | 1.2535 | 1.0635 | 0.5364 | 1.2221 | G3 4 wk post vaccine              |
| 0.6538 | 0.5910 | 0.7332 | 0.6462 | 0.2506 | 0.7155 | G3 4 wk post vaccine              |
| 0.2924 | 0.2737 | 0.3366 | 0.3385 | 0.1140 | 0.3516 | G3 4 wk post vaccine              |
| 0.1341 | 0.1200 | 0.1475 | 0.1781 | 0.0722 | 0.1726 | G3 4 wk post vaccine              |
| 0.0754 | 0.0705 | 0.0724 | 0.1053 | 0.0553 | 0.0903 | G3 4 wk post vaccine              |
| 0.0570 | 0.0546 | 0.0553 | 0.4828 | 0.0513 | 0.0661 | G3 4 wk post vaccine              |
| 0.0522 | 0.0526 | 0.0504 | 0.0631 | 0.0519 | 0.0548 | G3 4 wk post vaccine              |
|        |        |        |        |        |        |                                   |
| 1.6685 | 1.7737 | 1.7288 | 1.5673 | 1.5809 | 1.5530 | G3 wk 6 (2 wk post 2nd boost)     |
| 1.7429 | 1.8112 | 1.8457 | 1.7132 | 1.7792 | 1.8967 | G3 wk 6 (2 wk post 2nd boost)     |
| 1.5259 | 1.7908 | 1.7333 | 1.6470 | 1.4949 | 1.6027 | G3 wk 6 (2 wk post 2nd boost)     |
| 1.0671 | 1.6048 | 1.5291 | 1.2192 | 1.1567 | 1.2010 | G3 wk 6 (2 wk post 2nd boost)     |
| 0.6010 | 1.2114 | 1.1384 | 0.7688 | 0.6650 | 0.7300 | G3 wk 6 (2 wk post 2nd boost)     |
| 0.2845 | 0.7279 | 0.7660 | 0.3673 | 0.2911 | 0.3730 | G3 wk 6 (2 wk post 2nd boost)     |
| 0.1401 | 0.3811 | 0.5984 | 0.1884 | 0.1365 | 0.1879 | G3 wk 6 (2 wk post 2nd boost)     |
| 0.0865 | 0.1683 | 0.3022 | 0.0943 | 0.0799 | 0.1099 | G3 wk 6 (2 wk post 2nd boost)     |
|        |        |        |        |        |        |                                   |
| 1.6606 | 1.7075 | 1.7782 | 1.6602 | 0.0522 | 1.6853 | G3 wk 12 (8 wk post second boost) |
| 1.0812 | 1.4485 | 1.5411 | 1.3166 | 0.0515 | 1.3623 | G3 wk 12 (8 wk post second boost) |
| 0.5177 | 0.8706 | 1.0228 | 0.7680 | 0.0559 | 0.9023 | G3 wk 12 (8 wk post second boost) |
| 0.2324 | 0.4168 | 0.4960 | 0.3776 | 0.0516 | 0.4423 | G3 wk 12 (8 wk post second boost) |
| 0.1083 | 0.1888 | 0.2196 | 0.1687 | 0.0526 | 0.1882 | G3 wk 12 (8 wk post second boost) |
| 0.0729 | 0.0954 | 0.1084 | 0.0966 | 0.0503 | 0.0996 | G3 wk 12 (8 wk post second boost) |
| 0.0586 | 0.0674 | 0.2465 | 0.0656 | 0.0495 | 0.0692 | G3 wk 12 (8 wk post second boost) |
| 0.0526 | 0.0566 | 0.0559 | 0.0592 | 0.0512 | 0.0546 | G3 wk 12 (8 wk post second boost) |
|        |        |        |        |        |        |                                   |

|        |        |        |        |        |        |                                |
|--------|--------|--------|--------|--------|--------|--------------------------------|
| 1.8034 | 1.8273 | 1.6233 | 1.7313 | 0.0508 | 1.7529 | G3 wk 14 (2 wk post 3rd boost) |
| 1.6442 | 1.8094 | 1.7514 | 1.7062 | 0.0484 | 1.7359 | G3 wk 14 (2 wk post 3rd boost) |
| 1.2005 | 1.6160 | 1.6484 | 1.3801 | 0.0507 | 1.4153 | G3 wk 14 (2 wk post 3rd boost) |
| 0.6486 | 1.1853 | 1.2210 | 0.8196 | 0.0520 | 0.9608 | G3 wk 14 (2 wk post 3rd boost) |
| 0.3118 | 0.6692 | 0.6955 | 0.4156 | 0.0528 | 0.5087 | G3 wk 14 (2 wk post 3rd boost) |
| 0.1354 | 0.3032 | 0.3391 | 0.1804 | 0.0497 | 0.2195 | G3 wk 14 (2 wk post 3rd boost) |
| 0.0868 | 0.1606 | 0.1629 | 0.0969 | 0.0516 | 0.1110 | G3 wk 14 (2 wk post 3rd boost) |
| 0.0633 | 0.0930 | 0.1044 | 0.0714 | 0.0501 | 0.0773 | G3 wk 14 (2 wk post 3rd boost) |
| 0.2817 | 0.3698 | 1.4092 | 0.1514 | 0.4006 | 0.1711 | G4 D 0                         |
| 0.0976 | 0.1518 | 0.9188 | 0.0930 | 0.1186 | 0.0773 | G4 D 0                         |
| 0.0634 | 0.0816 | 0.4047 | 0.0623 | 0.0791 | 0.0602 | G4 D 0                         |
| 0.0542 | 0.0595 | 0.1796 | 0.0543 | 0.0598 | 0.0523 | G4 D 0                         |
| 0.0536 | 0.0552 | 0.0905 | 0.0548 | 0.0545 | 0.0537 | G4 D 0                         |
| 0.0496 | 0.0512 | 0.0578 | 0.0494 | 0.0518 | 0.0515 | G4 D 0                         |
| 0.0522 | 0.0510 | 0.0526 | 0.0500 | 0.0501 | 0.0512 | G4 D 0                         |
| 0.0503 | 0.0506 | 0.0491 | 0.0524 | 0.0532 | 0.0491 | G4 D 0                         |
| 1.2077 | 1.5774 | 1.7095 | 1.5908 | 1.2735 | 1.0230 | G4 2 wk post vaccine           |
| 0.6725 | 1.0658 | 1.4830 | 1.1651 | 0.8374 | 0.5347 | G4 2 wk post vaccine           |
| 0.3312 | 0.6937 | 1.2187 | 0.8281 | 0.4065 | 0.2236 | G4 2 wk post vaccine           |
| 0.1489 | 0.3143 | 0.8376 | 0.3910 | 0.1750 | 0.1019 | G4 2 wk post vaccine           |
| 0.0739 | 0.1306 | 0.4216 | 0.1649 | 0.0818 | 0.0641 | G4 2 wk post vaccine           |
| 0.0590 | 0.0704 | 0.1770 | 0.0871 | 0.0633 | 0.0542 | G4 2 wk post vaccine           |
| 0.0523 | 0.0548 | 0.0891 | 0.0616 | 0.0534 | 0.0516 | G4 2 wk post vaccine           |
| 0.0506 | 0.0507 | 0.0586 | 0.0527 | 0.0493 | 0.0500 | G4 2 wk post vaccine           |



|        |        |        |        |        |        |                                   |
|--------|--------|--------|--------|--------|--------|-----------------------------------|
| 1.3367 | 1.3722 | 1.6993 | 1.5934 | 1.2465 | 1.0728 | G 4 wk post vaccine               |
| 0.5111 | 0.7226 | 1.5440 | 0.9916 | 0.5968 | 0.4496 | G 4 wk post vaccine               |
| 0.2527 | 0.3469 | 1.1588 | 0.5810 | 0.2742 | 0.2059 | G 4 wk post vaccine               |
| 0.1075 | 0.1514 | 0.6566 | 0.2574 | 0.1204 | 0.1064 | G 4 wk post vaccine               |
| 0.0710 | 0.0801 | 0.3123 | 0.1214 | 0.0749 | 0.0698 | G 4 wk post vaccine               |
| 0.0569 | 0.0586 | 0.1265 | 0.0751 | 0.0574 | 0.0569 | G 4 wk post vaccine               |
| 0.0540 | 0.0536 | 0.0740 | 0.0581 | 0.0554 | 0.0522 | G 4 wk post vaccine               |
| 0.0510 | 0.0516 | 0.0648 | 0.0563 | 0.0539 | 0.0515 | G 4 wk post vaccine               |
|        |        |        |        |        |        |                                   |
| 1.6010 | 1.5573 | 1.5373 | 1.5200 | 1.5242 | 1.5311 | G4 wk 6 (2 wk post 2nd boost)     |
| 1.8266 | 2.0331 | 1.9512 | 1.9156 | 1.8654 | 1.7977 | G4 wk 6 (2 wk post 2nd boost)     |
| 1.5310 | 1.6149 | 1.6193 | 1.5181 | 1.4541 | 1.3539 | G4 wk 6 (2 wk post 2nd boost)     |
| 1.1853 | 1.5240 | 1.6714 | 1.6359 | 1.2077 | 0.9188 | G4 wk 6 (2 wk post 2nd boost)     |
| 0.7101 | 1.0766 | 1.4553 | 1.3037 | 0.6589 | 0.4360 | G4 wk 6 (2 wk post 2nd boost)     |
| 0.2916 | 0.5072 | 0.9140 | 0.7105 | 0.2536 | 0.2159 | G4 wk 6 (2 wk post 2nd boost)     |
| 0.1390 | 0.2317 | 0.5639 | 0.3780 | 0.1294 | 0.1092 | G4 wk 6 (2 wk post 2nd boost)     |
| 0.0915 | 0.1134 | 0.2654 | 0.1857 | 0.0777 | 0.0772 | G4 wk 6 (2 wk post 2nd boost)     |
|        |        |        |        |        |        |                                   |
| 1.2885 | 1.3728 | 1.6423 | 1.7569 | 1.2545 | 1.4190 | G4 wk 12 (8 wk post second boost) |
| 0.6921 | 0.8691 | 1.3888 | 1.6192 | 0.8867 | 0.8347 | G4 wk 12 (8 wk post second boost) |
| 0.3316 | 0.4560 | 1.0447 | 1.2220 | 0.3777 | 0.4459 | G4 wk 12 (8 wk post second boost) |
| 0.1468 | 0.2263 | 0.6886 | 0.7728 | 0.1608 | 0.2124 | G4 wk 12 (8 wk post second boost) |
| 0.0805 | 0.1111 | 0.3718 | 0.3206 | 0.0858 | 0.1184 | G4 wk 12 (8 wk post second boost) |
| 0.0713 | 0.0683 | 0.1446 | 0.1727 | 0.0666 | 0.0788 | G4 wk 12 (8 wk post second boost) |
| 0.0582 | 0.0634 | 0.1023 | 0.1155 | 0.0584 | 0.0582 | G4 wk 12 (8 wk post second boost) |
| 0.0557 | 0.0559 | 0.0669 | 0.0732 | 0.0548 | 0.0538 | G4 wk 12 (8 wk post second boost) |
|        |        |        |        |        |        |                                   |

|        |        |        |        |        |        |                                |
|--------|--------|--------|--------|--------|--------|--------------------------------|
| 1.6479 | 1.6276 | 1.5532 | 1.6810 | 1.7629 | 1.5283 | G4 wk 14 (2 wk post 3rd boost) |
| 1.4669 | 1.7767 | 1.7096 | 1.5734 | 1.3735 | 1.3365 | G4 wk 14 (2 wk post 3rd boost) |
| 1.0279 | 1.4029 | 1.2580 | 1.4242 | 0.9390 | 1.0522 | G4 wk 14 (2 wk post 3rd boost) |
| 0.5489 | 0.9327 | 1.0062 | 1.0655 | 0.4421 | 0.4740 | G4 wk 14 (2 wk post 3rd boost) |
| 0.2863 | 0.4962 | 0.6186 | 0.6823 | 0.2101 | 0.2556 | G4 wk 14 (2 wk post 3rd boost) |
| 0.1488 | 0.2851 | 0.3581 | 0.3754 | 0.1190 | 0.1284 | G4 wk 14 (2 wk post 3rd boost) |
| 0.0724 | 0.1252 | 0.1734 | 0.1976 | 0.0749 | 0.0759 | G4 wk 14 (2 wk post 3rd boost) |
| 0.0659 | 0.0891 | 0.1058 | 0.1155 | 0.0636 | 0.0616 | G4 wk 14 (2 wk post 3rd boost) |
