# Supplementary material for: HIV-1 T cell epitopes targeted to Rhesus macaque CD40 and DCIR: A comparative study of prototype dendritic cell targeting therapeutic vaccine candidates
Source: PubMed Central journal article supplement (PMC6267996; doi:10.1371/journal.pone.0207794), 2018-11-30
Supplement: pone.0207794.s011.pdf [file pone.0207794.s011.pdf]

|        |   |      |                       |      |        |   |      |                       |      |        |   |      |                       |      |        |   |      |                       |      |
|--------|---|------|-----------------------|------|--------|---|------|-----------------------|------|--------|---|------|-----------------------|------|--------|---|------|-----------------------|------|
| 3.4.13 | 1 | R370 | p2/p6/p7 pool 1       | 0    | 3.4.13 | 2 | R376 | p2/p6/p7 pool 1       | 0    | 3.4.13 | 3 | R368 | p2/p6/p7 pool 1       | 0    | 3.4.13 | 4 | R386 | p2/p6/p7 pool 1       | 5    |
| 3.4.13 | 1 | R370 | p2/p6/p7 pool 2       | 0    | 3.4.13 | 2 | R376 | p2/p6/p7 pool 2       | 0    | 3.4.13 | 3 | R368 | p2/p6/p7 pool 2       | 0    | 3.4.13 | 4 | R386 | p2/p6/p7 pool 2       | 5    |
| 3.4.13 | 1 | R370 | p2/p6/p7 pool 3       | 0    | 3.4.13 | 2 | R376 | p2/p6/p7 pool 3       | 0    | 3.4.13 | 3 | R368 | p2/p6/p7 pool 3       | 0    | 3.4.13 | 4 | R386 | p2/p6/p7 pool 3       | 5    |
| 3.4.13 | 1 | R370 | p17 pool 1            | 0    | 3.4.13 | 2 | R376 | p17 pool 1            | 0    | 3.4.13 | 3 | R368 | p17 pool 1            | 0    | 3.4.13 | 4 | R386 | p17 pool 1            | 15   |
| 3.4.13 | 1 | R370 | p17 pool 2            | 0    | 3.4.13 | 2 | R376 | p17 pool 2            | 0    | 3.4.13 | 3 | R368 | p17 pool 2            | 0    | 3.4.13 | 4 | R386 | p17 pool 2            | 5    |
| 3.4.13 | 1 | R370 | p17 pool 3            | 0    | 3.4.13 | 2 | R376 | p17 pool 3            | 0    | 3.4.13 | 3 | R368 | p17 pool 3            | 0    | 3.4.13 | 4 | R386 | p17 pool 3            | 10   |
| 3.4.13 | 1 | R370 | pol pool 1            | 0    | 3.4.13 | 2 | R376 | pol pool 1            | 0    | 3.4.13 | 3 | R368 | pol pool 1            | 0    | 3.4.13 | 4 | R386 | pol pool 1            | 20   |
| 3.4.13 | 1 | R370 | pol pool 2            | 0    | 3.4.13 | 2 | R376 | pol pool 2            | 10   | 3.4.13 | 3 | R368 | pol pool 2            | 0    | 3.4.13 | 4 | R386 | pol pool 2            | 25   |
| 3.4.13 | 1 | R370 | pol pool 3            | 0    | 3.4.13 | 2 | R376 | pol pool 3            | 5    | 3.4.13 | 3 | R368 | pol pool 3            | 0    | 3.4.13 | 4 | R386 | pol pool 3            | 0    |
| 3.4.13 | 1 | R370 | pol pool 4            | 0    | 3.4.13 | 2 | R376 | pol pool 4            | 5    | 3.4.13 | 3 | R368 | pol pool 4            | 0    | 3.4.13 | 4 | R386 | pol pool 4            | 5    |
| 3.4.13 | 1 | R370 | nef pool 1            | 0    | 3.4.13 | 2 | R376 | nef pool 1            | 0    | 3.4.13 | 3 | R368 | nef pool 1            | 0    | 3.4.13 | 4 | R386 | nef pool 1            | 10   |
| 3.4.13 | 1 | R370 | nef pool 2            | 0    | 3.4.13 | 2 | R376 | nef pool 2            | 5    | 3.4.13 | 3 | R368 | nef pool 2            | 0    | 3.4.13 | 4 | R386 | nef pool 2            | 15   |
| 3.4.13 | 1 | R370 | nef pool 3            | 0    | 3.4.13 | 2 | R376 | nef pool 3            | 0    | 3.4.13 | 3 | R368 | nef pool 3            | 0    | 3.4.13 | 4 | R386 | nef pool 3            | 5    |
| 3.4.13 | 1 | R370 | hlgG4-HIV5sep         | 0    | 3.4.13 | 2 | R376 | hlgG4-HIV5sep         | 0    | 3.4.13 | 3 | R368 | hlgG4-HIV5sep         | 0    | 3.4.13 | 4 | R386 | hlgG4-HIV5sep         | 10   |
| 3.4.13 | 1 | R370 | hlgG4                 | 0    | 3.4.13 | 2 | R376 | hlgG4                 | 0    | 3.4.13 | 3 | R368 | hlgG4                 | 0    | 3.4.13 | 4 | R386 | hlgG4                 | 30   |
| 3.4.13 | 1 | R370 | Cohesin-nef66 (C1077) | 0    | 3.4.13 | 2 | R376 | Cohesin-nef66 (C1077) | 0    | 3.4.13 | 3 | R368 | Cohesin-nef66 (C1077) | 0    | 3.4.13 | 4 | R386 | Cohesin-nef66 (C1077) | 10   |
| 3.4.13 | 1 | R370 | Cohesin-nef66 (C1078) | 0    | 3.4.13 | 2 | R376 | Cohesin-nef66 (C1078) | 0    | 3.4.13 | 3 | R368 | Cohesin-nef66 (C1078) | 5    | 3.4.13 | 4 | R386 | Cohesin-nef66 (C1078) | 10   |
| 3.4.13 | 1 | R370 | Cohesin-gag17         | 0    | 3.4.13 | 2 | R376 | Cohesin-gag17         | 0    | 3.4.13 | 3 | R368 | Cohesin-gag17         | 0    | 3.4.13 | 4 | R386 | Cohesin-gag17         | 25   |
| 3.4.13 | 1 | R370 | Cohesin-gag253        | 0    | 3.4.13 | 2 | R376 | Cohesin-gag253        | 5    | 3.4.13 | 3 | R368 | Cohesin-gag253        | 0    | 3.4.13 | 4 | R386 | Cohesin-gag253        | 10   |
| 3.4.13 | 1 | R370 | Cohesin-pol158        | 0    | 3.4.13 | 2 | R376 | Cohesin-pol158        | 5    | 3.4.13 | 3 | R368 | Cohesin-pol158        | 0    | 3.4.13 | 4 | R386 | Cohesin-pol158        | 5    |
| 3.4.13 | 1 | R370 | Cohesin               | 5    | 3.4.13 | 2 | R376 | Cohesin               | 0    | 3.4.13 | 3 | R368 | Cohesin               | 0    | 3.4.13 | 4 | R386 | Cohesin               | 10   |
| 3.4.13 | 1 | R370 | pha                   | 2200 | 3.4.13 | 2 | R376 | pha                   | 2600 | 3.4.13 | 3 | R368 | pha                   | 2540 | 3.4.13 | 4 | R386 | pha                   | TNTC |
| 3.4.13 | 1 | R371 | Non                   | 0    | 3.4.13 | 2 | R377 | Non                   | 0    | 3.4.13 | 3 | R375 | Non                   | 0    | 3.4.13 | 4 | R389 | Non                   | 0    |
| 3.4.13 | 1 | R371 | p24 pool 1            | 0    | 3.4.13 | 2 | R377 | p24 pool 1            | 0    | 3.4.13 | 3 | R375 | p24 pool 1            | 10   | 3.4.13 | 4 | R389 | p24 pool 1            | 0    |
| 3.4.13 | 1 | R371 | p24 pool 2            | 5    | 3.4.13 | 2 | R377 | p24 pool 2            | 0    | 3.4.13 | 3 | R375 | p24 pool 2            | 0    | 3.4.13 | 4 | R389 | p24 pool 2            | 0    |
| 3.4.13 | 1 | R371 | p24 pool 3            | 10   | 3.4.13 | 2 | R377 | p24 pool 3            | 0    | 3.4.13 | 3 | R375 | p24 pool 3            | 0    | 3.4.13 | 4 | R389 | p24 pool 3            | 10   |
| 3.4.13 | 1 | R371 | p24 pool 4            | 5    | 3.4.13 | 2 | R377 | p24 pool 4            | 0    | 3.4.13 | 3 | R375 | p24 pool 4            | 10   | 3.4.13 | 4 | R389 | p24 pool 4            | 15   |
| 3.4.13 | 1 | R371 | p24 pool 5            | 0    | 3.4.13 | 2 | R377 | p24 pool 5            | 0    | 3.4.13 | 3 | R375 | p24 pool 5            | 0    | 3.4.13 | 4 | R389 | p24 pool 5            | 15   |
| 3.4.13 | 1 | R371 | p2/p6/p7 pool 1       | 0    | 3.4.13 | 2 | R377 | p2/p6/p7 pool 1       | 20   | 3.4.13 | 3 | R375 | p2/p6/p7 pool 1       | 0    | 3.4.13 | 4 | R389 | p2/p6/p7 pool 1       | 0    |
| 3.4.13 | 1 | R371 | p2/p6/p7 pool 2       | 0    | 3.4.13 | 2 | R377 | p2/p6/p7 pool 2       | 0    | 3.4.13 | 3 | R375 | p2/p6/p7 pool 2       | 5    | 3.4.13 | 4 | R389 | p2/p6/p7 pool 2       | 0    |
| 3.4.13 | 1 | R371 | p2/p6/p7 pool 3       | 0    | 3.4.13 | 2 | R377 | p2/p6/p7 pool 3       | 0    | 3.4.13 | 3 | R375 | p2/p6/p7 pool 3       | 0    | 3.4.13 | 4 | R389 | p2/p6/p7 pool 3       | 15   |
| 3.4.13 | 1 | R371 | p17 pool 1            | 0    | 3.4.13 | 2 | R377 | p17 pool 1            | 0    | 3.4.13 | 3 | R375 | p17 pool 1            | 0    | 3.4.13 | 4 | R389 | p17 pool 1            | 0    |
| 3.4.13 | 1 | R371 | p17 pool 2            | 0    | 3.4.13 | 2 | R377 | p17 pool 2            | 0    | 3.4.13 | 3 | R375 | p17 pool 2            | 10   | 3.4.13 | 4 | R389 | p17 pool 2            | 5    |
| 3.4.13 | 1 | R371 | p17 pool 3            | 0    | 3.4.13 | 2 | R377 | p17 pool 3            | 0    | 3.4.13 | 3 | R375 | p17 pool 3            | 0    | 3.4.13 | 4 | R389 | p17 pool 3            | 0    |
| 3.4.13 | 1 | R371 | pol pool 1            | 0    | 3.4.13 | 2 | R377 | pol pool 1            | 0    | 3.4.13 | 3 | R375 | pol pool 1            | 5    | 3.4.13 | 4 | R389 | pol pool 1            | 15   |
| 3.4.13 | 1 | R371 | pol pool 2            | 5    | 3.4.13 | 2 | R377 | pol pool 2            | 125  | 3.4.13 | 3 | R375 | pol pool 2            | 25   | 3.4.13 | 4 | R389 | pol pool 2            | 65   |
| 3.4.13 | 1 | R371 | pol pool 3            | 0    | 3.4.13 | 2 | R377 | pol pool 3            | 15   | 3.4.13 | 3 | R375 | pol pool 3            | 15   | 3.4.13 | 4 | R389 | pol pool 3            | 0    |
| 3.4.13 | 1 | R371 | pol pool 4            | 0    | 3.4.13 | 2 | R377 | pol pool 4            | 0    | 3.4.13 | 3 | R375 | pol pool 4            | 0    | 3.4.13 | 4 | R389 | pol pool 4            | 0    |
| 3.4.13 | 1 | R371 | nef pool 1            | 0    | 3.4.13 | 2 | R377 | nef pool 1            | 0    | 3.4.13 | 3 | R375 | nef pool 1            | 5    | 3.4.13 | 4 | R389 | nef pool 1            | 5    |
| 3.4.13 | 1 | R371 | nef pool 2            | 0    | 3.4.13 | 2 | R377 | nef pool 2            | 10   | 3.4.13 | 3 | R375 | nef pool 2            | 10   | 3.4.13 | 4 | R389 | nef pool 2            | 10   |
| 3.4.13 | 1 | R371 | nef pool 3            | 25   | 3.4.13 | 2 | R377 | nef pool 3            | 135  | 3.4.13 | 3 | R375 | nef pool 3            | 0    | 3.4.13 | 4 | R389 | nef pool 3            | 0    |
| 3.4.13 | 1 | R371 | hlgG4-HIV5sep         | 10   | 3.4.13 | 2 | R377 | hlgG4-HIV5sep         | 0    | 3.4.13 | 3 | R375 | hlgG4-HIV5sep         | 5    | 3.4.13 | 4 | R389 | hlgG4-HIV5sep         | 30   |
| 3.4.13 | 1 | R371 | hlgG4                 | 0    | 3.4.13 | 2 | R377 | hlgG4                 | 0    | 3.4.13 | 3 | R375 | hlgG4                 | 20   | 3.4.13 | 4 | R389 | hlgG4                 | 25   |
| 3.4.13 | 1 | R371 | Cohesin-nef66 (C1077) | 0    | 3.4.13 | 2 | R377 | Cohesin-nef66 (C1077) | 0    | 3.4.13 | 3 | R375 | Cohesin-nef66 (C1077) | 0    | 3.4.13 | 4 | R389 | Cohesin-nef66 (C1077) | 0    |
| 3.4.13 | 1 | R371 | Cohesin-nef66 (C1078) | 0    | 3.4.13 | 2 | R377 | Cohesin-nef66 (C1078) | 0    | 3.4.13 | 3 | R375 | Cohesin-nef66 (C1078) | 15   | 3.4.13 | 4 | R389 | Cohesin-nef66 (C1078) | 35   |
| 3.4.13 | 1 | R371 | Cohesin-gag17         | 0    | 3.4.13 | 2 | R377 | Cohesin-gag17         | 0    | 3.4.13 | 3 | R375 | Cohesin-gag17         | 20   | 3.4.13 | 4 | R389 | Cohesin-gag17         | 15   |
| 3.4.13 | 1 | R371 | Cohesin-gag253        | 15   | 3.4.13 | 2 | R377 | Cohesin-gag253        | 0    | 3.4.13 | 3 | R375 | Cohesin-gag253        | 0    | 3.4.13 | 4 | R389 | Cohesin-gag253        | 20   |
| 3.4.13 | 1 | R371 | Cohesin-pol158        | 0    | 3.4.13 | 2 | R377 | Cohesin-pol158        | 0    | 3.4.13 | 3 | R375 | Cohesin-pol158        | 5    | 3.4.13 | 4 | R389 | Cohesin-pol158        | 0    |
| 3.4.13 | 1 | R371 | Cohesin               | 0    | 3.4.13 | 2 | R377 | Cohesin               | 0    | 3.4.13 | 3 | R375 | Cohesin               | 5    | 3.4.13 | 4 | R389 | Cohesin               | 5    |
| 3.4.13 | 1 | R371 | pha                   | 3235 | 3.4.13 | 2 | R377 | pha                   | 3315 | 3.4.13 | 3 | R375 | pha                   | 2080 | 3.4.13 | 4 | R389 | pha                   | TNTC |
| 3.4.13 | 1 | R373 | Non                   | 0    | 3.4.13 | 2 | R378 | Non                   | 0    | 3.4.13 | 3 | R379 | Non                   | 0    | 3.4.13 | 4 | R390 | Non                   | 0    |
| 3.4.13 | 1 | R373 | p24 pool 1            | 0    | 3.4.13 | 2 | R378 | p24 pool 1            | 0    | 3.4.13 | 3 | R379 | p24 pool 1            | 0    | 3.4.13 | 4 | R390 | p24 pool 1            | 0    |
| 3.4.13 | 1 | R373 | p24 pool 2            | 0    | 3.4.13 | 2 | R378 | p24 pool 2            | 0    | 3.4.13 | 3 | R379 | p24 pool 2            | 0    | 3.4.13 | 4 | R390 | p24 pool 2            | 0    |
| 3.4.13 | 1 | R373 | p24 pool 3            | 0    | 3.4.13 | 2 | R378 | p24 pool 3            | 0    | 3.4.13 | 3 | R379 | p24 pool 3            | 10   | 3.4.13 | 4 | R390 | p24 pool 3            | 5    |
| 3.4.13 | 1 | R373 | p24 pool 4            | 0    | 3.4.13 | 2 | R378 | p24 pool 4            | 0    | 3.4.13 | 3 | R379 | p24 pool 4            | 0    | 3.4.13 | 4 | R390 | p24 pool 4            | 0    |
| 3.4.13 | 1 | R373 | p24 pool 5            | 10   | 3.4.13 | 2 | R378 | p24 pool 5            | 0    | 3.4.13 | 3 | R379 | p24 pool 5            | 0    | 3.4.13 | 4 | R390 | p24 pool 5            | 0    |
| 3.4.13 | 1 | R373 | p2/p6/p7 pool 1       | 5    | 3.4.13 | 2 | R378 | p2/p6/p7 pool 1       | 0    | 3.4.13 | 3 | R379 | p2/p6/p7 pool 1       | 0    | 3.4.13 | 4 | R390 | p2/p6/p7 pool 1       | 5    |
| 3.4.13 | 1 | R373 | p2/p6/p7 pool 2       | 0    | 3.4.13 | 2 | R378 | p2/p6/p7 pool 2       | 0    | 3.4.13 | 3 | R379 | p2/p6/p7 pool 2       | 0    | 3.4.13 | 4 | R390 | p2/p6/p7 pool 2       | 0    |
| 3.4.13 | 1 | R373 | p2/p6/p7 pool 3       | 0    | 3.4.13 | 2 | R378 | p2/p6/p7 pool 3       | 0    | 3.4.13 | 3 | R379 | p2/p6/p7 pool 3       | 10   | 3.4.13 | 4 | R390 | p2/p6/p7 pool 3       | 0    |
| 3.4.13 | 1 | R373 | p17 pool 1            | 0    | 3.4.13 | 2 | R378 | p17 pool 1            | 0    | 3.4.13 | 3 | R379 | p17 pool 1            | 0    | 3.4.13 | 4 | R390 | p17 pool 1            | 10   |
| 3.4.13 | 1 | R373 | p17 pool 2            | 0    | 3.4.13 | 2 | R378 | p17 pool 2            | 0    | 3.4.13 | 3 | R379 | p17 pool 2            | 5    | 3.4.13 | 4 | R390 | p17 pool 2            | 5    |
| 3.4.13 | 1 | R373 | p17 pool 3            | 0    | 3.4.13 | 2 | R378 | p17 pool 3            | 0    | 3.4.13 | 3 | R379 | p17 pool 3            | 0    | 3.4.13 | 4 | R390 | p17 pool 3            | 0    |
| 3.4.13 | 1 | R373 | pol pool 1            | 0    | 3.4.13 | 2 | R378 | pol pool 1            | 0    | 3.4.13 | 3 | R379 | pol pool 1            | 0    | 3.4.13 | 4 | R390 | pol pool 1            | 15   |
| 3.4.13 | 1 | R373 | pol pool 2            | 0    | 3.4.13 | 2 | R378 | pol pool 2            | 0    | 3.4.13 | 3 | R379 | pol pool 2            | 5    | 3.4.13 | 4 | R390 | pol pool 2            | 20   |
| 3.4.13 | 1 | R373 | pol pool 3            | 0    | 3.4.13 | 2 | R378 | pol pool 3            | 0    | 3.4.13 | 3 | R379 | pol pool 3            | 5    | 3.4.13 | 4 | R390 | pol pool 3            | 5    |
| 3.4.13 | 1 | R373 | pol pool 4            | 0    | 3.4.13 | 2 | R378 | pol pool 4            | 0    | 3.4.13 | 3 | R379 | pol pool 4            | 0    | 3.4.13 | 4 | R390 | pol pool 4            | 5    |
| 3.4.13 | 1 | R373 | nef pool 1            | 0    | 3.4.13 | 2 | R378 | nef pool 1            | 0    | 3.4.13 | 3 | R379 | nef pool 1            | 0    | 3.4.13 | 4 | R390 | nef pool 1            | 0    |
| 3.4.13 | 1 | R373 | nef pool 2            | 0    | 3.4.13 | 2 | R378 | nef pool 2            | 0    | 3.4.13 | 3 | R379 | nef pool 2            | 0    | 3.4.13 | 4 | R390 | nef pool 2            | 0    |
| 3.4.13 | 1 | R373 | nef pool 3            | 0    | 3.4.13 | 2 | R378 | nef pool 3            | 0    | 3.4.13 | 3 | R379 | nef pool 3            | 0    | 3.4.13 | 4 | R390 | nef pool 3            | 0    |
| 3.4.13 | 1 | R373 | hlgG4-HIV5sep         | 0    | 3.4.13 | 2 | R378 | hlgG4-HIV5sep         | 0    | 3.4.13 | 3 | R379 | hlgG4-HIV5sep         | 0    | 3.4.13 | 4 | R390 | hlgG4-HIV5sep         | 10   |
| 3.4.13 | 1 | R373 | hlgG4                 | 0    | 3.4.13 | 2 | R378 | hlgG4                 | 0    | 3.4.13 | 3 | R379 | hlgG4                 | 0    | 3.4.13 | 4 | R390 | hlgG4                 | 10   |
| 3.4.13 | 1 | R373 | Cohesin-nef66 (C1077) | 0    | 3.4.13 | 2 | R378 | Cohesin-nef6          |      |        |   |      |                       |      |        |   |      |                       |      |

|         |        |                       |      |         |        |                       |      |          |        |                       |      |        |        |                       |      |
|---------|--------|-----------------------|------|---------|--------|-----------------------|------|----------|--------|-----------------------|------|--------|--------|-----------------------|------|
| 3.4.13  | 1 R374 | p17 pool 2            | 10   | 3.4.13  | 2 R380 | p17 pool 2            | 0    | 3.4.13   | 3 R381 | p17 pool 2            | 10   | 3.4.13 | 4 R391 | p17 pool 2            | 15   |
| 3.4.13  | 1 R374 | p17 pool 3            | 10   | 3.4.13  | 2 R380 | p17 pool 3            | 0    | 3.4.13   | 3 R381 | p17 pool 3            | 5    | 3.4.13 | 4 R391 | p17 pool 3            | 15   |
| 3.4.13  | 1 R374 | pol pool 1            | 0    | 3.4.13  | 2 R380 | pol pool 1            | 0    | 3.4.13   | 3 R381 | pol pool 1            | 0    | 3.4.13 | 4 R391 | pol pool 1            | 45   |
| 3.4.13  | 1 R374 | pol pool 2            | 5    | 3.4.13  | 2 R380 | pol pool 2            | 5    | 3.4.13   | 3 R381 | pol pool 2            | 50   | 3.4.13 | 4 R391 | pol pool 2            | 215  |
| 3.4.13  | 1 R374 | pol pool 3            | 5    | 3.4.13  | 2 R380 | pol pool 3            | 0    | 3.4.13   | 3 R381 | pol pool 3            | 0    | 3.4.13 | 4 R391 | pol pool 3            | 25   |
| 3.4.13  | 1 R374 | pol pool 4            | 0    | 3.4.13  | 2 R380 | pol pool 4            | 0    | 3.4.13   | 3 R381 | pol pool 4            | 10   | 3.4.13 | 4 R391 | pol pool 4            | 15   |
| 3.4.13  | 1 R374 | nef pool 1            | 0    | 3.4.13  | 2 R380 | nef pool 1            | 0    | 3.4.13   | 3 R381 | nef pool 1            | 5    | 3.4.13 | 4 R391 | nef pool 1            | 25   |
| 3.4.13  | 1 R374 | nef pool 2            | 0    | 3.4.13  | 2 R380 | nef pool 2            | 0    | 3.4.13   | 3 R381 | nef pool 2            | 5    | 3.4.13 | 4 R391 | nef pool 2            | 0    |
| 3.4.13  | 1 R374 | nef pool 3            | 20   | 3.4.13  | 2 R380 | nef pool 3            | 5    | 3.4.13   | 3 R381 | nef pool 3            | 5    | 3.4.13 | 4 R391 | nef pool 3            | 45   |
| 3.4.13  | 1 R374 | hlgG4-HIV5sep         | 10   | 3.4.13  | 2 R380 | hlgG4-HIV5sep         | 0    | 3.4.13   | 3 R381 | hlgG4-HIV5sep         | 10   | 3.4.13 | 4 R391 | hlgG4-HIV5sep         | 35   |
| 3.4.13  | 1 R374 | hlgG4                 | 0    | 3.4.13  | 2 R380 | hlgG4                 | 5    | 3.4.13   | 3 R381 | hlgG4                 | 5    | 3.4.13 | 4 R391 | hlgG4                 | 40   |
| 3.4.13  | 1 R374 | Cohesin-nef66 (C1077) | 0    | 3.4.13  | 2 R380 | Cohesin-nef66 (C1077) | 0    | 3.4.13   | 3 R381 | Cohesin-nef66 (C1077) | 5    | 3.4.13 | 4 R391 | Cohesin-nef66 (C1077) | 85   |
| 3.4.13  | 1 R374 | Cohesin-nef66 (C1078) | 10   | 3.4.13  | 2 R380 | Cohesin-nef66 (C1078) | 15   | 3.4.13   | 3 R381 | Cohesin-nef66 (C1078) | 10   | 3.4.13 | 4 R391 | Cohesin-nef66 (C1078) | 80   |
| 3.4.13  | 1 R374 | Cohesin-gag17         | 5    | 3.4.13  | 2 R380 | Cohesin-gag17         | 0    | 3.4.13   | 3 R381 | Cohesin-gag17         | 5    | 3.4.13 | 4 R391 | Cohesin-gag17         | 80   |
| 3.4.13  | 1 R374 | Cohesin-gag253        | 5    | 3.4.13  | 2 R380 | Cohesin-gag253        | 10   | 3.4.13   | 3 R381 | Cohesin-gag253        | 0    | 3.4.13 | 4 R391 | Cohesin-gag253        | 70   |
| 3.4.13  | 1 R374 | Cohesin-pol158        | 0    | 3.4.13  | 2 R380 | Cohesin-pol158        | 0    | 3.4.13   | 3 R381 | Cohesin-pol158        | 5    | 3.4.13 | 4 R391 | Cohesin-pol158        | 5    |
| 3.4.13  | 1 R374 | Cohesin               | 0    | 3.4.13  | 2 R380 | Cohesin               | 5    | 3.4.13   | 3 R381 | Cohesin               | 5    | 3.4.13 | 4 R391 | Cohesin               | 25   |
| 3.4.13  | 1 R374 | pha                   | 3310 | 3.4.13  | 2 R380 | pha                   | 2095 | 3.4.13   | 3 R381 | pha                   | 2245 | 3.4.13 | 4 R391 | pha                   | TNTC |
| 3.4.13  | 1 R369 | Non                   | 0    | 3.4.13  | 2 R382 | Non                   | 0    | 3.4.13   | 3 R387 | Non                   | 0    | 3.4.13 | 4 R372 | Non                   | 0    |
| 3.4.13  | 1 R369 | p24 pool 1            | 20   | 3.4.13  | 2 R382 | p24 pool 1            | 10   | 3.4.13   | 3 R387 | p24 pool 1            | 0    | 3.4.13 | 4 R372 | p24 pool 1            | 0    |
| 3.4.13  | 1 R369 | p24 pool 2            | 55   | 3.4.13  | 2 R382 | p24 pool 2            | 15   | 3.4.13   | 3 R387 | p24 pool 2            | 0    | 3.4.13 | 4 R372 | p24 pool 2            | 0    |
| 3.4.13  | 1 R369 | p24 pool 3            | 15   | 3.4.13  | 2 R382 | p24 pool 3            | 0    | 3.4.13   | 3 R387 | p24 pool 3            | 5    | 3.4.13 | 4 R372 | p24 pool 3            | 0    |
| 3.4.13  | 1 R369 | p24 pool 4            | 5    | 3.4.13  | 2 R382 | p24 pool 4            | 5    | 3.4.13   | 3 R387 | p24 pool 4            | 0    | 3.4.13 | 4 R372 | p24 pool 4            | 0    |
| 3.4.13  | 1 R369 | p24 pool 5            | 10   | 3.4.13  | 2 R382 | p24 pool 5            | 25   | 3.4.13   | 3 R387 | p24 pool 5            | 0    | 3.4.13 | 4 R372 | p24 pool 5            | 0    |
| 3.4.13  | 1 R369 | p2/p6/p7 pool 1       | 20   | 3.4.13  | 2 R382 | p2/p6/p7 pool 1       | 15   | 3.4.13   | 3 R387 | p2/p6/p7 pool 1       | 0    | 3.4.13 | 4 R372 | p2/p6/p7 pool 1       | 0    |
| 3.4.13  | 1 R369 | p2/p6/p7 pool 2       | 5    | 3.4.13  | 2 R382 | p2/p6/p7 pool 2       | 5    | 3.4.13   | 3 R387 | p2/p6/p7 pool 2       | 0    | 3.4.13 | 4 R372 | p2/p6/p7 pool 2       | 0    |
| 3.4.13  | 1 R369 | p2/p6/p7 pool 3       | 10   | 3.4.13  | 2 R382 | p2/p6/p7 pool 3       | 5    | 3.4.13   | 3 R387 | p2/p6/p7 pool 3       | 0    | 3.4.13 | 4 R372 | p2/p6/p7 pool 3       | 0    |
| 3.4.13  | 1 R369 | p17 pool 1            | 10   | 3.4.13  | 2 R382 | p17 pool 1            | 5    | 3.4.13   | 3 R387 | p17 pool 1            | 0    | 3.4.13 | 4 R372 | p17 pool 1            | 0    |
| 3.4.13  | 1 R369 | p17 pool 2            | 15   | 3.4.13  | 2 R382 | p17 pool 2            | 0    | 3.4.13   | 3 R387 | p17 pool 2            | 0    | 3.4.13 | 4 R372 | p17 pool 2            | 5    |
| 3.4.13  | 1 R369 | p17 pool 3            | 5    | 3.4.13  | 2 R382 | p17 pool 3            | 5    | 3.4.13   | 3 R387 | p17 pool 3            | 0    | 3.4.13 | 4 R372 | p17 pool 3            | 0    |
| 3.4.13  | 1 R369 | pol pool 1            | 15   | 3.4.13  | 2 R382 | pol pool 1            | 10   | 3.4.13   | 3 R387 | pol pool 1            | 0    | 3.4.13 | 4 R372 | pol pool 1            | 5    |
| 3.4.13  | 1 R369 | pol pool 2            | 20   | 3.4.13  | 2 R382 | pol pool 2            | 40   | 3.4.13   | 3 R387 | pol pool 2            | 5    | 3.4.13 | 4 R372 | pol pool 2            | 20   |
| 3.4.13  | 1 R369 | pol pool 3            | 10   | 3.4.13  | 2 R382 | pol pool 3            | 50   | 3.4.13   | 3 R387 | pol pool 3            | 0    | 3.4.13 | 4 R372 | pol pool 3            | 0    |
| 3.4.13  | 1 R369 | pol pool 4            | 10   | 3.4.13  | 2 R382 | pol pool 4            | 10   | 3.4.13   | 3 R387 | pol pool 4            | 0    | 3.4.13 | 4 R372 | pol pool 4            | 0    |
| 3.4.13  | 1 R369 | nef pool 1            | 5    | 3.4.13  | 2 R382 | nef pool 1            | 20   | 3.4.13   | 3 R387 | nef pool 1            | 0    | 3.4.13 | 4 R372 | nef pool 1            | 0    |
| 3.4.13  | 1 R369 | nef pool 2            | 20   | 3.4.13  | 2 R382 | nef pool 2            | 0    | 3.4.13   | 3 R387 | nef pool 2            | 0    | 3.4.13 | 4 R372 | nef pool 2            | 0    |
| 3.4.13  | 1 R369 | nef pool 3            | 40   | 3.4.13  | 2 R382 | nef pool 3            | 45   | 3.4.13   | 3 R387 | nef pool 3            | 5    | 3.4.13 | 4 R372 | nef pool 3            | 0    |
| 3.4.13  | 1 R369 | hlgG4-HIV5sep         | 25   | 3.4.13  | 2 R382 | hlgG4-HIV5sep         | 0    | 3.4.13   | 3 R387 | hlgG4-HIV5sep         | 5    | 3.4.13 | 4 R372 | hlgG4-HIV5sep         | 0    |
| 3.4.13  | 1 R369 | hlgG4                 | 0    | 3.4.13  | 2 R382 | hlgG4                 | 0    | 3.4.13   | 3 R387 | hlgG4                 | 0    | 3.4.13 | 4 R372 | hlgG4                 | 0    |
| 3.4.13  | 1 R369 | Cohesin-nef66 (C1077) | 5    | 3.4.13  | 2 R382 | Cohesin-nef66 (C1077) | 5    | 3.4.13   | 3 R387 | Cohesin-nef66 (C1077) | 5    | 3.4.13 | 4 R372 | Cohesin-nef66 (C1077) | 0    |
| 3.4.13  | 1 R369 | Cohesin-nef66 (C1078) | 15   | 3.4.13  | 2 R382 | Cohesin-nef66 (C1078) | 0    | 3.4.13   | 3 R387 | Cohesin-nef66 (C1078) | 0    | 3.4.13 | 4 R372 | Cohesin-nef66 (C1078) | 20   |
| 3.4.13  | 1 R369 | Cohesin-gag17         | 20   | 3.4.13  | 2 R382 | Cohesin-gag17         | 15   | 3.4.13   | 3 R387 | Cohesin-gag17         | 0    | 3.4.13 | 4 R372 | Cohesin-gag17         | 0    |
| 3.4.13  | 1 R369 | Cohesin-gag253        | 20   | 3.4.13  | 2 R382 | Cohesin-gag253        | 10   | 3.4.13   | 3 R387 | Cohesin-gag253        | 5    | 3.4.13 | 4 R372 | Cohesin-gag253        | 5    |
| 3.4.13  | 1 R369 | Cohesin-pol158        | 20   | 3.4.13  | 2 R382 | Cohesin-pol158        | 20   | 3.4.13   | 3 R387 | Cohesin-pol158        | 5    | 3.4.13 | 4 R372 | Cohesin-pol158        | 0    |
| 3.4.13  | 1 R369 | Cohesin               | 30   | 3.4.13  | 2 R382 | Cohesin               | 5    | 3.4.13   | 3 R387 | Cohesin               | 0    | 3.4.13 | 4 R372 | Cohesin               | 0    |
| 3.4.13  | 1 R369 | pha                   | 2875 | 3.4.13  | 2 R382 | pha                   | 3105 | 3.4.13   | 3 R387 | pha                   | TNTC | 3.4.13 | 4 R372 | pha                   | 2325 |
| 3.4.13  | 1 R385 | Non                   | 0    | 3.4.13  | 2 R384 | Non                   | 0    | 3.4.13   | 3 R388 | Non                   | 0    | 3.4.13 | 4 R383 | Non                   | 0    |
| 3.4.13  | 1 R385 | p24 pool 1            | 0    | 3.4.13  | 2 R384 | p24 pool 1            | 0    | 3.4.13   | 3 R388 | p24 pool 1            | 0    | 3.4.13 | 4 R383 | p24 pool 1            | 5    |
| 3.4.13  | 1 R385 | p24 pool 2            | 5    | 3.4.13  | 2 R384 | p24 pool 2            | 10   | 3.4.13   | 3 R388 | p24 pool 2            | 0    | 3.4.13 | 4 R383 | p24 pool 2            | 0    |
| 3.4.13  | 1 R385 | p24 pool 3            | 0    | 3.4.13  | 2 R384 | p24 pool 3            | 0    | 3.4.13   | 3 R388 | p24 pool 3            | 15   | 3.4.13 | 4 R383 | p24 pool 3            | 15   |
| 3.4.13  | 1 R385 | p24 pool 4            | 0    | 3.4.13  | 2 R384 | p24 pool 4            | 0    | 3.4.13   | 3 R388 | p24 pool 4            | 0    | 3.4.13 | 4 R383 | p24 pool 4            | 0    |
| 3.4.13  | 1 R385 | p24 pool 5            | 0    | 3.4.13  | 2 R384 | p24 pool 5            | 0    | 3.4.13   | 3 R388 | p24 pool 5            | 0    | 3.4.13 | 4 R383 | p24 pool 5            | 0    |
| 3.4.13  | 1 R385 | p2/p6/p7 pool 1       | 0    | 3.4.13  | 2 R384 | p2/p6/p7 pool 1       | 0    | 3.4.13   | 3 R388 | p2/p6/p7 pool 1       | 5    | 3.4.13 | 4 R383 | p2/p6/p7 pool 1       | 5    |
| 3.4.13  | 1 R385 | p2/p6/p7 pool 2       | 0    | 3.4.13  | 2 R384 | p2/p6/p7 pool 2       | 5    | 3.4.13   | 3 R388 | p2/p6/p7 pool 2       | 0    | 3.4.13 | 4 R383 | p2/p6/p7 pool 2       | 0    |
| 3.4.13  | 1 R385 | p2/p6/p7 pool 3       | 0    | 3.4.13  | 2 R384 | p2/p6/p7 pool 3       | 0    | 3.4.13   | 3 R388 | p2/p6/p7 pool 3       | 0    | 3.4.13 | 4 R383 | p2/p6/p7 pool 3       | 0    |
| 3.4.13  | 1 R385 | p17 pool 1            | 0    | 3.4.13  | 2 R384 | p17 pool 1            | 15   | 3.4.13   | 3 R388 | p17 pool 1            | 0    | 3.4.13 | 4 R383 | p17 pool 1            | 5    |
| 3.4.13  | 1 R385 | p17 pool 2            | 0    | 3.4.13  | 2 R384 | p17 pool 2            | 5    | 3.4.13   | 3 R388 | p17 pool 2            | 0    | 3.4.13 | 4 R383 | p17 pool 2            | 0    |
| 3.4.13  | 1 R385 | p17 pool 3            | 0    | 3.4.13  | 2 R384 | p17 pool 3            | 0    | 3.4.13   | 3 R388 | p17 pool 3            | 0    | 3.4.13 | 4 R383 | p17 pool 3            | 0    |
| 3.4.13  | 1 R385 | pol pool 1            | 0    | 3.4.13  | 2 R384 | pol pool 1            | 0    | 3.4.13   | 3 R388 | pol pool 1            | 0    | 3.4.13 | 4 R383 | pol pool 1            | 5    |
| 3.4.13  | 1 R385 | pol pool 2            | 25   | 3.4.13  | 2 R384 | pol pool 2            | 5    | 3.4.13   | 3 R388 | pol pool 2            | 30   | 3.4.13 | 4 R383 | pol pool 2            | 10   |
| 3.4.13  | 1 R385 | pol pool 3            | 0    | 3.4.13  | 2 R384 | pol pool 3            | 0    | 3.4.13   | 3 R388 | pol pool 3            | 0    | 3.4.13 | 4 R383 | pol pool 3            | 5    |
| 3.4.13  | 1 R385 | pol pool 4            | 0    | 3.4.13  | 2 R384 | pol pool 4            | 5    | 3.4.13   | 3 R388 | pol pool 4            | 0    | 3.4.13 | 4 R383 | pol pool 4            | 5    |
| 3.4.13  | 1 R385 | nef pool 1            | 0    | 3.4.13  | 2 R384 | nef pool 1            | 0    | 3.4.13   | 3 R388 | nef pool 1            | 0    | 3.4.13 | 4 R383 | nef pool 1            | 5    |
| 3.4.13  | 1 R385 | nef pool 2            | 0    | 3.4.13  | 2 R384 | nef pool 2            | 5    | 3.4.13   | 3 R388 | nef pool 2            | 0    | 3.4.13 | 4 R383 | nef pool 2            | 0    |
| 3.4.13  | 1 R385 | nef pool 3            | 0    | 3.4.13  | 2 R384 | nef pool 3            | 15   | 3.4.13   | 3 R388 | nef pool 3            | 0    | 3.4.13 | 4 R383 | nef pool 3            | 0    |
| 3.4.13  | 1 R385 | hlgG4-HIV5sep         | 0    | 3.4.13  | 2 R384 | hlgG4-HIV5sep         | 5    | 3.4.13   | 3 R388 | hlgG4-HIV5sep         | 20   | 3.4.13 | 4 R383 | hlgG4-HIV5sep         | 0    |
| 3.4.13  | 1 R385 | hlgG4                 | 0    | 3.4.13  | 2 R384 | hlgG4                 | 0    | 3.4.13   | 3 R388 | hlgG4                 | 0    | 3.4.13 | 4 R383 | hlgG4                 | 5    |
| 3.4.13  | 1 R385 | Cohesin-nef66 (C1077) | 0    | 3.4.13  | 2 R384 | Cohesin-nef66 (C1077) | 0    | 3.4.13   | 3 R388 | Cohesin-nef66 (C1077) | 15   | 3.4.13 | 4 R383 | Cohesin-nef66 (C1077) | 5    |
| 3.4.13  | 1 R385 | Cohesin-nef66 (C1078) | 0    | 3.4.13  | 2 R384 | Cohesin-nef66 (C1078) | 5    | 3.4.13   | 3 R388 | Cohesin-nef66 (C1078) | 85   | 3.4.13 | 4 R383 | Cohesin-nef66 (C1078) | 0    |
| 3.4.13  | 1 R385 | Cohesin-gag17         | 0    | 3.4.13  | 2 R384 | Cohesin-gag17         | 0    | 3.4.13   | 3 R388 | Cohesin-gag17         | 10   | 3.4.13 | 4 R383 | Cohesin-gag17         | 0    |
| 3.4.13  | 1 R385 | Cohesin-gag253        | 0    | 3.4.13  | 2 R384 | Cohesin-gag253        | 15   | 3.4.13   | 3 R388 | Cohesin-gag253        | 35   | 3.4.13 | 4 R383 | Cohesin-gag253        | 10   |
| 3.4.13  | 1 R385 | Cohesin-pol158        | 0    | 3.4.13  | 2 R384 | Cohesin-pol158        | 0    | 3.4.13   | 3 R388 | Cohesin-pol158        | 55   | 3.4.13 | 4 R383 | Cohesin-pol158        | 0    |
| 3.4.13  | 1 R385 | Cohesin               | 0    | 3.4.13  | 2 R384 | Cohesin               | 0    | 3.4.13   | 3 R388 | Cohesin               | 0    | 3.4.13 | 4 R383 | Cohesin               | 0    |
| 3.4.13  | 1 R385 | pha                   | 2420 | 3.4.13  | 2 R384 | pha                   | 2745 | 3.4.13   | 3 R388 | pha                   | TNTC | 3.4.13 | 4 R383 | pha                   | 2050 |
| 4.29.13 | 1 R370 | Non                   | 0    | 4.29.13 | 2 R376 | Non                   | 0    | 4.2.13   | 3 R368 | Non                   | 0    | 4.2.13 | 4 R386 | Non                   | 0    |
| 4.29.13 | 1 R370 | p24 pool 1            | 5    | 4.29.13 | 2 R376 | p24 pool 1            | 140  | 4.2.13   | 3 R368 | p24 pool 1            | 0    | 4.2.13 | 4 R386 | p24 pool 1            | 5    |
| 4.29.13 | 1 R370 | p24 pool 2            | 5    | 4.29.13 | 2 R376 | p24 pool 2            | 0    | 4.2.13   | 3 R368 | p24 pool 2            | 0    | 4.2.13 | 4 R386 | p24 pool 2            | 5    |
| 4.29.13 | 1 R370 | p24 pool 3            | 0    | 4.29.13 | 2 R376 | p24 pool 3            | 0    | 4.2.13   | 3 R368 | p24 pool 3            | 0    | 4.2.13 | 4 R386 | p24 pool 3            | 30   |
| 4.29.13 | 1 R370 | p24 pool 4            | 0    | 4.29.13 | 2 R376 | p24 pool 4            | 0    | 4.2.13</ |        |                       |      |        |        |                       |      |

|         |        |                       |      |         |        |                       |      |        |        |                       |      |        |        |                       |      |
|---------|--------|-----------------------|------|---------|--------|-----------------------|------|--------|--------|-----------------------|------|--------|--------|-----------------------|------|
| 4.29.13 | 1 R370 | pol pool 2            | 5    | 4.29.13 | 2 R376 | pol pool 2            | 0    | 4.2.13 | 3 R368 | pol pool 2            | 5    | 4.2.13 | 4 R386 | pol pool 2            | 20   |
| 4.29.13 | 1 R370 | pol pool 3            | 0    | 4.29.13 | 2 R376 | pol pool 3            | 0    | 4.2.13 | 3 R368 | pol pool 3            | 30   | 4.2.13 | 4 R386 | pol pool 3            | 0    |
| 4.29.13 | 1 R370 | pol pool 4            | 0    | 4.29.13 | 2 R376 | pol pool 4            | 0    | 4.2.13 | 3 R368 | pol pool 4            | 0    | 4.2.13 | 4 R386 | pol pool 4            | 0    |
| 4.29.13 | 1 R370 | nef pool 1            | 0    | 4.29.13 | 2 R376 | nef pool 1            | 0    | 4.2.13 | 3 R368 | nef pool 1            | 0    | 4.2.13 | 4 R386 | nef pool 1            | 0    |
| 4.29.13 | 1 R370 | nef pool 2            | 0    | 4.29.13 | 2 R376 | nef pool 2            | 0    | 4.2.13 | 3 R368 | nef pool 2            | 15   | 4.2.13 | 4 R386 | nef pool 2            | 0    |
| 4.29.13 | 1 R370 | nef pool 3            | 10   | 4.29.13 | 2 R376 | nef pool 3            | 0    | 4.2.13 | 3 R368 | nef pool 3            | 0    | 4.2.13 | 4 R386 | nef pool 3            | 5    |
| 4.29.13 | 1 R370 | hlgG4-HIV5sep         | 0    | 4.29.13 | 2 R376 | hlgG4-HIV5sep         | 0    | 4.2.13 | 3 R368 | hlgG4-HIV5sep         | 5    | 4.2.13 | 4 R386 | hlgG4-HIV5sep         | 10   |
| 4.29.13 | 1 R370 | hlgG4                 | 0    | 4.29.13 | 2 R376 | hlgG4                 | 0    | 4.2.13 | 3 R368 | hlgG4                 | 0    | 4.2.13 | 4 R386 | hlgG4                 | 5    |
| 4.29.13 | 1 R370 | Cohesin-nef66 (C1077) | 0    | 4.29.13 | 2 R376 | Cohesin-nef66 (C1077) | 0    | 4.2.13 | 3 R368 | Cohesin-nef66 (C1077) | 0    | 4.2.13 | 4 R386 | Cohesin-nef66 (C1077) | 10   |
| 4.29.13 | 1 R370 | Cohesin-nef66 (C1078) | 0    | 4.29.13 | 2 R376 | Cohesin-nef66 (C1078) | 0    | 4.2.13 | 3 R368 | Cohesin-nef66 (C1078) | 0    | 4.2.13 | 4 R386 | Cohesin-nef66 (C1078) | 5    |
| 4.29.13 | 1 R370 | Cohesin-gag17         | 0    | 4.29.13 | 2 R376 | Cohesin-gag17         | 0    | 4.2.13 | 3 R368 | Cohesin-gag17         | 35   | 4.2.13 | 4 R386 | Cohesin-gag17         | 10   |
| 4.29.13 | 1 R370 | Cohesin-gag253        | 0    | 4.29.13 | 2 R376 | Cohesin-gag253        | 0    | 4.2.13 | 3 R368 | Cohesin-gag253        | 0    | 4.2.13 | 4 R386 | Cohesin-gag253        | 10   |
| 4.29.13 | 1 R370 | Cohesin-pol158        | 0    | 4.29.13 | 2 R376 | Cohesin-pol158        | 0    | 4.2.13 | 3 R368 | Cohesin-pol158        | 5    | 4.2.13 | 4 R386 | Cohesin-pol158        | 0    |
| 4.29.13 | 1 R370 | Cohesin               | 0    | 4.29.13 | 2 R376 | Cohesin               | 0    | 4.2.13 | 3 R368 | Cohesin               | 0    | 4.2.13 | 4 R386 | Cohesin               | 5    |
| 4.29.13 | 1 R370 | pha                   | 1555 | 4.29.13 | 2 R376 | pha                   | 2565 | 4.2.13 | 3 R368 | pha                   | 2450 | 4.2.13 | 4 R386 | pha                   | 2910 |
| 4.29.13 | 1 R371 | Non                   | 0    | 4.29.13 | 2 R377 | Non                   | 0    | 4.2.13 | 3 R375 | Non                   | 0    | 4.2.13 | 4 R389 | Non                   | 0    |
| 4.29.13 | 1 R371 | p24 pool 1            | 120  | 4.29.13 | 2 R377 | p24 pool 1            | 0    | 4.2.13 | 3 R375 | p24 pool 1            | 5    | 4.2.13 | 4 R389 | p24 pool 1            | 10   |
| 4.29.13 | 1 R371 | p24 pool 2            | 65   | 4.29.13 | 2 R377 | p24 pool 2            | 45   | 4.2.13 | 3 R375 | p24 pool 2            | 5    | 4.2.13 | 4 R389 | p24 pool 2            | 5    |
| 4.29.13 | 1 R371 | p24 pool 3            | 0    | 4.29.13 | 2 R377 | p24 pool 3            | 0    | 4.2.13 | 3 R375 | p24 pool 3            | 5    | 4.2.13 | 4 R389 | p24 pool 3            | 40   |
| 4.29.13 | 1 R371 | p24 pool 4            | 0    | 4.29.13 | 2 R377 | p24 pool 4            | 0    | 4.2.13 | 3 R375 | p24 pool 4            | 15   | 4.2.13 | 4 R389 | p24 pool 4            | 15   |
| 4.29.13 | 1 R371 | p24 pool 5            | 0    | 4.29.13 | 2 R377 | p24 pool 5            | 0    | 4.2.13 | 3 R375 | p24 pool 5            | 5    | 4.2.13 | 4 R389 | p24 pool 5            | 5    |
| 4.29.13 | 1 R371 | p2/p6/p7 pool 1       | 15   | 4.29.13 | 2 R377 | p2/p6/p7 pool 1       | 0    | 4.2.13 | 3 R375 | p2/p6/p7 pool 1       | 10   | 4.2.13 | 4 R389 | p2/p6/p7 pool 1       | 5    |
| 4.29.13 | 1 R371 | p2/p6/p7 pool 2       | 0    | 4.29.13 | 2 R377 | p2/p6/p7 pool 2       | 0    | 4.2.13 | 3 R375 | p2/p6/p7 pool 2       | 15   | 4.2.13 | 4 R389 | p2/p6/p7 pool 2       | 10   |
| 4.29.13 | 1 R371 | p2/p6/p7 pool 3       | 0    | 4.29.13 | 2 R377 | p2/p6/p7 pool 3       | 0    | 4.2.13 | 3 R375 | p2/p6/p7 pool 3       | 5    | 4.2.13 | 4 R389 | p2/p6/p7 pool 3       | 5    |
| 4.29.13 | 1 R371 | p17 pool 1            | 0    | 4.29.13 | 2 R377 | p17 pool 1            | 0    | 4.2.13 | 3 R375 | p17 pool 1            | 0    | 4.2.13 | 4 R389 | p17 pool 1            | 0    |
| 4.29.13 | 1 R371 | p17 pool 2            | 0    | 4.29.13 | 2 R377 | p17 pool 2            | 0    | 4.2.13 | 3 R375 | p17 pool 2            | 0    | 4.2.13 | 4 R389 | p17 pool 2            | 10   |
| 4.29.13 | 1 R371 | p17 pool 3            | 0    | 4.29.13 | 2 R377 | p17 pool 3            | 0    | 4.2.13 | 3 R375 | p17 pool 3            | 0    | 4.2.13 | 4 R389 | p17 pool 3            | 10   |
| 4.29.13 | 1 R371 | pol pool 1            | 0    | 4.29.13 | 2 R377 | pol pool 1            | 0    | 4.2.13 | 3 R375 | pol pool 1            | 0    | 4.2.13 | 4 R389 | pol pool 1            | 5    |
| 4.29.13 | 1 R371 | pol pool 2            | 20   | 4.29.13 | 2 R377 | pol pool 2            | 10   | 4.2.13 | 3 R375 | pol pool 2            | 80   | 4.2.13 | 4 R389 | pol pool 2            | 90   |
| 4.29.13 | 1 R371 | pol pool 3            | 0    | 4.29.13 | 2 R377 | pol pool 3            | 5    | 4.2.13 | 3 R375 | pol pool 3            | 0    | 4.2.13 | 4 R389 | pol pool 3            | 10   |
| 4.29.13 | 1 R371 | pol pool 4            | 0    | 4.29.13 | 2 R377 | pol pool 4            | 0    | 4.2.13 | 3 R375 | pol pool 4            | 5    | 4.2.13 | 4 R389 | pol pool 4            | 15   |
| 4.29.13 | 1 R371 | nef pool 1            | 0    | 4.29.13 | 2 R377 | nef pool 1            | 0    | 4.2.13 | 3 R375 | nef pool 1            | 5    | 4.2.13 | 4 R389 | nef pool 1            | 5    |
| 4.29.13 | 1 R371 | nef pool 2            | 0    | 4.29.13 | 2 R377 | nef pool 2            | 0    | 4.2.13 | 3 R375 | nef pool 2            | 50   | 4.2.13 | 4 R389 | nef pool 2            | 10   |
| 4.29.13 | 1 R371 | nef pool 3            | 0    | 4.29.13 | 2 R377 | nef pool 3            | 70   | 4.2.13 | 3 R375 | nef pool 3            | 0    | 4.2.13 | 4 R389 | nef pool 3            | 15   |
| 4.29.13 | 1 R371 | hlgG4-HIV5sep         | 0    | 4.29.13 | 2 R377 | hlgG4-HIV5sep         | 0    | 4.2.13 | 3 R375 | hlgG4-HIV5sep         | 30   | 4.2.13 | 4 R389 | hlgG4-HIV5sep         | 10   |
| 4.29.13 | 1 R371 | hlgG4                 | 0    | 4.29.13 | 2 R377 | hlgG4                 | 0    | 4.2.13 | 3 R375 | hlgG4                 | 10   | 4.2.13 | 4 R389 | hlgG4                 | 10   |
| 4.29.13 | 1 R371 | Cohesin-nef66 (C1077) | 0    | 4.29.13 | 2 R377 | Cohesin-nef66 (C1077) | 0    | 4.2.13 | 3 R375 | Cohesin-nef66 (C1077) | 5    | 4.2.13 | 4 R389 | Cohesin-nef66 (C1077) | 10   |
| 4.29.13 | 1 R371 | Cohesin-nef66 (C1078) | 0    | 4.29.13 | 2 R377 | Cohesin-nef66 (C1078) | 0    | 4.2.13 | 3 R375 | Cohesin-nef66 (C1078) | 25   | 4.2.13 | 4 R389 | Cohesin-nef66 (C1078) | 15   |
| 4.29.13 | 1 R371 | Cohesin-gag17         | 0    | 4.29.13 | 2 R377 | Cohesin-gag17         | 35   | 4.2.13 | 3 R375 | Cohesin-gag17         | 170  | 4.2.13 | 4 R389 | Cohesin-gag17         | 90   |
| 4.29.13 | 1 R371 | Cohesin-gag253        | 20   | 4.29.13 | 2 R377 | Cohesin-gag253        | 0    | 4.2.13 | 3 R375 | Cohesin-gag253        | 10   | 4.2.13 | 4 R389 | Cohesin-gag253        | 15   |
| 4.29.13 | 1 R371 | Cohesin-pol158        | 5    | 4.29.13 | 2 R377 | Cohesin-pol158        | 20   | 4.2.13 | 3 R375 | Cohesin-pol158        | 0    | 4.2.13 | 4 R389 | Cohesin-pol158        | 5    |
| 4.29.13 | 1 R371 | Cohesin               | 5    | 4.29.13 | 2 R377 | Cohesin               | 0    | 4.2.13 | 3 R375 | Cohesin               | 0    | 4.2.13 | 4 R389 | Cohesin               | 0    |
| 4.29.13 | 1 R371 | pha                   | 3315 | 4.29.13 | 2 R377 | pha                   | TNTC | 4.2.13 | 3 R375 | pha                   | 2635 | 4.2.13 | 4 R389 | pha                   | 2145 |
| 4.29.13 | 1 R373 | Non                   | 0    | 4.29.13 | 2 R378 | Non                   | 0    | 4.2.13 | 3 R379 | Non                   | 0    | 4.2.13 | 4 R390 | Non                   | 0    |
| 4.29.13 | 1 R373 | p24 pool 1            | 0    | 4.29.13 | 2 R378 | p24 pool 1            | 0    | 4.2.13 | 3 R379 | p24 pool 1            | 15   | 4.2.13 | 4 R390 | p24 pool 1            | 0    |
| 4.29.13 | 1 R373 | p24 pool 2            | 0    | 4.29.13 | 2 R378 | p24 pool 2            | 20   | 4.2.13 | 3 R379 | p24 pool 2            | 5    | 4.2.13 | 4 R390 | p24 pool 2            | 5    |
| 4.29.13 | 1 R373 | p24 pool 3            | 5    | 4.29.13 | 2 R378 | p24 pool 3            | 0    | 4.2.13 | 3 R379 | p24 pool 3            | 65   | 4.2.13 | 4 R390 | p24 pool 3            | 10   |
| 4.29.13 | 1 R373 | p24 pool 4            | 10   | 4.29.13 | 2 R378 | p24 pool 4            | 0    | 4.2.13 | 3 R379 | p24 pool 4            | 35   | 4.2.13 | 4 R390 | p24 pool 4            | 10   |
| 4.29.13 | 1 R373 | p24 pool 5            | 5    | 4.29.13 | 2 R378 | p24 pool 5            | 0    | 4.2.13 | 3 R379 | p24 pool 5            | 0    | 4.2.13 | 4 R390 | p24 pool 5            | 5    |
| 4.29.13 | 1 R373 | p2/p6/p7 pool 1       | 5    | 4.29.13 | 2 R378 | p2/p6/p7 pool 1       | 15   | 4.2.13 | 3 R379 | p2/p6/p7 pool 1       | 10   | 4.2.13 | 4 R390 | p2/p6/p7 pool 1       | 5    |
| 4.29.13 | 1 R373 | p2/p6/p7 pool 2       | 0    | 4.29.13 | 2 R378 | p2/p6/p7 pool 2       | 0    | 4.2.13 | 3 R379 | p2/p6/p7 pool 2       | 5    | 4.2.13 | 4 R390 | p2/p6/p7 pool 2       | 0    |
| 4.29.13 | 1 R373 | p2/p6/p7 pool 3       | 0    | 4.29.13 | 2 R378 | p2/p6/p7 pool 3       | 0    | 4.2.13 | 3 R379 | p2/p6/p7 pool 3       | 10   | 4.2.13 | 4 R390 | p2/p6/p7 pool 3       | 5    |
| 4.29.13 | 1 R373 | p17 pool 1            | 0    | 4.29.13 | 2 R378 | p17 pool 1            | 0    | 4.2.13 | 3 R379 | p17 pool 1            | 5    | 4.2.13 | 4 R390 | p17 pool 1            | 0    |
| 4.29.13 | 1 R373 | p17 pool 2            | 0    | 4.29.13 | 2 R378 | p17 pool 2            | 0    | 4.2.13 | 3 R379 | p17 pool 2            | 10   | 4.2.13 | 4 R390 | p17 pool 2            | 0    |
| 4.29.13 | 1 R373 | p17 pool 3            | 0    | 4.29.13 | 2 R378 | p17 pool 3            | 0    | 4.2.13 | 3 R379 | p17 pool 3            | 5    | 4.2.13 | 4 R390 | p17 pool 3            | 0    |
| 4.29.13 | 1 R373 | pol pool 1            | 5    | 4.29.13 | 2 R378 | pol pool 1            | 0    | 4.2.13 | 3 R379 | pol pool 1            | 10   | 4.2.13 | 4 R390 | pol pool 1            | 0    |
| 4.29.13 | 1 R373 | pol pool 2            | 10   | 4.29.13 | 2 R378 | pol pool 2            | 20   | 4.2.13 | 3 R379 | pol pool 2            | 320  | 4.2.13 | 4 R390 | pol pool 2            | 10   |
| 4.29.13 | 1 R373 | pol pool 3            | 5    | 4.29.13 | 2 R378 | pol pool 3            | 0    | 4.2.13 | 3 R379 | pol pool 3            | 15   | 4.2.13 | 4 R390 | pol pool 3            | 0    |
| 4.29.13 | 1 R373 | pol pool 4            | 5    | 4.29.13 | 2 R378 | pol pool 4            | 0    | 4.2.13 | 3 R379 | pol pool 4            | 10   | 4.2.13 | 4 R390 | pol pool 4            | 0    |
| 4.29.13 | 1 R373 | nef pool 1            | 0    | 4.29.13 | 2 R378 | nef pool 1            | 10   | 4.2.13 | 3 R379 | nef pool 1            | 5    | 4.2.13 | 4 R390 | nef pool 1            | 5    |
| 4.29.13 | 1 R373 | nef pool 2            | 0    | 4.29.13 | 2 R378 | nef pool 2            | 0    | 4.2.13 | 3 R379 | nef pool 2            | 5    | 4.2.13 | 4 R390 | nef pool 2            | 5    |
| 4.29.13 | 1 R373 | nef pool 3            | 5    | 4.29.13 | 2 R378 | nef pool 3            | 0    | 4.2.13 | 3 R379 | nef pool 3            | 10   | 4.2.13 | 4 R390 | nef pool 3            | 5    |
| 4.29.13 | 1 R373 | hlgG4-HIV5sep         | 0    | 4.29.13 | 2 R378 | hlgG4-HIV5sep         | 0    | 4.2.13 | 3 R379 | hlgG4-HIV5sep         | 10   | 4.2.13 | 4 R390 | hlgG4-HIV5sep         | 15   |
| 4.29.13 | 1 R373 | hlgG4                 | 0    | 4.29.13 | 2 R378 | hlgG4                 | 0    | 4.2.13 | 3 R379 | hlgG4                 | 5    | 4.2.13 | 4 R390 | hlgG4                 | 10   |
| 4.29.13 | 1 R373 | Cohesin-nef66 (C1077) | 0    | 4.29.13 | 2 R378 | Cohesin-nef66 (C1077) | 10   | 4.2.13 | 3 R379 | Cohesin-nef66 (C1077) | 10   | 4.2.13 | 4 R390 | Cohesin-nef66 (C1077) | 10   |
| 4.29.13 | 1 R373 | Cohesin-nef66 (C1078) | 0    | 4.29.13 | 2 R378 | Cohesin-nef66 (C1078) | 0    | 4.2.13 | 3 R379 | Cohesin-nef66 (C1078) | 30   | 4.2.13 | 4 R390 | Cohesin-nef66 (C1078) | 30   |
| 4.29.13 | 1 R373 | Cohesin-gag17         | 5    | 4.29.13 | 2 R378 | Cohesin-gag17         | 0    | 4.2.13 | 3 R379 | Cohesin-gag17         | 125  | 4.2.13 | 4 R390 | Cohesin-gag17         | 10   |
| 4.29.13 | 1 R373 | Cohesin-gag253        | 0    | 4.29.13 | 2 R378 | Cohesin-gag253        | 20   | 4.2.13 | 3 R379 | Cohesin-gag253        | 5    | 4.2.13 | 4 R390 | Cohesin-gag253        | 10   |
| 4.29.13 | 1 R373 | Cohesin-pol158        | 30   | 4.29.13 | 2 R378 | Cohesin-pol158        | 20   | 4.2.13 | 3 R379 | Cohesin-pol158        | 5    | 4.2.13 | 4 R390 | Cohesin-pol158        | 5    |
| 4.29.13 | 1 R373 | Cohesin               | 5    | 4.29.13 | 2 R378 | Cohesin               | 0    | 4.2.13 | 3 R379 | Cohesin               | 5    | 4.2.13 | 4 R390 | Cohesin               | 0    |
| 4.29.13 | 1 R373 | pha                   | 2505 | 4.29.13 | 2 R378 | pha                   | 3225 | 4.2.13 | 3 R379 | pha                   | 2295 | 4.2.13 | 4 R390 | pha                   | 2570 |
| 4.29.13 | 1 R374 | Non                   | 0    | 4.29.13 | 2 R380 | Non                   | 0    | 4.2.13 | 3 R381 | Non                   | 0    | 4.2.13 | 4 R391 | Non                   | 0    |
| 4.29.13 | 1 R374 | p24 pool 1            | 10   | 4.29.13 | 2 R380 | p24 pool 1            | 10   | 4.2.13 | 3 R381 | p24 pool 1            | 0    | 4.2.13 | 4 R391 | p24 pool 1            | 10   |
| 4.29.13 | 1 R374 | p24 pool 2            | 55   | 4.29.13 | 2 R380 | p24 pool 2            | 20   | 4.2.13 | 3 R381 | p24 pool 2            | 1    | 4.2.13 | 4 R391 | p24 pool 2            | 15   |
| 4.29.13 | 1 R374 | p24 pool 3            | 0    | 4.29.13 | 2 R380 | p24 pool 3            | 0    | 4.2.13 | 3 R381 | p24 pool 3            | 5    | 4.2.13 | 4 R391 | p24 pool 3            | 35   |
| 4.29.13 | 1 R374 | p24 pool 4            | 0    | 4.29.13 | 2 R380 | p24 pool 4            | 5    | 4.2.13 | 3 R381 | p24 pool 4            | 0    | 4.2.13 | 4 R391 | p24 pool 4            | 15   |
| 4.29.13 | 1 R374 | p24 pool 5            | 0    | 4.29.13 | 2 R380 | p24 pool 5            | 5    | 4.2.13 | 3 R381 | p24 pool 5            | 0    | 4.2.13 | 4 R391 | p24 pool 5            | 20   |
| 4.29.13 | 1 R374 | p2/p6/p7 pool 1       | 0    | 4.29.13 | 2 R380 | p2/p6/p7 pool 1       | 5    | 4      |        |                       |      |        |        |                       |      |

|         |        |                       |      |         |        |                       |      |         |        |                       |      |         |        |                       |      |
|---------|--------|-----------------------|------|---------|--------|-----------------------|------|---------|--------|-----------------------|------|---------|--------|-----------------------|------|
| 4.29.13 | 1 R374 | nef pool 2            | 0    | 4.29.13 | 2 R380 | nef pool 2            | 10   | 4.2.13  | 3 R381 | nef pool 2            | 0    | 4.2.13  | 4 R391 | nef pool 2            | 25   |
| 4.29.13 | 1 R374 | nef pool 3            | 30   | 4.29.13 | 2 R380 | nef pool 3            | 10   | 4.2.13  | 3 R381 | nef pool 3            | 5    | 4.2.13  | 4 R391 | nef pool 3            | 30   |
| 4.29.13 | 1 R374 | hlgG4-HIV5sep         | 0    | 4.29.13 | 2 R380 | hlgG4-HIV5sep         | 0    | 4.2.13  | 3 R381 | hlgG4-HIV5sep         | 5    | 4.2.13  | 4 R391 | hlgG4-HIV5sep         | 45   |
| 4.29.13 | 1 R374 | hlgG4                 | 0    | 4.29.13 | 2 R380 | hlgG4                 | 0    | 4.2.13  | 3 R381 | hlgG4                 | 0    | 4.2.13  | 4 R391 | hlgG4                 | 10   |
| 4.29.13 | 1 R374 | Cohesin-nef66 (C1077) | 5    | 4.29.13 | 2 R380 | Cohesin-nef66 (C1077) | 10   | 4.2.13  | 3 R381 | Cohesin-nef66 (C1077) | 0    | 4.2.13  | 4 R391 | Cohesin-nef66 (C1077) | 5    |
| 4.29.13 | 1 R374 | Cohesin-nef66 (C1078) | 5    | 4.29.13 | 2 R380 | Cohesin-nef66 (C1078) | 10   | 4.2.13  | 3 R381 | Cohesin-nef66 (C1078) | 5    | 4.2.13  | 4 R391 | Cohesin-nef66 (C1078) | 95   |
| 4.29.13 | 1 R374 | Cohesin-gag17         | 0    | 4.29.13 | 2 R380 | Cohesin-gag17         | 5    | 4.2.13  | 3 R381 | Cohesin-gag17         | 155  | 4.2.13  | 4 R391 | Cohesin-gag17         | 45   |
| 4.29.13 | 1 R374 | Cohesin-gag253        | 0    | 4.29.13 | 2 R380 | Cohesin-gag253        | 10   | 4.2.13  | 3 R381 | Cohesin-gag253        | 0    | 4.2.13  | 4 R391 | Cohesin-gag253        | 5    |
| 4.29.13 | 1 R374 | Cohesin-pol158        | 5    | 4.29.13 | 2 R380 | Cohesin-pol158        | 5    | 4.2.13  | 3 R381 | Cohesin-pol158        | 0    | 4.2.13  | 4 R391 | Cohesin-pol158        | 0    |
| 4.29.13 | 1 R374 | Cohesin               | 0    | 4.29.13 | 2 R380 | Cohesin               | 5    | 4.2.13  | 3 R381 | Cohesin               | 0    | 4.2.13  | 4 R391 | Cohesin               | 0    |
| 4.29.13 | 1 R374 | pha                   | 2315 | 4.29.13 | 2 R380 | pha                   | 2970 | 4.2.13  | 3 R381 | pha                   | 2015 | 4.2.13  | 4 R391 | pha                   | 2805 |
| 4.29.13 | 1 R369 | Non                   | 0    | 4.29.13 | 2 R382 | Non                   | 0    | 4.2.13  | 3 R387 | Non                   | 0    | 4.2.13  | 4 R372 | Non                   | 0    |
| 4.29.13 | 1 R369 | p24 pool 1            | 0    | 4.29.13 | 2 R382 | p24 pool 1            | 0    | 4.2.13  | 3 R387 | p24 pool 1            | 0    | 4.2.13  | 4 R372 | p24 pool 1            | 5    |
| 4.29.13 | 1 R369 | p24 pool 2            | 150  | 4.29.13 | 2 R382 | p24 pool 2            | 0    | 4.2.13  | 3 R387 | p24 pool 2            | 0    | 4.2.13  | 4 R372 | p24 pool 2            | 5    |
| 4.29.13 | 1 R369 | p24 pool 3            | 5    | 4.29.13 | 2 R382 | p24 pool 3            | 0    | 4.2.13  | 3 R387 | p24 pool 3            | 35   | 4.2.13  | 4 R372 | p24 pool 3            | 35   |
| 4.29.13 | 1 R369 | p24 pool 4            | 0    | 4.29.13 | 2 R382 | p24 pool 4            | 0    | 4.2.13  | 3 R387 | p24 pool 4            | 0    | 4.2.13  | 4 R372 | p24 pool 4            | 15   |
| 4.29.13 | 1 R369 | p24 pool 5            | 5    | 4.29.13 | 2 R382 | p24 pool 5            | 0    | 4.2.13  | 3 R387 | p24 pool 5            | 0    | 4.2.13  | 4 R372 | p24 pool 5            | 5    |
| 4.29.13 | 1 R369 | p2/p6/p7 pool 1       | 5    | 4.29.13 | 2 R382 | p2/p6/p7 pool 1       | 0    | 4.2.13  | 3 R387 | p2/p6/p7 pool 1       | 0    | 4.2.13  | 4 R372 | p2/p6/p7 pool 1       | 10   |
| 4.29.13 | 1 R369 | p2/p6/p7 pool 2       | 0    | 4.29.13 | 2 R382 | p2/p6/p7 pool 2       | 0    | 4.2.13  | 3 R387 | p2/p6/p7 pool 2       | 0    | 4.2.13  | 4 R372 | p2/p6/p7 pool 2       | 0    |
| 4.29.13 | 1 R369 | p2/p6/p7 pool 3       | 0    | 4.29.13 | 2 R382 | p2/p6/p7 pool 3       | 0    | 4.2.13  | 3 R387 | p2/p6/p7 pool 3       | 0    | 4.2.13  | 4 R372 | p2/p6/p7 pool 3       | 5    |
| 4.29.13 | 1 R369 | p17 pool 1            | 0    | 4.29.13 | 2 R382 | p17 pool 1            | 0    | 4.2.13  | 3 R387 | p17 pool 1            | 0    | 4.2.13  | 4 R372 | p17 pool 1            | 15   |
| 4.29.13 | 1 R369 | p17 pool 2            | 40   | 4.29.13 | 2 R382 | p17 pool 2            | 20   | 4.2.13  | 3 R387 | p17 pool 2            | 0    | 4.2.13  | 4 R372 | p17 pool 2            | 10   |
| 4.29.13 | 1 R369 | p17 pool 3            | 0    | 4.29.13 | 2 R382 | p17 pool 3            | 0    | 4.2.13  | 3 R387 | p17 pool 3            | 0    | 4.2.13  | 4 R372 | p17 pool 3            | 10   |
| 4.29.13 | 1 R369 | pol pool 1            | 0    | 4.29.13 | 2 R382 | pol pool 1            | 0    | 4.2.13  | 3 R387 | pol pool 1            | 0    | 4.2.13  | 4 R372 | pol pool 1            | 0    |
| 4.29.13 | 1 R369 | pol pool 2            | 15   | 4.29.13 | 2 R382 | pol pool 2            | 0    | 4.2.13  | 3 R387 | pol pool 2            | 0    | 4.2.13  | 4 R372 | pol pool 2            | 35   |
| 4.29.13 | 1 R369 | pol pool 3            | 5    | 4.29.13 | 2 R382 | pol pool 3            | 25   | 4.2.13  | 3 R387 | pol pool 3            | 0    | 4.2.13  | 4 R372 | pol pool 3            | 5    |
| 4.29.13 | 1 R369 | pol pool 4            | 0    | 4.29.13 | 2 R382 | pol pool 4            | 0    | 4.2.13  | 3 R387 | pol pool 4            | 0    | 4.2.13  | 4 R372 | pol pool 4            | 5    |
| 4.29.13 | 1 R369 | nef pool 1            | 0    | 4.29.13 | 2 R382 | nef pool 1            | 0    | 4.2.13  | 3 R387 | nef pool 1            | 0    | 4.2.13  | 4 R372 | nef pool 1            | 15   |
| 4.29.13 | 1 R369 | nef pool 2            | 0    | 4.29.13 | 2 R382 | nef pool 2            | 0    | 4.2.13  | 3 R387 | nef pool 2            | 5    | 4.2.13  | 4 R372 | nef pool 2            | 10   |
| 4.29.13 | 1 R369 | nef pool 3            | 40   | 4.29.13 | 2 R382 | nef pool 3            | 20   | 4.2.13  | 3 R387 | nef pool 3            | 0    | 4.2.13  | 4 R372 | nef pool 3            | 10   |
| 4.29.13 | 1 R369 | hlgG4-HIV5sep         | 0    | 4.29.13 | 2 R382 | hlgG4-HIV5sep         | 0    | 4.2.13  | 3 R387 | hlgG4-HIV5sep         | 0    | 4.2.13  | 4 R372 | hlgG4-HIV5sep         | 10   |
| 4.29.13 | 1 R369 | hlgG4                 | 0    | 4.29.13 | 2 R382 | hlgG4                 | 0    | 4.2.13  | 3 R387 | hlgG4                 | 0    | 4.2.13  | 4 R372 | hlgG4                 | 10   |
| 4.29.13 | 1 R369 | Cohesin-nef66 (C1077) | 5    | 4.29.13 | 2 R382 | Cohesin-nef66 (C1077) | 0    | 4.2.13  | 3 R387 | Cohesin-nef66 (C1077) | 0    | 4.2.13  | 4 R372 | Cohesin-nef66 (C1077) | 10   |
| 4.29.13 | 1 R369 | Cohesin-nef66 (C1078) | 0    | 4.29.13 | 2 R382 | Cohesin-nef66 (C1078) | 0    | 4.2.13  | 3 R387 | Cohesin-nef66 (C1078) | 10   | 4.2.13  | 4 R372 | Cohesin-nef66 (C1078) | 25   |
| 4.29.13 | 1 R369 | Cohesin-gag17         | 0    | 4.29.13 | 2 R382 | Cohesin-gag17         | 0    | 4.2.13  | 3 R387 | Cohesin-gag17         | 5    | 4.2.13  | 4 R372 | Cohesin-gag17         | 30   |
| 4.29.13 | 1 R369 | Cohesin-gag253        | 5    | 4.29.13 | 2 R382 | Cohesin-gag253        | 0    | 4.2.13  | 3 R387 | Cohesin-gag253        | 5    | 4.2.13  | 4 R372 | Cohesin-gag253        | 5    |
| 4.29.13 | 1 R369 | Cohesin-pol158        | 0    | 4.29.13 | 2 R382 | Cohesin-pol158        | 5    | 4.2.13  | 3 R387 | Cohesin-pol158        | 0    | 4.2.13  | 4 R372 | Cohesin-pol158        | 5    |
| 4.29.13 | 1 R369 | Cohesin               | 5    | 4.29.13 | 2 R382 | Cohesin               | 0    | 4.2.13  | 3 R387 | Cohesin               | 0    | 4.2.13  | 4 R372 | Cohesin               | 0    |
| 4.29.13 | 1 R369 | pha                   | 2830 | 4.29.13 | 2 R382 | pha                   | 2435 | 4.2.13  | 3 R387 | pha                   | 2430 | 4.2.13  | 4 R372 | pha                   | 2590 |
| 4.29.13 | 1 R385 | Non                   | 0    | 4.29.13 | 2 R384 | Non                   | 0    | 4.2.13  | 3 R388 | Non                   | 0    | 4.2.13  | 4 R383 | Non                   | 0    |
| 4.29.13 | 1 R385 | p24 pool 1            | 10   | 4.29.13 | 2 R384 | p24 pool 1            | 0    | 4.2.13  | 3 R388 | p24 pool 1            | 0    | 4.2.13  | 4 R383 | p24 pool 1            | 5    |
| 4.29.13 | 1 R385 | p24 pool 2            | 60   | 4.29.13 | 2 R384 | p24 pool 2            | 10   | 4.2.13  | 3 R388 | p24 pool 2            | 0    | 4.2.13  | 4 R383 | p24 pool 2            | 10   |
| 4.29.13 | 1 R385 | p24 pool 3            | 10   | 4.29.13 | 2 R384 | p24 pool 3            | 0    | 4.2.13  | 3 R388 | p24 pool 3            | 5    | 4.2.13  | 4 R383 | p24 pool 3            | 25   |
| 4.29.13 | 1 R385 | p24 pool 4            | 0    | 4.29.13 | 2 R384 | p24 pool 4            | 0    | 4.2.13  | 3 R388 | p24 pool 4            | 10   | 4.2.13  | 4 R383 | p24 pool 4            | 10   |
| 4.29.13 | 1 R385 | p24 pool 5            | 0    | 4.29.13 | 2 R384 | p24 pool 5            | 0    | 4.2.13  | 3 R388 | p24 pool 5            | 0    | 4.2.13  | 4 R383 | p24 pool 5            | 5    |
| 4.29.13 | 1 R385 | p2/p6/p7 pool 1       | 15   | 4.29.13 | 2 R384 | p2/p6/p7 pool 1       | 0    | 4.2.13  | 3 R388 | p2/p6/p7 pool 1       | 0    | 4.2.13  | 4 R383 | p2/p6/p7 pool 1       | 0    |
| 4.29.13 | 1 R385 | p2/p6/p7 pool 2       | 10   | 4.29.13 | 2 R384 | p2/p6/p7 pool 2       | 0    | 4.2.13  | 3 R388 | p2/p6/p7 pool 2       | 5    | 4.2.13  | 4 R383 | p2/p6/p7 pool 2       | 0    |
| 4.29.13 | 1 R385 | p2/p6/p7 pool 3       | 0    | 4.29.13 | 2 R384 | p2/p6/p7 pool 3       | 0    | 4.2.13  | 3 R388 | p2/p6/p7 pool 3       | 0    | 4.2.13  | 4 R383 | p2/p6/p7 pool 3       | 0    |
| 4.29.13 | 1 R385 | p17 pool 1            | 0    | 4.29.13 | 2 R384 | p17 pool 1            | 0    | 4.2.13  | 3 R388 | p17 pool 1            | 0    | 4.2.13  | 4 R383 | p17 pool 1            | 15   |
| 4.29.13 | 1 R385 | p17 pool 2            | 5    | 4.29.13 | 2 R384 | p17 pool 2            | 0    | 4.2.13  | 3 R388 | p17 pool 2            | 5    | 4.2.13  | 4 R383 | p17 pool 2            | 5    |
| 4.29.13 | 1 R385 | p17 pool 3            | 5    | 4.29.13 | 2 R384 | p17 pool 3            | 0    | 4.2.13  | 3 R388 | p17 pool 3            | 0    | 4.2.13  | 4 R383 | p17 pool 3            | 5    |
| 4.29.13 | 1 R385 | pol pool 1            | 0    | 4.29.13 | 2 R384 | pol pool 1            | 0    | 4.2.13  | 3 R388 | pol pool 1            | 0    | 4.2.13  | 4 R383 | pol pool 1            | 5    |
| 4.29.13 | 1 R385 | pol pool 2            | 0    | 4.29.13 | 2 R384 | pol pool 2            | 0    | 4.2.13  | 3 R388 | pol pool 2            | 15   | 4.2.13  | 4 R383 | pol pool 2            | 55   |
| 4.29.13 | 1 R385 | pol pool 3            | 5    | 4.29.13 | 2 R384 | pol pool 3            | 0    | 4.2.13  | 3 R388 | pol pool 3            | 0    | 4.2.13  | 4 R383 | pol pool 3            | 5    |
| 4.29.13 | 1 R385 | pol pool 4            | 0    | 4.29.13 | 2 R384 | pol pool 4            | 0    | 4.2.13  | 3 R388 | pol pool 4            | 5    | 4.2.13  | 4 R383 | pol pool 4            | 5    |
| 4.29.13 | 1 R385 | nef pool 1            | 10   | 4.29.13 | 2 R384 | nef pool 1            | 0    | 4.2.13  | 3 R388 | nef pool 1            | 0    | 4.2.13  | 4 R383 | nef pool 1            | 10   |
| 4.29.13 | 1 R385 | nef pool 2            | 0    | 4.29.13 | 2 R384 | nef pool 2            | 0    | 4.2.13  | 3 R388 | nef pool 2            | 15   | 4.2.13  | 4 R383 | nef pool 2            | 30   |
| 4.29.13 | 1 R385 | nef pool 3            | 15   | 4.29.13 | 2 R384 | nef pool 3            | 0    | 4.2.13  | 3 R388 | nef pool 3            | 0    | 4.2.13  | 4 R383 | nef pool 3            | 0    |
| 4.29.13 | 1 R385 | hlgG4-HIV5sep         | 0    | 4.29.13 | 2 R384 | hlgG4-HIV5sep         | 0    | 4.2.13  | 3 R388 | hlgG4-HIV5sep         | 30   | 4.2.13  | 4 R383 | hlgG4-HIV5sep         | 5    |
| 4.29.13 | 1 R385 | hlgG4                 | 0    | 4.29.13 | 2 R384 | hlgG4                 | 0    | 4.2.13  | 3 R388 | hlgG4                 | 10   | 4.2.13  | 4 R383 | hlgG4                 | 10   |
| 4.29.13 | 1 R385 | Cohesin-nef66 (C1077) | 10   | 4.29.13 | 2 R384 | Cohesin-nef66 (C1077) | 0    | 4.2.13  | 3 R388 | Cohesin-nef66 (C1077) | 5    | 4.2.13  | 4 R383 | Cohesin-nef66 (C1077) | 15   |
| 4.29.13 | 1 R385 | Cohesin-nef66 (C1078) | 10   | 4.29.13 | 2 R384 | Cohesin-nef66 (C1078) | 0    | 4.2.13  | 3 R388 | Cohesin-nef66 (C1078) | 45   | 4.2.13  | 4 R383 | Cohesin-nef66 (C1078) | 20   |
| 4.29.13 | 1 R385 | Cohesin-gag17         | 0    | 4.29.13 | 2 R384 | Cohesin-gag17         | 0    | 4.2.13  | 3 R388 | Cohesin-gag17         | 15   | 4.2.13  | 4 R383 | Cohesin-gag17         | 25   |
| 4.29.13 | 1 R385 | Cohesin-gag253        | 20   | 4.29.13 | 2 R384 | Cohesin-gag253        | 0    | 4.2.13  | 3 R388 | Cohesin-gag253        | 0    | 4.2.13  | 4 R383 | Cohesin-gag253        | 5    |
| 4.29.13 | 1 R385 | Cohesin-pol158        | 15   | 4.29.13 | 2 R384 | Cohesin-pol158        | 0    | 4.2.13  | 3 R388 | Cohesin-pol158        | 0    | 4.2.13  | 4 R383 | Cohesin-pol158        | 5    |
| 4.29.13 | 1 R385 | Cohesin               | 0    | 4.29.13 | 2 R384 | Cohesin               | 0    | 4.2.13  | 3 R388 | Cohesin               | 0    | 4.2.13  | 4 R383 | Cohesin               | 0    |
| 4.29.13 | 1 R385 | pha                   | 2430 | 4.29.13 | 2 R384 | pha                   | 3260 | 4.2.13  | 3 R388 | pha                   | 2925 | 4.2.13  | 4 R383 | pha                   | 2590 |
| 5.13.13 | 1 R370 | Non                   | 0    | 5.13.13 | 2 R376 | Non                   | 0    | 5.28.13 | 3 R368 | Non                   | 0    | 5.28.13 | 4 R386 | Non                   | 0    |
| 5.13.13 | 1 R370 | p24 pool 1            | 0    | 5.13.13 | 2 R376 | p24 pool 1            | 80   | 5.28.13 | 3 R368 | p24 pool 1            | 5    | 5.28.13 | 4 R386 | p24 pool 1            | 0    |
| 5.13.13 | 1 R370 | p24 pool 2            | 5    | 5.13.13 | 2 R376 | p24 pool 2            | 5    | 5.28.13 | 3 R368 | p24 pool 2            | 0    | 5.28.13 | 4 R386 | p24 pool 2            | 10   |
| 5.13.13 | 1 R370 | p24 pool 3            | 0    | 5.13.13 | 2 R376 | p24 pool 3            | 0    | 5.28.13 | 3 R368 | p24 pool 3            | 0    | 5.28.13 | 4 R386 | p24 pool 3            | 40   |
| 5.13.13 | 1 R370 | p24 pool 4            | 5    | 5.13.13 | 2 R376 | p24 pool 4            | 0    | 5.28.13 | 3 R368 | p24 pool 4            | 0    | 5.28.13 | 4 R386 | p24 pool 4            | 20   |
| 5.13.13 | 1 R370 | p24 pool 5            | 0    | 5.13.13 | 2 R376 | p24 pool 5            | 0    | 5.28.13 | 3 R368 | p24 pool 5            | 0    | 5.28.13 | 4 R386 | p24 pool 5            | 0    |
| 5.13.13 | 1 R370 | p2/p6/p7 pool 1       | 5    | 5.13.13 | 2 R376 | p2/p6/p7 pool 1       | 5    | 5.28.13 | 3 R368 | p2/p6/p7 pool 1       | 0    | 5.28.13 | 4 R386 | p2/p6/p7 pool 1       | 5    |
| 5.13.13 | 1 R370 | p2/p6/p7 pool 2       | 5    | 5.13.13 | 2 R376 | p2/p6/p7 pool 2       | 0    | 5.28.13 | 3 R368 | p2/p6/p7 pool 2       | 0    | 5.28.13 | 4 R386 | p2/p6/p7 pool 2       | 5    |
| 5.13.13 | 1 R370 | p2/p6/p7 pool 3       | 0    | 5.13.13 | 2 R376 | p2/p6/p7 pool 3       | 5    | 5.28.13 | 3 R368 | p2/p6/p7 pool 3       | 0    | 5.28.13 | 4 R386 | p2/p6/p7 pool 3       | 5    |
| 5.13.13 | 1 R370 | p17 pool 1            | 5    | 5.13.13 | 2 R376 | p17 pool 1            | 0    | 5.28.13 | 3 R368 | p17 pool 1            | 0    | 5.28.13 | 4 R386 | p17 pool 1            | 5    |
| 5.13.13 | 1 R370 |                       |      |         |        |                       |      |         |        |                       |      |         |        |                       |      |

|         |        |                       |      |         |        |                       |      |         |        |                       |      |         |        |                       |      |
|---------|--------|-----------------------|------|---------|--------|-----------------------|------|---------|--------|-----------------------|------|---------|--------|-----------------------|------|
| 5.13.13 | 1 R370 | hlgG4                 | 0    | 5.13.13 | 2 R376 | hlgG4                 | 0    | 5.28.13 | 3 R368 | hlgG4                 | 0    | 5.28.13 | 4 R386 | hlgG4                 | 0    |
| 5.13.13 | 1 R370 | Cohesin-nef66 (C1077) | 0    | 5.13.13 | 2 R376 | Cohesin-nef66 (C1077) | 5    | 5.28.13 | 3 R368 | Cohesin-nef66 (C1077) | 10   | 5.28.13 | 4 R386 | Cohesin-nef66 (C1077) | 0    |
| 5.13.13 | 1 R370 | Cohesin-nef66 (C1078) | 5    | 5.13.13 | 2 R376 | Cohesin-nef66 (C1078) | 0    | 5.28.13 | 3 R368 | Cohesin-nef66 (C1078) | 0    | 5.28.13 | 4 R386 | Cohesin-nef66 (C1078) | 0    |
| 5.13.13 | 1 R370 | Cohesin-gag17         | 5    | 5.13.13 | 2 R376 | Cohesin-gag17         | 5    | 5.28.13 | 3 R368 | Cohesin-gag17         | 0    | 5.28.13 | 4 R386 | Cohesin-gag17         | 5    |
| 5.13.13 | 1 R370 | Cohesin-gag253        | 5    | 5.13.13 | 2 R376 | Cohesin-gag253        | 10   | 5.28.13 | 3 R368 | Cohesin-gag253        | 5    | 5.28.13 | 4 R386 | Cohesin-gag253        | 5    |
| 5.13.13 | 1 R370 | Cohesin-pol158        | 15   | 5.13.13 | 2 R376 | Cohesin-pol158        | 5    | 5.28.13 | 3 R368 | Cohesin-pol158        | 35   | 5.28.13 | 4 R386 | Cohesin-pol158        | 10   |
| 5.13.13 | 1 R370 | Cohesin               | 0    | 5.13.13 | 2 R376 | Cohesin               | 0    | 5.28.13 | 3 R368 | Cohesin               | 0    | 5.28.13 | 4 R386 | Cohesin               | 0    |
| 5.13.13 | 1 R370 | pha                   | 2455 | 5.13.13 | 2 R376 | pha                   | 2670 | 5.28.13 | 3 R368 | pha                   | 2815 | 5.28.13 | 4 R386 | pha                   | 3605 |
| 5.13.13 | 1 R371 | Non                   | 0    | 5.13.13 | 2 R377 | Non                   | 0    | 5.28.13 | 3 R375 | Non                   | 0    | 5.28.13 | 4 R389 | Non                   | 0    |
| 5.13.13 | 1 R371 | p24 pool 1            | 45   | 5.13.13 | 2 R377 | p24 pool 1            | 0    | 5.28.13 | 3 R375 | p24 pool 1            | 5    | 5.28.13 | 4 R389 | p24 pool 1            | 25   |
| 5.13.13 | 1 R371 | p24 pool 2            | 40   | 5.13.13 | 2 R377 | p24 pool 2            | 5    | 5.28.13 | 3 R375 | p24 pool 2            | 0    | 5.28.13 | 4 R389 | p24 pool 2            | 0    |
| 5.13.13 | 1 R371 | p24 pool 3            | 0    | 5.13.13 | 2 R377 | p24 pool 3            | 0    | 5.28.13 | 3 R375 | p24 pool 3            | 10   | 5.28.13 | 4 R389 | p24 pool 3            | 110  |
| 5.13.13 | 1 R371 | p24 pool 4            | 0    | 5.13.13 | 2 R377 | p24 pool 4            | 0    | 5.28.13 | 3 R375 | p24 pool 4            | 10   | 5.28.13 | 4 R389 | p24 pool 4            | 20   |
| 5.13.13 | 1 R371 | p24 pool 5            | 0    | 5.13.13 | 2 R377 | p24 pool 5            | 5    | 5.28.13 | 3 R375 | p24 pool 5            | 0    | 5.28.13 | 4 R389 | p24 pool 5            | 15   |
| 5.13.13 | 1 R371 | p2/p6/p7 pool 1       | 5    | 5.13.13 | 2 R377 | p2/p6/p7 pool 1       | 10   | 5.28.13 | 3 R375 | p2/p6/p7 pool 1       | 0    | 5.28.13 | 4 R389 | p2/p6/p7 pool 1       | 5    |
| 5.13.13 | 1 R371 | p2/p6/p7 pool 2       | 5    | 5.13.13 | 2 R377 | p2/p6/p7 pool 2       | 0    | 5.28.13 | 3 R375 | p2/p6/p7 pool 2       | 10   | 5.28.13 | 4 R389 | p2/p6/p7 pool 2       | 0    |
| 5.13.13 | 1 R371 | p2/p6/p7 pool 3       | 0    | 5.13.13 | 2 R377 | p2/p6/p7 pool 3       | 0    | 5.28.13 | 3 R375 | p2/p6/p7 pool 3       | 5    | 5.28.13 | 4 R389 | p2/p6/p7 pool 3       | 0    |
| 5.13.13 | 1 R371 | p17 pool 1            | 0    | 5.13.13 | 2 R377 | p17 pool 1            | 0    | 5.28.13 | 3 R375 | p17 pool 1            | 10   | 5.28.13 | 4 R389 | p17 pool 1            | 10   |
| 5.13.13 | 1 R371 | p17 pool 2            | 0    | 5.13.13 | 2 R377 | p17 pool 2            | 0    | 5.28.13 | 3 R375 | p17 pool 2            | 5    | 5.28.13 | 4 R389 | p17 pool 2            | 0    |
| 5.13.13 | 1 R371 | p17 pool 3            | 0    | 5.13.13 | 2 R377 | p17 pool 3            | 0    | 5.28.13 | 3 R375 | p17 pool 3            | 5    | 5.28.13 | 4 R389 | p17 pool 3            | 0    |
| 5.13.13 | 1 R371 | pol pool 1            | 0    | 5.13.13 | 2 R377 | pol pool 1            | 0    | 5.28.13 | 3 R375 | pol pool 1            | 0    | 5.28.13 | 4 R389 | pol pool 1            | 0    |
| 5.13.13 | 1 R371 | pol pool 2            | 0    | 5.13.13 | 2 R377 | pol pool 2            | 10   | 5.28.13 | 3 R375 | pol pool 2            | 260  | 5.28.13 | 4 R389 | pol pool 2            | 460  |
| 5.13.13 | 1 R371 | pol pool 3            | 5    | 5.13.13 | 2 R377 | pol pool 3            | 0    | 5.28.13 | 3 R375 | pol pool 3            | 15   | 5.28.13 | 4 R389 | pol pool 3            | 25   |
| 5.13.13 | 1 R371 | pol pool 4            | 5    | 5.13.13 | 2 R377 | pol pool 4            | 0    | 5.28.13 | 3 R375 | pol pool 4            | 10   | 5.28.13 | 4 R389 | pol pool 4            | 0    |
| 5.13.13 | 1 R371 | nef pool 1            | 5    | 5.13.13 | 2 R377 | nef pool 1            | 0    | 5.28.13 | 3 R375 | nef pool 1            | 0    | 5.28.13 | 4 R389 | nef pool 1            | 0    |
| 5.13.13 | 1 R371 | nef pool 2            | 0    | 5.13.13 | 2 R377 | nef pool 2            | 0    | 5.28.13 | 3 R375 | nef pool 2            | 105  | 5.28.13 | 4 R389 | nef pool 2            | 30   |
| 5.13.13 | 1 R371 | nef pool 3            | 20   | 5.13.13 | 2 R377 | nef pool 3            | 0    | 5.28.13 | 3 R375 | nef pool 3            | 15   | 5.28.13 | 4 R389 | nef pool 3            | 10   |
| 5.13.13 | 1 R371 | hlgG4-HIV5sep         | 0    | 5.13.13 | 2 R377 | hlgG4-HIV5sep         | 0    | 5.28.13 | 3 R375 | hlgG4-HIV5sep         | 0    | 5.28.13 | 4 R389 | hlgG4-HIV5sep         | 0    |
| 5.13.13 | 1 R371 | hlgG4                 | 0    | 5.13.13 | 2 R377 | hlgG4                 | 0    | 5.28.13 | 3 R375 | hlgG4                 | 0    | 5.28.13 | 4 R389 | hlgG4                 | 0    |
| 5.13.13 | 1 R371 | Cohesin-nef66 (C1077) | 0    | 5.13.13 | 2 R377 | Cohesin-nef66 (C1077) | 10   | 5.28.13 | 3 R375 | Cohesin-nef66 (C1077) | 20   | 5.28.13 | 4 R389 | Cohesin-nef66 (C1077) | 0    |
| 5.13.13 | 1 R371 | Cohesin-nef66 (C1078) | 0    | 5.13.13 | 2 R377 | Cohesin-nef66 (C1078) | 0    | 5.28.13 | 3 R375 | Cohesin-nef66 (C1078) | 0    | 5.28.13 | 4 R389 | Cohesin-nef66 (C1078) | 5    |
| 5.13.13 | 1 R371 | Cohesin-gag17         | 0    | 5.13.13 | 2 R377 | Cohesin-gag17         | 0    | 5.28.13 | 3 R375 | Cohesin-gag17         | 5    | 5.28.13 | 4 R389 | Cohesin-gag17         | 0    |
| 5.13.13 | 1 R371 | Cohesin-gag253        | 10   | 5.13.13 | 2 R377 | Cohesin-gag253        | 10   | 5.28.13 | 3 R375 | Cohesin-gag253        | 5    | 5.28.13 | 4 R389 | Cohesin-gag253        | 10   |
| 5.13.13 | 1 R371 | Cohesin-pol158        | 45   | 5.13.13 | 2 R377 | Cohesin-pol158        | 5    | 5.28.13 | 3 R375 | Cohesin-pol158        | 265  | 5.28.13 | 4 R389 | Cohesin-pol158        | 360  |
| 5.13.13 | 1 R371 | Cohesin               | 0    | 5.13.13 | 2 R377 | Cohesin               | 0    | 5.28.13 | 3 R375 | Cohesin               | 0    | 5.28.13 | 4 R389 | Cohesin               | 0    |
| 5.13.13 | 1 R371 | pha                   | 3245 | 5.13.13 | 2 R377 | pha                   | 2480 | 5.28.13 | 3 R375 | pha                   | 2685 | 5.28.13 | 4 R389 | pha                   | 2800 |
| 5.13.13 | 1 R373 | Non                   | 0    | 5.13.13 | 2 R378 | Non                   | 0    | 5.28.13 | 3 R379 | Non                   | 0    | 5.28.13 | 4 R390 | Non                   | 0    |
| 5.13.13 | 1 R373 | p24 pool 1            | 45   | 5.13.13 | 2 R378 | p24 pool 1            | 0    | 5.28.13 | 3 R379 | p24 pool 1            | 0    | 5.28.13 | 4 R390 | p24 pool 1            | 0    |
| 5.13.13 | 1 R373 | p24 pool 2            | 40   | 5.13.13 | 2 R378 | p24 pool 2            | 0    | 5.28.13 | 3 R379 | p24 pool 2            | 0    | 5.28.13 | 4 R390 | p24 pool 2            | 10   |
| 5.13.13 | 1 R373 | p24 pool 3            | 0    | 5.13.13 | 2 R378 | p24 pool 3            | 0    | 5.28.13 | 3 R379 | p24 pool 3            | 40   | 5.28.13 | 4 R390 | p24 pool 3            | 25   |
| 5.13.13 | 1 R373 | p24 pool 4            | 0    | 5.13.13 | 2 R378 | p24 pool 4            | 0    | 5.28.13 | 3 R379 | p24 pool 4            | 25   | 5.28.13 | 4 R390 | p24 pool 4            | 0    |
| 5.13.13 | 1 R373 | p24 pool 5            | 0    | 5.13.13 | 2 R378 | p24 pool 5            | 0    | 5.28.13 | 3 R379 | p24 pool 5            | 5    | 5.28.13 | 4 R390 | p24 pool 5            | 0    |
| 5.13.13 | 1 R373 | p2/p6/p7 pool 1       | 5    | 5.13.13 | 2 R378 | p2/p6/p7 pool 1       | 0    | 5.28.13 | 3 R379 | p2/p6/p7 pool 1       | 0    | 5.28.13 | 4 R390 | p2/p6/p7 pool 1       | 0    |
| 5.13.13 | 1 R373 | p2/p6/p7 pool 2       | 0    | 5.13.13 | 2 R378 | p2/p6/p7 pool 2       | 0    | 5.28.13 | 3 R379 | p2/p6/p7 pool 2       | 0    | 5.28.13 | 4 R390 | p2/p6/p7 pool 2       | 0    |
| 5.13.13 | 1 R373 | p2/p6/p7 pool 3       | 0    | 5.13.13 | 2 R378 | p2/p6/p7 pool 3       | 0    | 5.28.13 | 3 R379 | p2/p6/p7 pool 3       | 0    | 5.28.13 | 4 R390 | p2/p6/p7 pool 3       | 0    |
| 5.13.13 | 1 R373 | p17 pool 1            | 0    | 5.13.13 | 2 R378 | p17 pool 1            | 0    | 5.28.13 | 3 R379 | p17 pool 1            | 10   | 5.28.13 | 4 R390 | p17 pool 1            | 0    |
| 5.13.13 | 1 R373 | p17 pool 2            | 0    | 5.13.13 | 2 R378 | p17 pool 2            | 0    | 5.28.13 | 3 R379 | p17 pool 2            | 0    | 5.28.13 | 4 R390 | p17 pool 2            | 0    |
| 5.13.13 | 1 R373 | p17 pool 3            | 0    | 5.13.13 | 2 R378 | p17 pool 3            | 0    | 5.28.13 | 3 R379 | p17 pool 3            | 0    | 5.28.13 | 4 R390 | p17 pool 3            | 0    |
| 5.13.13 | 1 R373 | pol pool 1            | 0    | 5.13.13 | 2 R378 | pol pool 1            | 0    | 5.28.13 | 3 R379 | pol pool 1            | 0    | 5.28.13 | 4 R390 | pol pool 1            | 0    |
| 5.13.13 | 1 R373 | pol pool 2            | 0    | 5.13.13 | 2 R378 | pol pool 2            | 0    | 5.28.13 | 3 R379 | pol pool 2            | 495  | 5.28.13 | 4 R390 | pol pool 2            | 55   |
| 5.13.13 | 1 R373 | pol pool 3            | 5    | 5.13.13 | 2 R378 | pol pool 3            | 0    | 5.28.13 | 3 R379 | pol pool 3            | 0    | 5.28.13 | 4 R390 | pol pool 3            | 0    |
| 5.13.13 | 1 R373 | pol pool 4            | 0    | 5.13.13 | 2 R378 | pol pool 4            | 0    | 5.28.13 | 3 R379 | pol pool 4            | 0    | 5.28.13 | 4 R390 | pol pool 4            | 0    |
| 5.13.13 | 1 R373 | nef pool 1            | 0    | 5.13.13 | 2 R378 | nef pool 1            | 0    | 5.28.13 | 3 R379 | nef pool 1            | 0    | 5.28.13 | 4 R390 | nef pool 1            | 0    |
| 5.13.13 | 1 R373 | nef pool 2            | 0    | 5.13.13 | 2 R378 | nef pool 2            | 0    | 5.28.13 | 3 R379 | nef pool 2            | 20   | 5.28.13 | 4 R390 | nef pool 2            | 5    |
| 5.13.13 | 1 R373 | nef pool 3            | 20   | 5.13.13 | 2 R378 | nef pool 3            | 0    | 5.28.13 | 3 R379 | nef pool 3            | 5    | 5.28.13 | 4 R390 | nef pool 3            | 0    |
| 5.13.13 | 1 R373 | hlgG4-HIV5sep         | 0    | 5.13.13 | 2 R378 | hlgG4-HIV5sep         | 0    | 5.28.13 | 3 R379 | hlgG4-HIV5sep         | 0    | 5.28.13 | 4 R390 | hlgG4-HIV5sep         | 0    |
| 5.13.13 | 1 R373 | hlgG4                 | 0    | 5.13.13 | 2 R378 | hlgG4                 | 0    | 5.28.13 | 3 R379 | hlgG4                 | 0    | 5.28.13 | 4 R390 | hlgG4                 | 0    |
| 5.13.13 | 1 R373 | Cohesin-nef66 (C1077) | 0    | 5.13.13 | 2 R378 | Cohesin-nef66 (C1077) | 0    | 5.28.13 | 3 R379 | Cohesin-nef66 (C1077) | 0    | 5.28.13 | 4 R390 | Cohesin-nef66 (C1077) | 0    |
| 5.13.13 | 1 R373 | Cohesin-nef66 (C1078) | 0    | 5.13.13 | 2 R378 | Cohesin-nef66 (C1078) | 0    | 5.28.13 | 3 R379 | Cohesin-nef66 (C1078) | 0    | 5.28.13 | 4 R390 | Cohesin-nef66 (C1078) | 0    |
| 5.13.13 | 1 R373 | Cohesin-gag17         | 0    | 5.13.13 | 2 R378 | Cohesin-gag17         | 0    | 5.28.13 | 3 R379 | Cohesin-gag17         | 0    | 5.28.13 | 4 R390 | Cohesin-gag17         | 0    |
| 5.13.13 | 1 R373 | Cohesin-gag253        | 10   | 5.13.13 | 2 R378 | Cohesin-gag253        | 35   | 5.28.13 | 3 R379 | Cohesin-gag253        | 5    | 5.28.13 | 4 R390 | Cohesin-gag253        | 0    |
| 5.13.13 | 1 R373 | Cohesin-pol158        | 45   | 5.13.13 | 2 R378 | Cohesin-pol158        | 60   | 5.28.13 | 3 R379 | Cohesin-pol158        | 250  | 5.28.13 | 4 R390 | Cohesin-pol158        | 20   |
| 5.13.13 | 1 R373 | Cohesin               | 0    | 5.13.13 | 2 R378 | Cohesin               | 0    | 5.28.13 | 3 R379 | Cohesin               | 0    | 5.28.13 | 4 R390 | Cohesin               | 0    |
| 5.13.13 | 1 R373 | pha                   | 3245 | 5.13.13 | 2 R378 | pha                   | 3090 | 5.28.13 | 3 R379 | pha                   | 2485 | 5.28.13 | 4 R390 | pha                   | 2700 |
| 5.13.13 | 1 R374 | Non                   | 0    | 5.13.13 | 2 R380 | Non                   | 0    | 5.28.13 | 3 R381 | Non                   | 0    | 5.28.13 | 4 R391 | Non                   | 0    |
| 5.13.13 | 1 R374 | p24 pool 1            | 0    | 5.13.13 | 2 R380 | p24 pool 1            | 80   | 5.28.13 | 3 R381 | p24 pool 1            | 0    | 5.28.13 | 4 R391 | p24 pool 1            | 5    |
| 5.13.13 | 1 R374 | p24 pool 2            | 25   | 5.13.13 | 2 R380 | p24 pool 2            | 5    | 5.28.13 | 3 R381 | p24 pool 2            | 0    | 5.28.13 | 4 R391 | p24 pool 2            | 15   |
| 5.13.13 | 1 R374 | p24 pool 3            | 0    | 5.13.13 | 2 R380 | p24 pool 3            | 0    | 5.28.13 | 3 R381 | p24 pool 3            | 0    | 5.28.13 | 4 R391 | p24 pool 3            | 30   |
| 5.13.13 | 1 R374 | p24 pool 4            | 0    | 5.13.13 | 2 R380 | p24 pool 4            | 0    | 5.28.13 | 3 R381 | p24 pool 4            | 5    | 5.28.13 | 4 R391 | p24 pool 4            | 5    |
| 5.13.13 | 1 R374 | p24 pool 5            | 0    | 5.13.13 | 2 R380 | p24 pool 5            | 0    | 5.28.13 | 3 R381 | p24 pool 5            | 0    | 5.28.13 | 4 R391 | p24 pool 5            | 10   |
| 5.13.13 | 1 R374 | p2/p6/p7 pool 1       | 0    | 5.13.13 | 2 R380 | p2/p6/p7 pool 1       | 5    | 5.28.13 | 3 R381 | p2/p6/p7 pool 1       | 0    | 5.28.13 | 4 R391 | p2/p6/p7 pool 1       | 5    |
| 5.13.13 | 1 R374 | p2/p6/p7 pool 2       | 5    | 5.13.13 | 2 R380 | p2/p6/p7 pool 2       | 0    | 5.28.13 | 3 R381 | p2/p6/p7 pool 2       | 0    | 5.28.13 | 4 R391 | p2/p6/p7 pool 2       | 5    |
| 5.13.13 | 1 R374 | p2/p6/p7 pool 3       | 0    | 5.13.13 | 2 R380 | p2/p6/p7 pool 3       | 5    | 5.28.13 | 3 R381 | p2/p6/p7 pool 3       | 0    | 5.28.13 | 4 R391 | p2/p6/p7 pool 3       | 0    |
| 5.13.13 | 1 R374 | p17 pool 1            | 20   | 5.13.13 | 2 R380 | p17 pool 1            | 0    | 5.28.13 | 3 R381 | p17 pool 1            | 0    | 5.28.13 | 4 R391 | p17 pool 1            | 25   |
| 5.13.13 | 1 R374 | p17 pool 2            | 25   | 5.13.13 | 2 R380 | p17 pool 2            | 0    | 5.28.13 | 3 R381 | p17 pool 2            | 0    | 5.28.13 | 4 R391 | p17 pool 2            | 20   |
| 5.13.13 | 1 R374 | p17 pool 3            | 0    | 5.13.13 | 2 R380 | p17 pool 3            | 0    | 5.28.13 | 3 R381 | p17 pool 3            | 0    | 5.28.13 | 4 R391 | p17 pool 3            | 10   |
| 5.13.13 | 1 R374 | pol pool 1            | 0    | 5.13.13 | 2 R380 |                       |      |         |        |                       |      |         |        |                       |      |

|         |        |                       |      |         |        |                       |      |         |        |                       |      |         |        |                       |      |
|---------|--------|-----------------------|------|---------|--------|-----------------------|------|---------|--------|-----------------------|------|---------|--------|-----------------------|------|
| 5.13.13 | 1 R374 | Cohesin-gag253        | 35   | 5.13.13 | 2 R380 | Cohesin-gag253        | 10   | 5.28.13 | 3 R381 | Cohesin-gag253        | 0    | 5.28.13 | 4 R391 | Cohesin-gag253        | 10   |
| 5.13.13 | 1 R374 | Cohesin-pol158        | 60   | 5.13.13 | 2 R380 | Cohesin-pol158        | 5    | 5.28.13 | 3 R381 | Cohesin-pol158        | 100  | 5.28.13 | 4 R391 | Cohesin-pol158        | 40   |
| 5.13.13 | 1 R374 | Cohesin               | 0    | 5.13.13 | 2 R380 | Cohesin               | 0    | 5.28.13 | 3 R381 | Cohesin               | 0    | 5.28.13 | 4 R391 | Cohesin               | 20   |
| 5.13.13 | 1 R374 | pha                   | 3090 | 5.13.13 | 2 R380 | pha                   | 2670 | 5.28.13 | 3 R381 | pha                   | 2875 | 5.28.13 | 4 R391 | pha                   | 3040 |
| 5.13.13 | 1 R369 | Non                   | 0    | 5.13.13 | 2 R382 | Non                   | 0    | 5.28.13 | 3 R382 | Non                   | 0    | 5.28.13 | 4 R372 | Non                   | 0    |
| 5.13.13 | 1 R369 | p24 pool 1            | 0    | 5.13.13 | 2 R382 | p24 pool 1            | 5    | 5.28.13 | 3 R382 | p24 pool 1            | 0    | 5.28.13 | 4 R372 | p24 pool 1            | 0    |
| 5.13.13 | 1 R369 | p24 pool 2            | 5    | 5.13.13 | 2 R382 | p24 pool 2            | 15   | 5.28.13 | 3 R382 | p24 pool 2            | 0    | 5.28.13 | 4 R372 | p24 pool 2            | 5    |
| 5.13.13 | 1 R369 | p24 pool 3            | 0    | 5.13.13 | 2 R382 | p24 pool 3            | 5    | 5.28.13 | 3 R382 | p24 pool 3            | 0    | 5.28.13 | 4 R372 | p24 pool 3            | 20   |
| 5.13.13 | 1 R369 | p24 pool 4            | 5    | 5.13.13 | 2 R382 | p24 pool 4            | 0    | 5.28.13 | 3 R382 | p24 pool 4            | 0    | 5.28.13 | 4 R372 | p24 pool 4            | 10   |
| 5.13.13 | 1 R369 | p24 pool 5            | 0    | 5.13.13 | 2 R382 | p24 pool 5            | 0    | 5.28.13 | 3 R382 | p24 pool 5            | 0    | 5.28.13 | 4 R372 | p24 pool 5            | 0    |
| 5.13.13 | 1 R369 | p2/p6/p7 pool 1       | 0    | 5.13.13 | 2 R382 | p2/p6/p7 pool 1       | 0    | 5.28.13 | 3 R382 | p2/p6/p7 pool 1       | 0    | 5.28.13 | 4 R372 | p2/p6/p7 pool 1       | 0    |
| 5.13.13 | 1 R369 | p2/p6/p7 pool 2       | 0    | 5.13.13 | 2 R382 | p2/p6/p7 pool 2       | 5    | 5.28.13 | 3 R382 | p2/p6/p7 pool 2       | 0    | 5.28.13 | 4 R372 | p2/p6/p7 pool 2       | 0    |
| 5.13.13 | 1 R369 | p2/p6/p7 pool 3       | 0    | 5.13.13 | 2 R382 | p2/p6/p7 pool 3       | 10   | 5.28.13 | 3 R382 | p2/p6/p7 pool 3       | 0    | 5.28.13 | 4 R372 | p2/p6/p7 pool 3       | 0    |
| 5.13.13 | 1 R369 | p17 pool 1            | 0    | 5.13.13 | 2 R382 | p17 pool 1            | 5    | 5.28.13 | 3 R382 | p17 pool 1            | 0    | 5.28.13 | 4 R372 | p17 pool 1            | 10   |
| 5.13.13 | 1 R369 | p17 pool 2            | 5    | 5.13.13 | 2 R382 | p17 pool 2            | 10   | 5.28.13 | 3 R382 | p17 pool 2            | 0    | 5.28.13 | 4 R372 | p17 pool 2            | 0    |
| 5.13.13 | 1 R369 | p17 pool 3            | 0    | 5.13.13 | 2 R382 | p17 pool 3            | 5    | 5.28.13 | 3 R382 | p17 pool 3            | 0    | 5.28.13 | 4 R372 | p17 pool 3            | 0    |
| 5.13.13 | 1 R369 | pol pool 1            | 0    | 5.13.13 | 2 R382 | pol pool 1            | 5    | 5.28.13 | 3 R382 | pol pool 1            | 0    | 5.28.13 | 4 R372 | pol pool 1            | 0    |
| 5.13.13 | 1 R369 | pol pool 2            | 0    | 5.13.13 | 2 R382 | pol pool 2            | 10   | 5.28.13 | 3 R382 | pol pool 2            | 0    | 5.28.13 | 4 R372 | pol pool 2            | 105  |
| 5.13.13 | 1 R369 | pol pool 3            | 0    | 5.13.13 | 2 R382 | pol pool 3            | 80   | 5.28.13 | 3 R382 | pol pool 3            | 0    | 5.28.13 | 4 R372 | pol pool 3            | 0    |
| 5.13.13 | 1 R369 | pol pool 4            | 5    | 5.13.13 | 2 R382 | pol pool 4            | 0    | 5.28.13 | 3 R382 | pol pool 4            | 0    | 5.28.13 | 4 R372 | pol pool 4            | 0    |
| 5.13.13 | 1 R369 | nef pool 1            | 0    | 5.13.13 | 2 R382 | nef pool 1            | 5    | 5.28.13 | 3 R382 | nef pool 1            | 0    | 5.28.13 | 4 R372 | nef pool 1            | 0    |
| 5.13.13 | 1 R369 | nef pool 2            | 0    | 5.13.13 | 2 R382 | nef pool 2            | 10   | 5.28.13 | 3 R382 | nef pool 2            | 0    | 5.28.13 | 4 R372 | nef pool 2            | 5    |
| 5.13.13 | 1 R369 | nef pool 3            | 5    | 5.13.13 | 2 R382 | nef pool 3            | 25   | 5.28.13 | 3 R382 | nef pool 3            | 0    | 5.28.13 | 4 R372 | nef pool 3            | 0    |
| 5.13.13 | 1 R369 | hlgG4-HIV5sep         | 0    | 5.13.13 | 2 R382 | hlgG4-HIV5sep         | 0    | 5.28.13 | 3 R382 | hlgG4-HIV5sep         | 0    | 5.28.13 | 4 R372 | hlgG4-HIV5sep         | 0    |
| 5.13.13 | 1 R369 | hlgG4                 | 0    | 5.13.13 | 2 R382 | hlgG4                 | 0    | 5.28.13 | 3 R382 | hlgG4                 | 0    | 5.28.13 | 4 R372 | hlgG4                 | 0    |
| 5.13.13 | 1 R369 | Cohesin-nef66 (C1077) | 0    | 5.13.13 | 2 R382 | Cohesin-nef66 (C1077) | 25   | 5.28.13 | 3 R382 | Cohesin-nef66 (C1077) | 0    | 5.28.13 | 4 R372 | Cohesin-nef66 (C1077) | 0    |
| 5.13.13 | 1 R369 | Cohesin-nef66 (C1078) | 0    | 5.13.13 | 2 R382 | Cohesin-nef66 (C1078) | 10   | 5.28.13 | 3 R382 | Cohesin-nef66 (C1078) | 0    | 5.28.13 | 4 R372 | Cohesin-nef66 (C1078) | 0    |
| 5.13.13 | 1 R369 | Cohesin-gag17         | 0    | 5.13.13 | 2 R382 | Cohesin-gag17         | 5    | 5.28.13 | 3 R382 | Cohesin-gag17         | 0    | 5.28.13 | 4 R372 | Cohesin-gag17         | 0    |
| 5.13.13 | 1 R369 | Cohesin-gag253        | 0    | 5.13.13 | 2 R382 | Cohesin-gag253        | 25   | 5.28.13 | 3 R382 | Cohesin-gag253        | 0    | 5.28.13 | 4 R372 | Cohesin-gag253        | 20   |
| 5.13.13 | 1 R369 | Cohesin-pol158        | 0    | 5.13.13 | 2 R382 | Cohesin-pol158        | 35   | 5.28.13 | 3 R382 | Cohesin-pol158        | 0    | 5.28.13 | 4 R372 | Cohesin-pol158        | 30   |
| 5.13.13 | 1 R369 | Cohesin               | 0    | 5.13.13 | 2 R382 | Cohesin               | 5    | 5.28.13 | 3 R382 | Cohesin               | 0    | 5.28.13 | 4 R372 | Cohesin               | 0    |
| 5.13.13 | 1 R369 | pha                   | 2455 | 5.13.13 | 2 R382 | pha                   | 2920 | 5.28.13 | 3 R382 | pha                   | 0    | 5.28.13 | 4 R372 | pha                   | 2400 |
| 5.13.13 | 1 R385 | Non                   | 0    | 5.13.13 | 2 R384 | Non                   | 0    | 5.28.13 | 3 R388 | Non                   | 0    | 5.28.13 | 4 R383 | Non                   | 0    |
| 5.13.13 | 1 R385 | p24 pool 1            | 0    | 5.13.13 | 2 R384 | p24 pool 1            | 5    | 5.28.13 | 3 R388 | p24 pool 1            | 0    | 5.28.13 | 4 R383 | p24 pool 1            | 0    |
| 5.13.13 | 1 R385 | p24 pool 2            | 5    | 5.13.13 | 2 R384 | p24 pool 2            | 15   | 5.28.13 | 3 R388 | p24 pool 2            | 0    | 5.28.13 | 4 R383 | p24 pool 2            | 0    |
| 5.13.13 | 1 R385 | p24 pool 3            | 0    | 5.13.13 | 2 R384 | p24 pool 3            | 0    | 5.28.13 | 3 R388 | p24 pool 3            | 0    | 5.28.13 | 4 R383 | p24 pool 3            | 90   |
| 5.13.13 | 1 R385 | p24 pool 4            | 0    | 5.13.13 | 2 R384 | p24 pool 4            | 0    | 5.28.13 | 3 R388 | p24 pool 4            | 10   | 5.28.13 | 4 R383 | p24 pool 4            | 15   |
| 5.13.13 | 1 R385 | p24 pool 5            | 5    | 5.13.13 | 2 R384 | p24 pool 5            | 5    | 5.28.13 | 3 R388 | p24 pool 5            | 5    | 5.28.13 | 4 R383 | p24 pool 5            | 5    |
| 5.13.13 | 1 R385 | p2/p6/p7 pool 1       | 10   | 5.13.13 | 2 R384 | p2/p6/p7 pool 1       | 0    | 5.28.13 | 3 R388 | p2/p6/p7 pool 1       | 0    | 5.28.13 | 4 R383 | p2/p6/p7 pool 1       | 0    |
| 5.13.13 | 1 R385 | p2/p6/p7 pool 2       | 0    | 5.13.13 | 2 R384 | p2/p6/p7 pool 2       | 5    | 5.28.13 | 3 R388 | p2/p6/p7 pool 2       | 0    | 5.28.13 | 4 R383 | p2/p6/p7 pool 2       | 0    |
| 5.13.13 | 1 R385 | p2/p6/p7 pool 3       | 0    | 5.13.13 | 2 R384 | p2/p6/p7 pool 3       | 0    | 5.28.13 | 3 R388 | p2/p6/p7 pool 3       | 0    | 5.28.13 | 4 R383 | p2/p6/p7 pool 3       | 0    |
| 5.13.13 | 1 R385 | p17 pool 1            | 0    | 5.13.13 | 2 R384 | p17 pool 1            | 5    | 5.28.13 | 3 R388 | p17 pool 1            | 0    | 5.28.13 | 4 R383 | p17 pool 1            | 25   |
| 5.13.13 | 1 R385 | p17 pool 2            | 0    | 5.13.13 | 2 R384 | p17 pool 2            | 10   | 5.28.13 | 3 R388 | p17 pool 2            | 0    | 5.28.13 | 4 R383 | p17 pool 2            | 0    |
| 5.13.13 | 1 R385 | p17 pool 3            | 0    | 5.13.13 | 2 R384 | p17 pool 3            | 0    | 5.28.13 | 3 R388 | p17 pool 3            | 0    | 5.28.13 | 4 R383 | p17 pool 3            | 0    |
| 5.13.13 | 1 R385 | pol pool 1            | 0    | 5.13.13 | 2 R384 | pol pool 1            | 5    | 5.28.13 | 3 R388 | pol pool 1            | 0    | 5.28.13 | 4 R383 | pol pool 1            | 0    |
| 5.13.13 | 1 R385 | pol pool 2            | 10   | 5.13.13 | 2 R384 | pol pool 2            | 10   | 5.28.13 | 3 R388 | pol pool 2            | 45   | 5.28.13 | 4 R383 | pol pool 2            | 295  |
| 5.13.13 | 1 R385 | pol pool 3            | 0    | 5.13.13 | 2 R384 | pol pool 3            | 80   | 5.28.13 | 3 R388 | pol pool 3            | 0    | 5.28.13 | 4 R383 | pol pool 3            | 0    |
| 5.13.13 | 1 R385 | pol pool 4            | 0    | 5.13.13 | 2 R384 | pol pool 4            | 0    | 5.28.13 | 3 R388 | pol pool 4            | 0    | 5.28.13 | 4 R383 | pol pool 4            | 0    |
| 5.13.13 | 1 R385 | nef pool 1            | 0    | 5.13.13 | 2 R384 | nef pool 1            | 5    | 5.28.13 | 3 R388 | nef pool 1            | 0    | 5.28.13 | 4 R383 | nef pool 1            | 0    |
| 5.13.13 | 1 R385 | nef pool 2            | 0    | 5.13.13 | 2 R384 | nef pool 2            | 10   | 5.28.13 | 3 R388 | nef pool 2            | 85   | 5.28.13 | 4 R383 | nef pool 2            | 125  |
| 5.13.13 | 1 R385 | nef pool 3            | 0    | 5.13.13 | 2 R384 | nef pool 3            | 25   | 5.28.13 | 3 R388 | nef pool 3            | 0    | 5.28.13 | 4 R383 | nef pool 3            | 0    |
| 5.13.13 | 1 R385 | hlgG4-HIV5sep         | 0    | 5.13.13 | 2 R384 | hlgG4-HIV5sep         | 0    | 5.28.13 | 3 R388 | hlgG4-HIV5sep         | 0    | 5.28.13 | 4 R383 | hlgG4-HIV5sep         | 0    |
| 5.13.13 | 1 R385 | hlgG4                 | 0    | 5.13.13 | 2 R384 | hlgG4                 | 0    | 5.28.13 | 3 R388 | hlgG4                 | 0    | 5.28.13 | 4 R383 | hlgG4                 | 0    |
| 5.13.13 | 1 R385 | Cohesin-nef66 (C1077) | 0    | 5.13.13 | 2 R384 | Cohesin-nef66 (C1077) | 25   | 5.28.13 | 3 R388 | Cohesin-nef66 (C1077) | 35   | 5.28.13 | 4 R383 | Cohesin-nef66 (C1077) | 0    |
| 5.13.13 | 1 R385 | Cohesin-nef66 (C1078) | 0    | 5.13.13 | 2 R384 | Cohesin-nef66 (C1078) | 10   | 5.28.13 | 3 R388 | Cohesin-nef66 (C1078) | 15   | 5.28.13 | 4 R383 | Cohesin-nef66 (C1078) | 0    |
| 5.13.13 | 1 R385 | Cohesin-gag17         | 0    | 5.13.13 | 2 R384 | Cohesin-gag17         | 5    | 5.28.13 | 3 R388 | Cohesin-gag17         | 0    | 5.28.13 | 4 R383 | Cohesin-gag17         | 0    |
| 5.13.13 | 1 R385 | Cohesin-gag253        | 10   | 5.13.13 | 2 R384 | Cohesin-gag253        | 25   | 5.28.13 | 3 R388 | Cohesin-gag253        | 15   | 5.28.13 | 4 R383 | Cohesin-gag253        | 30   |
| 5.13.13 | 1 R385 | Cohesin-pol158        | 5    | 5.13.13 | 2 R384 | Cohesin-pol158        | 35   | 5.28.13 | 3 R388 | Cohesin-pol158        | 55   | 5.28.13 | 4 R383 | Cohesin-pol158        | 50   |
| 5.13.13 | 1 R385 | Cohesin               | 0    | 5.13.13 | 2 R384 | Cohesin               | 0    | 5.28.13 | 3 R388 | Cohesin               | 0    | 5.28.13 | 4 R383 | Cohesin               | 0    |
| 5.13.13 | 1 R385 | pha                   | 2480 | 5.13.13 | 2 R384 | pha                   | 2920 | 5.28.13 | 3 R388 | pha                   | 3095 | 5.28.13 | 4 R383 | pha                   | 2490 |
| 5.28.13 | 1 R370 | Non                   | 0    | 5.28.13 | 2 R376 | Non                   | 0    | 7.23.13 | 3 R368 | Non                   | 0    | 7.23.13 | 4 R386 | Non                   | 0    |
| 5.28.13 | 1 R370 | p24 pool 1            | 0    | 5.28.13 | 2 R376 | p24 pool 1            | 25   | 7.23.13 | 3 R368 | p24 pool 1            | 5    | 7.23.13 | 4 R386 | p24 pool 1            | 0    |
| 5.28.13 | 1 R370 | p24 pool 2            | 0    | 5.28.13 | 2 R376 | p24 pool 2            | 5    | 7.23.13 | 3 R368 | p24 pool 2            | 0    | 7.23.13 | 4 R386 | p24 pool 2            | 5    |
| 5.28.13 | 1 R370 | p24 pool 3            | 5    | 5.28.13 | 2 R376 | p24 pool 3            | 10   | 7.23.13 | 3 R368 | p24 pool 3            | 5    | 7.23.13 | 4 R386 | p24 pool 3            | 40   |
| 5.28.13 | 1 R370 | p24 pool 4            | 5    | 5.28.13 | 2 R376 | p24 pool 4            | 5    | 7.23.13 | 3 R368 | p24 pool 4            | 5    | 7.23.13 | 4 R386 | p24 pool 4            | 15   |
| 5.28.13 | 1 R370 | p24 pool 5            | 0    | 5.28.13 | 2 R376 | p24 pool 5            | 0    | 7.23.13 | 3 R368 | p24 pool 5            | 10   | 7.23.13 | 4 R386 | p24 pool 5            | 20   |
| 5.28.13 | 1 R370 | p2/p6/p7 pool 1       | 5    | 5.28.13 | 2 R376 | p2/p6/p7 pool 1       | 0    | 7.23.13 | 3 R368 | p2/p6/p7 pool 1       | 5    | 7.23.13 | 4 R386 | p2/p6/p7 pool 1       | 0    |
| 5.28.13 | 1 R370 | p2/p6/p7 pool 2       | 5    | 5.28.13 | 2 R376 | p2/p6/p7 pool 2       | 5    | 7.23.13 | 3 R368 | p2/p6/p7 pool 2       | 10   | 7.23.13 | 4 R386 | p2/p6/p7 pool 2       | 0    |
| 5.28.13 | 1 R370 | p2/p6/p7 pool 3       | 0    | 5.28.13 | 2 R376 | p2/p6/p7 pool 3       | 5    | 7.23.13 | 3 R368 | p2/p6/p7 pool 3       | 5    | 7.23.13 | 4 R386 | p2/p6/p7 pool 3       | 10   |
| 5.28.13 | 1 R370 | p17 pool 1            | 0    | 5.28.13 | 2 R376 | p17 pool 1            | 0    | 7.23.13 | 3 R368 | p17 pool 1            | 5    | 7.23.13 | 4 R386 | p17 pool 1            | 5    |
| 5.28.13 | 1 R370 | p17 pool 2            | 0    | 5.28.13 | 2 R376 | p17 pool 2            | 0    | 7.23.13 | 3 R368 | p17 pool 2            | 15   | 7.23.13 | 4 R386 | p17 pool 2            | 5    |
| 5.28.13 | 1 R370 | p17 pool 3            | 0    | 5.28.13 | 2 R376 | p17 pool 3            | 0    | 7.23.13 | 3 R368 | p17 pool 3            | 10   | 7.23.13 | 4 R386 | p17 pool 3            | 5    |
| 5.28.13 | 1 R370 | pol pool 1            | 10   | 5.28.13 | 2 R376 | pol pool 1            | 5    | 7.23.13 | 3 R368 | pol pool 1            | 0    | 7.23.13 | 4 R386 | pol pool 1            | 10   |
| 5.28.13 | 1 R370 | pol pool 2            | 5    | 5.28.13 | 2 R376 | pol pool 2            | 5    | 7.23.13 | 3 R368 | pol pool 2            | 15   | 7.23.13 | 4 R386 | pol pool 2            | 65   |
| 5.28.13 | 1 R370 | pol pool 3            | 5    | 5.28.13 | 2 R376 | pol pool 3            | 15   | 7.23.13 | 3 R368 | pol pool 3            | 40   | 7.23.13 | 4 R386 | pol pool 3            | 0    |
| 5.28.13 | 1 R370 | pol pool 4            | 5    | 5.28.13 | 2 R376 | pol pool 4            | 0    | 7.23.13 | 3 R368 | pol pool 4            | 15   | 7.23.13 | 4 R386 | pol pool 4            | 0    |
| 5.28.13 | 1 R370 | nef pool 1            | 0    | 5.28.13 | 2 R376 | nef pool 1            | 5    | 7.23.13 | 3 R368 | nef pool 1            | 5    | 7.23.13 | 4 R386 | nef pool 1            |      |



|         |        |                       |      |         |        |                       |      |         |        |                       |      |         |        |                       |      |
|---------|--------|-----------------------|------|---------|--------|-----------------------|------|---------|--------|-----------------------|------|---------|--------|-----------------------|------|
| 5.28.13 | 1 R370 | pha                   | 1560 | 5.28.13 | 2 R376 | pha                   | 2350 | 7.23.13 | 3 R368 | pha                   | 2935 | 7.23.13 | 4 R386 | pha                   | 3150 |
| 5.28.13 | 1 R371 | Non                   | 0    | 5.28.13 | 2 R377 | Non                   | 0    | 7.23.13 | 3 R375 | Non                   | 0    | 7.23.13 | 4 R389 | Non                   | 0    |
| 5.28.13 | 1 R371 | p24 pool 1            | 25   | 5.28.13 | 2 R377 | p24 pool 1            | 0    | 7.23.13 | 3 R375 | p24 pool 1            | 0    | 7.23.13 | 4 R389 | p24 pool 1            | 0    |
| 5.28.13 | 1 R371 | p24 pool 2            | 10   | 5.28.13 | 2 R377 | p24 pool 2            | 0    | 7.23.13 | 3 R375 | p24 pool 2            | 0    | 7.23.13 | 4 R389 | p24 pool 2            | 0    |
| 5.28.13 | 1 R371 | p24 pool 3            | 0    | 5.28.13 | 2 R377 | p24 pool 3            | 90   | 7.23.13 | 3 R375 | p24 pool 3            | 0    | 7.23.13 | 4 R389 | p24 pool 3            | 60   |
| 5.28.13 | 1 R371 | p24 pool 4            | 45   | 5.28.13 | 2 R377 | p24 pool 4            | 30   | 7.23.13 | 3 R375 | p24 pool 4            | 5    | 7.23.13 | 4 R389 | p24 pool 4            | 5    |
| 5.28.13 | 1 R371 | p24 pool 5            | 0    | 5.28.13 | 2 R377 | p24 pool 5            | 0    | 7.23.13 | 3 R375 | p24 pool 5            | 0    | 7.23.13 | 4 R389 | p24 pool 5            | 5    |
| 5.28.13 | 1 R371 | p2/p6/p7 pool 1       | 5    | 5.28.13 | 2 R377 | p2/p6/p7 pool 1       | 0    | 7.23.13 | 3 R375 | p2/p6/p7 pool 1       | 5    | 7.23.13 | 4 R389 | p2/p6/p7 pool 1       | 0    |
| 5.28.13 | 1 R371 | p2/p6/p7 pool 2       | 0    | 5.28.13 | 2 R377 | p2/p6/p7 pool 2       | 0    | 7.23.13 | 3 R375 | p2/p6/p7 pool 2       | 0    | 7.23.13 | 4 R389 | p2/p6/p7 pool 2       | 0    |
| 5.28.13 | 1 R371 | p2/p6/p7 pool 3       | 0    | 5.28.13 | 2 R377 | p2/p6/p7 pool 3       | 0    | 7.23.13 | 3 R375 | p2/p6/p7 pool 3       | 5    | 7.23.13 | 4 R389 | p2/p6/p7 pool 3       | 0    |
| 5.28.13 | 1 R371 | p17 pool 1            | 0    | 5.28.13 | 2 R377 | p17 pool 1            | 0    | 7.23.13 | 3 R375 | p17 pool 1            | 5    | 7.23.13 | 4 R389 | p17 pool 1            | 5    |
| 5.28.13 | 1 R371 | p17 pool 2            | 0    | 5.28.13 | 2 R377 | p17 pool 2            | 0    | 7.23.13 | 3 R375 | p17 pool 2            | 0    | 7.23.13 | 4 R389 | p17 pool 2            | 0    |
| 5.28.13 | 1 R371 | p17 pool 3            | 0    | 5.28.13 | 2 R377 | p17 pool 3            | 0    | 7.23.13 | 3 R375 | p17 pool 3            | 5    | 7.23.13 | 4 R389 | p17 pool 3            | 0    |
| 5.28.13 | 1 R371 | pol pool 1            | 0    | 5.28.13 | 2 R377 | pol pool 1            | 0    | 7.23.13 | 3 R375 | pol pool 1            | 5    | 7.23.13 | 4 R389 | pol pool 1            | 0    |
| 5.28.13 | 1 R371 | pol pool 2            | 125  | 5.28.13 | 2 R377 | pol pool 2            | 910  | 7.23.13 | 3 R375 | pol pool 2            | 175  | 7.23.13 | 4 R389 | pol pool 2            | 500  |
| 5.28.13 | 1 R371 | pol pool 3            | 0    | 5.28.13 | 2 R377 | pol pool 3            | 0    | 7.23.13 | 3 R375 | pol pool 3            | 10   | 7.23.13 | 4 R389 | pol pool 3            | 0    |
| 5.28.13 | 1 R371 | pol pool 4            | 0    | 5.28.13 | 2 R377 | pol pool 4            | 0    | 7.23.13 | 3 R375 | pol pool 4            | 0    | 7.23.13 | 4 R389 | pol pool 4            | 0    |
| 5.28.13 | 1 R371 | nef pool 1            | 0    | 5.28.13 | 2 R377 | nef pool 1            | 0    | 7.23.13 | 3 R375 | nef pool 1            | 5    | 7.23.13 | 4 R389 | nef pool 1            | 0    |
| 5.28.13 | 1 R371 | nef pool 2            | 20   | 5.28.13 | 2 R377 | nef pool 2            | 15   | 7.23.13 | 3 R375 | nef pool 2            | 60   | 7.23.13 | 4 R389 | nef pool 2            | 75   |
| 5.28.13 | 1 R371 | nef pool 3            | 0    | 5.28.13 | 2 R377 | nef pool 3            | 15   | 7.23.13 | 3 R375 | nef pool 3            | 15   | 7.23.13 | 4 R389 | nef pool 3            | 0    |
| 5.28.13 | 1 R371 | hlgG4-HIV5sep         | 0    | 5.28.13 | 2 R377 | hlgG4-HIV5sep         | 0    | 7.23.13 | 3 R375 | hlgG4-HIV5sep         | 0    | 7.23.13 | 4 R389 | hlgG4-HIV5sep         | 0    |
| 5.28.13 | 1 R371 | hlgG4                 | 0    | 5.28.13 | 2 R377 | hlgG4                 | 0    | 7.23.13 | 3 R375 | hlgG4                 | 0    | 7.23.13 | 4 R389 | hlgG4                 | 0    |
| 5.28.13 | 1 R371 | Cohesin-nef66 (C1077) | 0    | 5.28.13 | 2 R377 | Cohesin-nef66 (C1077) | 0    | 7.23.13 | 3 R375 | Cohesin-nef66 (C1077) | 5    | 7.23.13 | 4 R389 | Cohesin-nef66 (C1077) | 0    |
| 5.28.13 | 1 R371 | Cohesin-nef66 (C1078) | 0    | 5.28.13 | 2 R377 | Cohesin-nef66 (C1078) | 0    | 7.23.13 | 3 R375 | Cohesin-nef66 (C1078) | 0    | 7.23.13 | 4 R389 | Cohesin-nef66 (C1078) | 5    |
| 5.28.13 | 1 R371 | Cohesin-gag17         | 0    | 5.28.13 | 2 R377 | Cohesin-gag17         | 0    | 7.23.13 | 3 R375 | Cohesin-gag17         | 0    | 7.23.13 | 4 R389 | Cohesin-gag17         | 0    |
| 5.28.13 | 1 R371 | Cohesin-gag253        | 0    | 5.28.13 | 2 R377 | Cohesin-gag253        | 5    | 7.23.13 | 3 R375 | Cohesin-gag253        | 5    | 7.23.13 | 4 R389 | Cohesin-gag253        | 115  |
| 5.28.13 | 1 R371 | Cohesin-pol158        | 100  | 5.28.13 | 2 R377 | Cohesin-pol158        | 915  | 7.23.13 | 3 R375 | Cohesin-pol158        | 115  | 7.23.13 | 4 R389 | Cohesin-pol158        | 345  |
| 5.28.13 | 1 R371 | Cohesin               | 0    | 5.28.13 | 2 R377 | Cohesin               | 0    | 7.23.13 | 3 R375 | Cohesin               | 5    | 7.23.13 | 4 R389 | Cohesin               | 0    |
| 5.28.13 | 1 R371 | pha                   | 2805 | 5.28.13 | 2 R377 | pha                   | 3405 | 7.23.13 | 3 R375 | pha                   | 2340 | 7.23.13 | 4 R389 | pha                   | 2740 |
| 5.28.13 | 1 R373 | Non                   | 0    | 5.28.13 | 2 R378 | Non                   | 0    | 7.23.13 | 3 R379 | Non                   | 0    | 7.23.13 | 4 R390 | Non                   | 0    |
| 5.28.13 | 1 R373 | p24 pool 1            | 5    | 5.28.13 | 2 R378 | p24 pool 1            | 5    | 7.23.13 | 3 R379 | p24 pool 1            | 5    | 7.23.13 | 4 R390 | p24 pool 1            | 0    |
| 5.28.13 | 1 R373 | p24 pool 2            | 0    | 5.28.13 | 2 R378 | p24 pool 2            | 5    | 7.23.13 | 3 R379 | p24 pool 2            | 5    | 7.23.13 | 4 R390 | p24 pool 2            | 0    |
| 5.28.13 | 1 R373 | p24 pool 3            | 5    | 5.28.13 | 2 R378 | p24 pool 3            | 35   | 7.23.13 | 3 R379 | p24 pool 3            | 45   | 7.23.13 | 4 R390 | p24 pool 3            | 0    |
| 5.28.13 | 1 R373 | p24 pool 4            | 0    | 5.28.13 | 2 R378 | p24 pool 4            | 5    | 7.23.13 | 3 R379 | p24 pool 4            | 25   | 7.23.13 | 4 R390 | p24 pool 4            | 0    |
| 5.28.13 | 1 R373 | p24 pool 5            | 0    | 5.28.13 | 2 R378 | p24 pool 5            | 0    | 7.23.13 | 3 R379 | p24 pool 5            | 0    | 7.23.13 | 4 R390 | p24 pool 5            | 0    |
| 5.28.13 | 1 R373 | p2/p6/p7 pool 1       | 0    | 5.28.13 | 2 R378 | p2/p6/p7 pool 1       | 10   | 7.23.13 | 3 R379 | p2/p6/p7 pool 1       | 0    | 7.23.13 | 4 R390 | p2/p6/p7 pool 1       | 0    |
| 5.28.13 | 1 R373 | p2/p6/p7 pool 2       | 0    | 5.28.13 | 2 R378 | p2/p6/p7 pool 2       | 0    | 7.23.13 | 3 R379 | p2/p6/p7 pool 2       | 0    | 7.23.13 | 4 R390 | p2/p6/p7 pool 2       | 0    |
| 5.28.13 | 1 R373 | p2/p6/p7 pool 3       | 0    | 5.28.13 | 2 R378 | p2/p6/p7 pool 3       | 0    | 7.23.13 | 3 R379 | p2/p6/p7 pool 3       | 0    | 7.23.13 | 4 R390 | p2/p6/p7 pool 3       | 0    |
| 5.28.13 | 1 R373 | p17 pool 1            | 0    | 5.28.13 | 2 R378 | p17 pool 1            | 0    | 7.23.13 | 3 R379 | p17 pool 1            | 5    | 7.23.13 | 4 R390 | p17 pool 1            | 0    |
| 5.28.13 | 1 R373 | p17 pool 2            | 0    | 5.28.13 | 2 R378 | p17 pool 2            | 0    | 7.23.13 | 3 R379 | p17 pool 2            | 0    | 7.23.13 | 4 R390 | p17 pool 2            | 0    |
| 5.28.13 | 1 R373 | p17 pool 3            | 0    | 5.28.13 | 2 R378 | p17 pool 3            | 0    | 7.23.13 | 3 R379 | p17 pool 3            | 5    | 7.23.13 | 4 R390 | p17 pool 3            | 0    |
| 5.28.13 | 1 R373 | pol pool 1            | 5    | 5.28.13 | 2 R378 | pol pool 1            | 0    | 7.23.13 | 3 R379 | pol pool 1            | 0    | 7.23.13 | 4 R390 | pol pool 1            | 0    |
| 5.28.13 | 1 R373 | pol pool 2            | 5    | 5.28.13 | 2 R378 | pol pool 2            | 125  | 7.23.13 | 3 R379 | pol pool 2            | 645  | 7.23.13 | 4 R390 | pol pool 2            | 10   |
| 5.28.13 | 1 R373 | pol pool 3            | 0    | 5.28.13 | 2 R378 | pol pool 3            | 10   | 7.23.13 | 3 R379 | pol pool 3            | 0    | 7.23.13 | 4 R390 | pol pool 3            | 0    |
| 5.28.13 | 1 R373 | pol pool 4            | 0    | 5.28.13 | 2 R378 | pol pool 4            | 0    | 7.23.13 | 3 R379 | pol pool 4            | 10   | 7.23.13 | 4 R390 | pol pool 4            | 0    |
| 5.28.13 | 1 R373 | nef pool 1            | 0    | 5.28.13 | 2 R378 | nef pool 1            | 0    | 7.23.13 | 3 R379 | nef pool 1            | 5    | 7.23.13 | 4 R390 | nef pool 1            | 0    |
| 5.28.13 | 1 R373 | nef pool 2            | 0    | 5.28.13 | 2 R378 | nef pool 2            | 0    | 7.23.13 | 3 R379 | nef pool 2            | 45   | 7.23.13 | 4 R390 | nef pool 2            | 0    |
| 5.28.13 | 1 R373 | nef pool 3            | 0    | 5.28.13 | 2 R378 | nef pool 3            | 0    | 7.23.13 | 3 R379 | nef pool 3            | 0    | 7.23.13 | 4 R390 | nef pool 3            | 0    |
| 5.28.13 | 1 R373 | hlgG4-HIV5sep         | 0    | 5.28.13 | 2 R378 | hlgG4-HIV5sep         | 0    | 7.23.13 | 3 R379 | hlgG4-HIV5sep         | 0    | 7.23.13 | 4 R390 | hlgG4-HIV5sep         | 0    |
| 5.28.13 | 1 R373 | hlgG4                 | 0    | 5.28.13 | 2 R378 | hlgG4                 | 0    | 7.23.13 | 3 R379 | hlgG4                 | 0    | 7.23.13 | 4 R390 | hlgG4                 | 0    |
| 5.28.13 | 1 R373 | Cohesin-nef66 (C1077) | 0    | 5.28.13 | 2 R378 | Cohesin-nef66 (C1077) | 10   | 7.23.13 | 3 R379 | Cohesin-nef66 (C1077) | 0    | 7.23.13 | 4 R390 | Cohesin-nef66 (C1077) | 0    |
| 5.28.13 | 1 R373 | Cohesin-nef66 (C1078) | 0    | 5.28.13 | 2 R378 | Cohesin-nef66 (C1078) | 5    | 7.23.13 | 3 R379 | Cohesin-nef66 (C1078) | 45   | 7.23.13 | 4 R390 | Cohesin-nef66 (C1078) | 0    |
| 5.28.13 | 1 R373 | Cohesin-gag17         | 5    | 5.28.13 | 2 R378 | Cohesin-gag17         | 0    | 7.23.13 | 3 R379 | Cohesin-gag17         | 0    | 7.23.13 | 4 R390 | Cohesin-gag17         | 0    |
| 5.28.13 | 1 R373 | Cohesin-gag253        | 5    | 5.28.13 | 2 R378 | Cohesin-gag253        | 15   | 7.23.13 | 3 R379 | Cohesin-gag253        | 40   | 7.23.13 | 4 R390 | Cohesin-gag253        | 5    |
| 5.28.13 | 1 R373 | Cohesin-pol158        | 5    | 5.28.13 | 2 R378 | Cohesin-pol158        | 185  | 7.23.13 | 3 R379 | Cohesin-pol158        | 370  | 7.23.13 | 4 R390 | Cohesin-pol158        | 15   |
| 5.28.13 | 1 R373 | Cohesin               | 0    | 5.28.13 | 2 R378 | Cohesin               | 5    | 7.23.13 | 3 R379 | Cohesin               | 5    | 7.23.13 | 4 R390 | Cohesin               | 0    |
| 5.28.13 | 1 R373 | pha                   | 1710 | 5.28.13 | 2 R378 | pha                   | 2745 | 7.23.13 | 3 R379 | pha                   | 2685 | 7.23.13 | 4 R390 | pha                   | 2405 |
| 5.28.13 | 1 R374 | Non                   | 0    | 5.28.13 | 2 R380 | Non                   | 0    | 7.23.13 | 3 R381 | Non                   | 0    | 7.23.13 | 4 R391 | Non                   | 0    |
| 5.28.13 | 1 R374 | p24 pool 1            | 5    | 5.28.13 | 2 R380 | p24 pool 1            | 0    | 7.23.13 | 3 R381 | p24 pool 1            | 10   | 7.23.13 | 4 R391 | p24 pool 1            | 10   |
| 5.28.13 | 1 R374 | p24 pool 2            | 15   | 5.28.13 | 2 R380 | p24 pool 2            | 0    | 7.23.13 | 3 R381 | p24 pool 2            | 5    | 7.23.13 | 4 R391 | p24 pool 2            | 0    |
| 5.28.13 | 1 R374 | p24 pool 3            | 210  | 5.28.13 | 2 R380 | p24 pool 3            | 200  | 7.23.13 | 3 R381 | p24 pool 3            | 15   | 7.23.13 | 4 R391 | p24 pool 3            | 15   |
| 5.28.13 | 1 R374 | p24 pool 4            | 60   | 5.28.13 | 2 R380 | p24 pool 4            | 5    | 7.23.13 | 3 R381 | p24 pool 4            | 15   | 7.23.13 | 4 R391 | p24 pool 4            | 5    |
| 5.28.13 | 1 R374 | p24 pool 5            | 5    | 5.28.13 | 2 R380 | p24 pool 5            | 0    | 7.23.13 | 3 R381 | p24 pool 5            | 5    | 7.23.13 | 4 R391 | p24 pool 5            | 0    |
| 5.28.13 | 1 R374 | p2/p6/p7 pool 1       | 5    | 5.28.13 | 2 R380 | p2/p6/p7 pool 1       | 0    | 7.23.13 | 3 R381 | p2/p6/p7 pool 1       | 0    | 7.23.13 | 4 R391 | p2/p6/p7 pool 1       | 0    |
| 5.28.13 | 1 R374 | p2/p6/p7 pool 2       | 5    | 5.28.13 | 2 R380 | p2/p6/p7 pool 2       | 0    | 7.23.13 | 3 R381 | p2/p6/p7 pool 2       | 0    | 7.23.13 | 4 R391 | p2/p6/p7 pool 2       | 0    |
| 5.28.13 | 1 R374 | p2/p6/p7 pool 3       | 0    | 5.28.13 | 2 R380 | p2/p6/p7 pool 3       | 0    | 7.23.13 | 3 R381 | p2/p6/p7 pool 3       | 0    | 7.23.13 | 4 R391 | p2/p6/p7 pool 3       | 0    |
| 5.28.13 | 1 R374 | p17 pool 1            | 0    | 5.28.13 | 2 R380 | p17 pool 1            | 0    | 7.23.13 | 3 R381 | p17 pool 1            | 5    | 7.23.13 | 4 R391 | p17 pool 1            | 0    |
| 5.28.13 | 1 R374 | p17 pool 2            | 5    | 5.28.13 | 2 R380 | p17 pool 2            | 0    | 7.23.13 | 3 R381 | p17 pool 2            | 0    | 7.23.13 | 4 R391 | p17 pool 2            | 10   |
| 5.28.13 | 1 R374 | p17 pool 3            | 5    | 5.28.13 | 2 R380 | p17 pool 3            | 0    | 7.23.13 | 3 R381 | p17 pool 3            | 0    | 7.23.13 | 4 R391 | p17 pool 3            | 0    |
| 5.28.13 | 1 R374 | pol pool 1            | 5    | 5.28.13 | 2 R380 | pol pool 1            | 0    | 7.23.13 | 3 R381 | pol pool 1            | 0    | 7.23.13 | 4 R391 | pol pool 1            | 0    |
| 5.28.13 | 1 R374 | pol pool 2            | 5    | 5.28.13 | 2 R380 | pol pool 2            | 0    | 7.23.13 | 3 R381 | pol pool 2            | 155  | 7.23.13 | 4 R391 | pol pool 2            | 0    |
| 5.28.13 | 1 R374 | pol pool 3            | 5    | 5.28.13 | 2 R380 | pol pool 3            | 25   | 7.23.13 | 3 R381 | pol pool 3            | 0    | 7.23.13 | 4 R391 | pol pool 3            | 0    |
| 5.28.13 | 1 R374 | pol pool 4            | 5    | 5.28.13 | 2 R380 | pol pool 4            | 0    | 7.23.13 | 3 R381 | pol pool 4            | 0    | 7.23.13 | 4 R391 | pol pool 4            | 0    |
| 5.28.13 | 1 R374 | nef pool 1            | 5    | 5.28.13 | 2 R380 | nef pool 1            | 0    | 7.23.13 | 3 R381 | nef pool 1            | 0    | 7.23.13 | 4 R391 | nef pool 1            | 5    |
| 5.28.13 | 1 R374 | nef pool 2            | 30   | 5.28.13 | 2 R380 | nef pool 2            | 80   | 7.23.13 | 3 R381 | nef pool 2            | 20   | 7.23.13 | 4 R391 | nef pool 2            | 5    |
| 5.28.13 | 1 R374 | nef pool 3            | 10   | 5.28.13 | 2 R380 | nef pool 3            | 75   | 7.23.13 | 3 R381 | nef pool 3            | 0    | 7.23.13 | 4 R391 | nef pool 3            | 0    |
| 5.28.13 | 1 R374 | hlgG4-HIV5sep         | 0    | 5.28.13 | 2 R380 | hlgG4-HIV5sep         | 0    | 7.23.13 | 3 R381 | hlgG4-HIV5sep         | 0    | 7.23.13 | 4 R391 | hlgG4-HIV5sep         |      |

|         |        |                       |      |         |        |                       |      |         |        |                       |      |         |        |                       |      |
|---------|--------|-----------------------|------|---------|--------|-----------------------|------|---------|--------|-----------------------|------|---------|--------|-----------------------|------|
| 5.28.13 | 1 R369 | p24 pool 3            | 375  | 5.28.13 | 2 R382 | p24 pool 3            | 15   | 7.23.13 | 3 R387 | p24 pool 3            | 0    | 7.23.13 | 4 R372 | p24 pool 3            | 0    |
| 5.28.13 | 1 R369 | p24 pool 4            | 15   | 5.28.13 | 2 R382 | p24 pool 4            | 40   | 7.23.13 | 3 R387 | p24 pool 4            | 0    | 7.23.13 | 4 R372 | p24 pool 4            | 0    |
| 5.28.13 | 1 R369 | p24 pool 5            | 0    | 5.28.13 | 2 R382 | p24 pool 5            | 0    | 7.23.13 | 3 R387 | p24 pool 5            | 0    | 7.23.13 | 4 R372 | p24 pool 5            | 0    |
| 5.28.13 | 1 R369 | p2/p6/p7 pool 1       | 0    | 5.28.13 | 2 R382 | p2/p6/p7 pool 1       | 5    | 7.23.13 | 3 R387 | p2/p6/p7 pool 1       | 0    | 7.23.13 | 4 R372 | p2/p6/p7 pool 1       | 0    |
| 5.28.13 | 1 R369 | p2/p6/p7 pool 2       | 0    | 5.28.13 | 2 R382 | p2/p6/p7 pool 2       | 0    | 7.23.13 | 3 R387 | p2/p6/p7 pool 2       | 0    | 7.23.13 | 4 R372 | p2/p6/p7 pool 2       | 0    |
| 5.28.13 | 1 R369 | p2/p6/p7 pool 3       | 0    | 5.28.13 | 2 R382 | p2/p6/p7 pool 3       | 0    | 7.23.13 | 3 R387 | p2/p6/p7 pool 3       | 0    | 7.23.13 | 4 R372 | p2/p6/p7 pool 3       | 0    |
| 5.28.13 | 1 R369 | p17 pool 1            | 0    | 5.28.13 | 2 R382 | p17 pool 1            | 5    | 7.23.13 | 3 R387 | p17 pool 1            | 0    | 7.23.13 | 4 R372 | p17 pool 1            | 0    |
| 5.28.13 | 1 R369 | p17 pool 2            | 0    | 5.28.13 | 2 R382 | p17 pool 2            | 0    | 7.23.13 | 3 R387 | p17 pool 2            | 0    | 7.23.13 | 4 R372 | p17 pool 2            | 0    |
| 5.28.13 | 1 R369 | p17 pool 3            | 0    | 5.28.13 | 2 R382 | p17 pool 3            | 0    | 7.23.13 | 3 R387 | p17 pool 3            | 0    | 7.23.13 | 4 R372 | p17 pool 3            | 0    |
| 5.28.13 | 1 R369 | pol pool 1            | 0    | 5.28.13 | 2 R382 | pol pool 1            | 5    | 7.23.13 | 3 R387 | pol pool 1            | 0    | 7.23.13 | 4 R372 | pol pool 1            | 10   |
| 5.28.13 | 1 R369 | pol pool 2            | 0    | 5.28.13 | 2 R382 | pol pool 2            | 5    | 7.23.13 | 3 R387 | pol pool 2            | 0    | 7.23.13 | 4 R372 | pol pool 2            | 190  |
| 5.28.13 | 1 R369 | pol pool 3            | 0    | 5.28.13 | 2 R382 | pol pool 3            | 375  | 7.23.13 | 3 R387 | pol pool 3            | 0    | 7.23.13 | 4 R372 | pol pool 3            | 0    |
| 5.28.13 | 1 R369 | pol pool 4            | 0    | 5.28.13 | 2 R382 | pol pool 4            | 0    | 7.23.13 | 3 R387 | pol pool 4            | 0    | 7.23.13 | 4 R372 | pol pool 4            | 0    |
| 5.28.13 | 1 R369 | nef pool 1            | 0    | 5.28.13 | 2 R382 | nef pool 1            | 0    | 7.23.13 | 3 R387 | nef pool 1            | 0    | 7.23.13 | 4 R372 | nef pool 1            | 0    |
| 5.28.13 | 1 R369 | nef pool 2            | 210  | 5.28.13 | 2 R382 | nef pool 2            | 65   | 7.23.13 | 3 R387 | nef pool 2            | 0    | 7.23.13 | 4 R372 | nef pool 2            | 0    |
| 5.28.13 | 1 R369 | nef pool 3            | 5    | 5.28.13 | 2 R382 | nef pool 3            | 5    | 7.23.13 | 3 R387 | nef pool 3            | 0    | 7.23.13 | 4 R372 | nef pool 3            | 0    |
| 5.28.13 | 1 R369 | hlgG4-HIV5sep         | 0    | 5.28.13 | 2 R382 | hlgG4-HIV5sep         | 0    | 7.23.13 | 3 R387 | hlgG4-HIV5sep         | 0    | 7.23.13 | 4 R372 | hlgG4-HIV5sep         | 0    |
| 5.28.13 | 1 R369 | hlgG4                 | 0    | 5.28.13 | 2 R382 | hlgG4                 | 0    | 7.23.13 | 3 R387 | hlgG4                 | 0    | 7.23.13 | 4 R372 | hlgG4                 | 0    |
| 5.28.13 | 1 R369 | Cohesin-nef66 (C1077) | 20   | 5.28.13 | 2 R382 | Cohesin-nef66 (C1077) | 0    | 7.23.13 | 3 R387 | Cohesin-nef66 (C1077) | 0    | 7.23.13 | 4 R372 | Cohesin-nef66 (C1077) | 0    |
| 5.28.13 | 1 R369 | Cohesin-nef66 (C1078) | 0    | 5.28.13 | 2 R382 | Cohesin-nef66 (C1078) | 0    | 7.23.13 | 3 R387 | Cohesin-nef66 (C1078) | 0    | 7.23.13 | 4 R372 | Cohesin-nef66 (C1078) | 0    |
| 5.28.13 | 1 R369 | Cohesin-gag17         | 0    | 5.28.13 | 2 R382 | Cohesin-gag17         | 0    | 7.23.13 | 3 R387 | Cohesin-gag17         | 0    | 7.23.13 | 4 R372 | Cohesin-gag17         | 0    |
| 5.28.13 | 1 R369 | Cohesin-gag253        | 110  | 5.28.13 | 2 R382 | Cohesin-gag253        | 20   | 7.23.13 | 3 R387 | Cohesin-gag253        | 0    | 7.23.13 | 4 R372 | Cohesin-gag253        | 5    |
| 5.28.13 | 1 R369 | Cohesin-pol158        | 5    | 5.28.13 | 2 R382 | Cohesin-pol158        | 245  | 7.23.13 | 3 R387 | Cohesin-pol158        | 0    | 7.23.13 | 4 R372 | Cohesin-pol158        | 115  |
| 5.28.13 | 1 R369 | Cohesin               | 0    | 5.28.13 | 2 R382 | Cohesin               | 0    | 7.23.13 | 3 R387 | Cohesin               | 0    | 7.23.13 | 4 R372 | Cohesin               | 0    |
| 5.28.13 | 1 R369 | pha                   | 2635 | 5.28.13 | 2 R382 | pha                   | 2505 | 7.23.13 | 3 R387 | pha                   | 0    | 7.23.13 | 4 R372 | pha                   | 2230 |
| 5.28.13 | 1 R385 | Non                   | 0    | 5.28.13 | 2 R384 | Non                   | 0    | 7.23.13 | 3 R388 | Non                   | 0    | 7.23.13 | 4 R383 | Non                   | 0    |
| 5.28.13 | 1 R385 | p24 pool 1            | 0    | 5.28.13 | 2 R384 | p24 pool 1            | 0    | 7.23.13 | 3 R388 | p24 pool 1            | 0    | 7.23.13 | 4 R383 | p24 pool 1            | 5    |
| 5.28.13 | 1 R385 | p24 pool 2            | 10   | 5.28.13 | 2 R384 | p24 pool 2            | 10   | 7.23.13 | 3 R388 | p24 pool 2            | 10   | 7.23.13 | 4 R383 | p24 pool 2            | 5    |
| 5.28.13 | 1 R385 | p24 pool 3            | 0    | 5.28.13 | 2 R384 | p24 pool 3            | 70   | 7.23.13 | 3 R388 | p24 pool 3            | 0    | 7.23.13 | 4 R383 | p24 pool 3            | 120  |
| 5.28.13 | 1 R385 | p24 pool 4            | 15   | 5.28.13 | 2 R384 | p24 pool 4            | 80   | 7.23.13 | 3 R388 | p24 pool 4            | 15   | 7.23.13 | 4 R383 | p24 pool 4            | 10   |
| 5.28.13 | 1 R385 | p24 pool 5            | 0    | 5.28.13 | 2 R384 | p24 pool 5            | 5    | 7.23.13 | 3 R388 | p24 pool 5            | 0    | 7.23.13 | 4 R383 | p24 pool 5            | 5    |
| 5.28.13 | 1 R385 | p2/p6/p7 pool 1       | 0    | 5.28.13 | 2 R384 | p2/p6/p7 pool 1       | 0    | 7.23.13 | 3 R388 | p2/p6/p7 pool 1       | 5    | 7.23.13 | 4 R383 | p2/p6/p7 pool 1       | 0    |
| 5.28.13 | 1 R385 | p2/p6/p7 pool 2       | 0    | 5.28.13 | 2 R384 | p2/p6/p7 pool 2       | 0    | 7.23.13 | 3 R388 | p2/p6/p7 pool 2       | 0    | 7.23.13 | 4 R383 | p2/p6/p7 pool 2       | 10   |
| 5.28.13 | 1 R385 | p2/p6/p7 pool 3       | 0    | 5.28.13 | 2 R384 | p2/p6/p7 pool 3       | 5    | 7.23.13 | 3 R388 | p2/p6/p7 pool 3       | 0    | 7.23.13 | 4 R383 | p2/p6/p7 pool 3       | 10   |
| 5.28.13 | 1 R385 | p17 pool 1            | 0    | 5.28.13 | 2 R384 | p17 pool 1            | 0    | 7.23.13 | 3 R388 | p17 pool 1            | 0    | 7.23.13 | 4 R383 | p17 pool 1            | 15   |
| 5.28.13 | 1 R385 | p17 pool 2            | 0    | 5.28.13 | 2 R384 | p17 pool 2            | 5    | 7.23.13 | 3 R388 | p17 pool 2            | 0    | 7.23.13 | 4 R383 | p17 pool 2            | 15   |
| 5.28.13 | 1 R385 | p17 pool 3            | 5    | 5.28.13 | 2 R384 | p17 pool 3            | 0    | 7.23.13 | 3 R388 | p17 pool 3            | 5    | 7.23.13 | 4 R383 | p17 pool 3            | 10   |
| 5.28.13 | 1 R385 | pol pool 1            | 0    | 5.28.13 | 2 R384 | pol pool 1            | 5    | 7.23.13 | 3 R388 | pol pool 1            | 0    | 7.23.13 | 4 R383 | pol pool 1            | 10   |
| 5.28.13 | 1 R385 | pol pool 2            | 25   | 5.28.13 | 2 R384 | pol pool 2            | 0    | 7.23.13 | 3 R388 | pol pool 2            | 30   | 7.23.13 | 4 R383 | pol pool 2            | 480  |
| 5.28.13 | 1 R385 | pol pool 3            | 0    | 5.28.13 | 2 R384 | pol pool 3            | 75   | 7.23.13 | 3 R388 | pol pool 3            | 0    | 7.23.13 | 4 R383 | pol pool 3            | 5    |
| 5.28.13 | 1 R385 | pol pool 4            | 0    | 5.28.13 | 2 R384 | pol pool 4            | 0    | 7.23.13 | 3 R388 | pol pool 4            | 5    | 7.23.13 | 4 R383 | pol pool 4            | 5    |
| 5.28.13 | 1 R385 | nef pool 1            | 0    | 5.28.13 | 2 R384 | nef pool 1            | 10   | 7.23.13 | 3 R388 | nef pool 1            | 0    | 7.23.13 | 4 R383 | nef pool 1            | 5    |
| 5.28.13 | 1 R385 | nef pool 2            | 5    | 5.28.13 | 2 R384 | nef pool 2            | 20   | 7.23.13 | 3 R388 | nef pool 2            | 45   | 7.23.13 | 4 R383 | nef pool 2            | 140  |
| 5.28.13 | 1 R385 | nef pool 3            | 10   | 5.28.13 | 2 R384 | nef pool 3            | 30   | 7.23.13 | 3 R388 | nef pool 3            | 0    | 7.23.13 | 4 R383 | nef pool 3            | 5    |
| 5.28.13 | 1 R385 | hlgG4-HIV5sep         | 0    | 5.28.13 | 2 R384 | hlgG4-HIV5sep         | 0    | 7.23.13 | 3 R388 | hlgG4-HIV5sep         | 0    | 7.23.13 | 4 R383 | hlgG4-HIV5sep         | 0    |
| 5.28.13 | 1 R385 | hlgG4                 | 0    | 5.28.13 | 2 R384 | hlgG4                 | 0    | 7.23.13 | 3 R388 | hlgG4                 | 0    | 7.23.13 | 4 R383 | hlgG4                 | 0    |
| 5.28.13 | 1 R385 | Cohesin-nef66 (C1077) | 0    | 5.28.13 | 2 R384 | Cohesin-nef66 (C1077) | 0    | 7.23.13 | 3 R388 | Cohesin-nef66 (C1077) | 90   | 7.23.13 | 4 R383 | Cohesin-nef66 (C1077) | 25   |
| 5.28.13 | 1 R385 | Cohesin-nef66 (C1078) | 0    | 5.28.13 | 2 R384 | Cohesin-nef66 (C1078) | 0    | 7.23.13 | 3 R388 | Cohesin-nef66 (C1078) | 40   | 7.23.13 | 4 R383 | Cohesin-nef66 (C1078) | 5    |
| 5.28.13 | 1 R385 | Cohesin-gag17         | 0    | 5.28.13 | 2 R384 | Cohesin-gag17         | 5    | 7.23.13 | 3 R388 | Cohesin-gag17         | 10   | 7.23.13 | 4 R383 | Cohesin-gag17         | 15   |
| 5.28.13 | 1 R385 | Cohesin-gag253        | 0    | 5.28.13 | 2 R384 | Cohesin-gag253        | 5    | 7.23.13 | 3 R388 | Cohesin-gag253        | 65   | 7.23.13 | 4 R383 | Cohesin-gag253        | 45   |
| 5.28.13 | 1 R385 | Cohesin-pol158        | 20   | 5.28.13 | 2 R384 | Cohesin-pol158        | 45   | 7.23.13 | 3 R388 | Cohesin-pol158        | 90   | 7.23.13 | 4 R383 | Cohesin-pol158        | 250  |
| 5.28.13 | 1 R385 | Cohesin               | 0    | 5.28.13 | 2 R384 | Cohesin               | 0    | 7.23.13 | 3 R388 | Cohesin               | 0    | 7.23.13 | 4 R383 | Cohesin               | 5    |
| 5.28.13 | 1 R385 | pha                   | 2225 | 5.28.13 | 2 R384 | pha                   | 2970 | 7.23.13 | 3 R388 | pha                   | 2690 | 7.23.13 | 4 R383 | pha                   | 2650 |
| 6.24.13 | 1 R370 | Non                   | 0    | 6.24.13 | 2 R376 | Non                   | 0    | 6.24.13 | 2 R376 | Non                   | 0    | 6.24.13 | 2 R376 | Non                   | 0    |
| 6.24.13 | 1 R370 | p24 pool 1            | 0    | 6.24.13 | 2 R376 | p24 pool 1            | 45   | 6.24.13 | 2 R376 | p24 pool 1            | 45   | 6.24.13 | 2 R376 | p24 pool 1            | 45   |
| 6.24.13 | 1 R370 | p24 pool 2            | 0    | 6.24.13 | 2 R376 | p24 pool 2            | 0    | 6.24.13 | 2 R376 | p24 pool 2            | 0    | 6.24.13 | 2 R376 | p24 pool 2            | 0    |
| 6.24.13 | 1 R370 | p24 pool 3            | 0    | 6.24.13 | 2 R376 | p24 pool 3            | 45   | 6.24.13 | 2 R376 | p24 pool 3            | 45   | 6.24.13 | 2 R376 | p24 pool 3            | 45   |
| 6.24.13 | 1 R370 | p24 pool 4            | 0    | 6.24.13 | 2 R376 | p24 pool 4            | 5    | 6.24.13 | 2 R376 | p24 pool 4            | 5    | 6.24.13 | 2 R376 | p24 pool 4            | 5    |
| 6.24.13 | 1 R370 | p24 pool 5            | 0    | 6.24.13 | 2 R376 | p24 pool 5            | 0    | 6.24.13 | 2 R376 | p24 pool 5            | 0    | 6.24.13 | 2 R376 | p24 pool 5            | 0    |
| 6.24.13 | 1 R370 | p2/p6/p7 pool 1       | 0    | 6.24.13 | 2 R376 | p2/p6/p7 pool 1       | 0    | 6.24.13 | 2 R376 | p2/p6/p7 pool 1       | 0    | 6.24.13 | 2 R376 | p2/p6/p7 pool 1       | 0    |
| 6.24.13 | 1 R370 | p2/p6/p7 pool 2       | 0    | 6.24.13 | 2 R376 | p2/p6/p7 pool 2       | 0    | 6.24.13 | 2 R376 | p2/p6/p7 pool 2       | 0    | 6.24.13 | 2 R376 | p2/p6/p7 pool 2       | 0    |
| 6.24.13 | 1 R370 | p2/p6/p7 pool 3       | 0    | 6.24.13 | 2 R376 | p2/p6/p7 pool 3       | 0    | 6.24.13 | 2 R376 | p2/p6/p7 pool 3       | 0    | 6.24.13 | 2 R376 | p2/p6/p7 pool 3       | 0    |
| 6.24.13 | 1 R370 | p17 pool 1            | 0    | 6.24.13 | 2 R376 | p17 pool 1            | 5    | 6.24.13 | 2 R376 | p17 pool 1            | 5    | 6.24.13 | 2 R376 | p17 pool 1            | 5    |
| 6.24.13 | 1 R370 | p17 pool 2            | 0    | 6.24.13 | 2 R376 | p17 pool 2            | 10   | 6.24.13 | 2 R376 | p17 pool 2            | 10   | 6.24.13 | 2 R376 | p17 pool 2            | 10   |
| 6.24.13 | 1 R370 | p17 pool 3            | 0    | 6.24.13 | 2 R376 | p17 pool 3            | 0    | 6.24.13 | 2 R376 | p17 pool 3            | 0    | 6.24.13 | 2 R376 | p17 pool 3            | 0    |
| 6.24.13 | 1 R370 | pol pool 1            | 0    | 6.24.13 | 2 R376 | pol pool 1            | 0    | 6.24.13 | 2 R376 | pol pool 1            | 0    | 6.24.13 | 2 R376 | pol pool 1            | 0    |
| 6.24.13 | 1 R370 | pol pool 2            | 15   | 6.24.13 | 2 R376 | pol pool 2            | 25   | 6.24.13 | 2 R376 | pol pool 2            | 25   | 6.24.13 | 2 R376 | pol pool 2            | 25   |
| 6.24.13 | 1 R370 | pol pool 3            | 35   | 6.24.13 | 2 R376 | pol pool 3            | 90   | 6.24.13 | 2 R376 | pol pool 3            | 90   | 6.24.13 | 2 R376 | pol pool 3            | 90   |
| 6.24.13 | 1 R370 | pol pool 4            | 0    | 6.24.13 | 2 R376 | pol pool 4            | 0    | 6.24.13 | 2 R376 | pol pool 4            | 0    | 6.24.13 | 2 R376 | pol pool 4            | 0    |
| 6.24.13 | 1 R370 | nef pool 1            | 0    | 6.24.13 | 2 R376 | nef pool 1            | 0    | 6.24.13 | 2 R376 | nef pool 1            | 0    | 6.24.13 | 2 R376 | nef pool 1            | 0    |
| 6.24.13 | 1 R370 | nef pool 2            | 5    | 6.24.13 | 2 R376 | nef pool 2            | 165  | 6.24.13 | 2 R376 | nef pool 2            | 165  | 6.24.13 | 2 R376 | nef pool 2            | 165  |
| 6.24.13 | 1 R370 | nef pool 3            | 0    | 6.24.13 | 2 R376 | nef pool 3            | 105  | 6.24.13 | 2 R376 | nef pool 3            | 105  | 6.24.13 | 2 R376 | nef pool 3            | 105  |
| 6.24.13 | 1 R370 | hlgG4-HIV5sep         | 0    | 6.24.13 | 2 R376 | hlgG4-HIV5sep         | 0    | 6.24.13 | 2 R376 | hlgG4-HIV5sep         | 0    | 6.24.13 | 2 R376 | hlgG4-HIV5sep         | 0    |
| 6.24.13 | 1 R370 | hlgG4                 | 0    | 6.24.13 | 2 R376 | hlgG4                 | 0    | 6.24.13 | 2 R376 | hlgG4                 | 0    | 6.24.13 | 2 R376 | hlgG4                 | 0    |
| 6.24.13 | 1 R370 | Cohesin-nef66 (C1077) | 0    | 6.24.13 | 2 R376 | Cohesin-nef66 (C1077) | 35   | 6.24.13 | 2 R376 | Cohesin-nef66 (C1077) | 35   | 6.24.13 | 2 R376 | Cohesin-nef66 (C1077) | 35   |
| 6.24.13 | 1 R370 | Cohesin-nef66 (C1078) | 0    | 6.24.13 | 2 R376 | Cohesin-nef66 (C1078) | 20   | 6.24.13 | 2 R376 | Cohesin-nef66 (C1078) | 20   | 6.24.13 | 2 R376 | Cohesin-nef66 (C1078) | 20   |
| 6.24.13 | 1 R370 | Cohesin-gag17         | 0    |         |        |                       |      |         |        |                       |      |         |        |                       |      |

|         |        |                       |      |         |        |                       |      |
|---------|--------|-----------------------|------|---------|--------|-----------------------|------|
| 6.24.13 | 1 R371 | p2/p6/p7 pool 1       | 5    | 6.24.13 | 2 R377 | p2/p6/p7 pool 1       | 5    |
| 6.24.13 | 1 R371 | p2/p6/p7 pool 2       | 0    | 6.24.13 | 2 R377 | p2/p6/p7 pool 2       | 0    |
| 6.24.13 | 1 R371 | p2/p6/p7 pool 3       | 0    | 6.24.13 | 2 R377 | p2/p6/p7 pool 3       | 0    |
| 6.24.13 | 1 R371 | p17 pool 1            | 0    | 6.24.13 | 2 R377 | p17 pool 1            | 5    |
| 6.24.13 | 1 R371 | p17 pool 2            | 0    | 6.24.13 | 2 R377 | p17 pool 2            | 10   |
| 6.24.13 | 1 R371 | p17 pool 3            | 0    | 6.24.13 | 2 R377 | p17 pool 3            | 0    |
| 6.24.13 | 1 R371 | pol pool 1            | 0    | 6.24.13 | 2 R377 | pol pool 1            | 0    |
| 6.24.13 | 1 R371 | pol pool 2            | 455  | 6.24.13 | 2 R377 | pol pool 2            | 1480 |
| 6.24.13 | 1 R371 | pol pool 3            | 0    | 6.24.13 | 2 R377 | pol pool 3            | 20   |
| 6.24.13 | 1 R371 | pol pool 4            | 0    | 6.24.13 | 2 R377 | pol pool 4            | 0    |
| 6.24.13 | 1 R371 | nef pool 1            | 0    | 6.24.13 | 2 R377 | nef pool 1            | 0    |
| 6.24.13 | 1 R371 | nef pool 2            | 55   | 6.24.13 | 2 R377 | nef pool 2            | 90   |
| 6.24.13 | 1 R371 | nef pool 3            | 10   | 6.24.13 | 2 R377 | nef pool 3            | 25   |
| 6.24.13 | 1 R371 | hlgG4-HIV5sep         | 0    | 6.24.13 | 2 R377 | hlgG4-HIV5sep         | 0    |
| 6.24.13 | 1 R371 | hlgG4                 | 0    | 6.24.13 | 2 R377 | hlgG4                 | 0    |
| 6.24.13 | 1 R371 | Cohesin-nef66 (C1077) | 10   | 6.24.13 | 2 R377 | Cohesin-nef66 (C1077) | 0    |
| 6.24.13 | 1 R371 | Cohesin-nef66 (C1078) | 5    | 6.24.13 | 2 R377 | Cohesin-nef66 (C1078) | 0    |
| 6.24.13 | 1 R371 | Cohesin-gag17         | 0    | 6.24.13 | 2 R377 | Cohesin-gag17         | 10   |
| 6.24.13 | 1 R371 | Cohesin-gag253        | 15   | 6.24.13 | 2 R377 | Cohesin-gag253        | 50   |
| 6.24.13 | 1 R371 | Cohesin-pol158        | 280  | 6.24.13 | 2 R377 | Cohesin-pol158        | 1255 |
| 6.24.13 | 1 R371 | Cohesin               | 10   | 6.24.13 | 2 R377 | Cohesin               | 5    |
| 6.24.13 | 1 R371 | pha                   | 2750 | 6.24.13 | 2 R377 | pha                   | 2990 |
| 6.24.13 | 1 R373 | Non                   | 0    | 6.24.13 | 2 R378 | Non                   | 0    |
| 6.24.13 | 1 R373 | p24 pool 1            | 0    | 6.24.13 | 2 R378 | p24 pool 1            | 20   |
| 6.24.13 | 1 R373 | p24 pool 2            | 5    | 6.24.13 | 2 R378 | p24 pool 2            | 15   |
| 6.24.13 | 1 R373 | p24 pool 3            | 60   | 6.24.13 | 2 R378 | p24 pool 3            | 145  |
| 6.24.13 | 1 R373 | p24 pool 4            | 0    | 6.24.13 | 2 R378 | p24 pool 4            | 15   |
| 6.24.13 | 1 R373 | p24 pool 5            | 5    | 6.24.13 | 2 R378 | p24 pool 5            | 5    |
| 6.24.13 | 1 R373 | p2/p6/p7 pool 1       | 5    | 6.24.13 | 2 R378 | p2/p6/p7 pool 1       | 5    |
| 6.24.13 | 1 R373 | p2/p6/p7 pool 2       | 0    | 6.24.13 | 2 R378 | p2/p6/p7 pool 2       | 5    |
| 6.24.13 | 1 R373 | p2/p6/p7 pool 3       | 0    | 6.24.13 | 2 R378 | p2/p6/p7 pool 3       | 0    |
| 6.24.13 | 1 R373 | p17 pool 1            | 5    | 6.24.13 | 2 R378 | p17 pool 1            | 0    |
| 6.24.13 | 1 R373 | p17 pool 2            | 0    | 6.24.13 | 2 R378 | p17 pool 2            | 10   |
| 6.24.13 | 1 R373 | p17 pool 3            | 0    | 6.24.13 | 2 R378 | p17 pool 3            | 10   |
| 6.24.13 | 1 R373 | pol pool 1            | 0    | 6.24.13 | 2 R378 | pol pool 1            | 0    |
| 6.24.13 | 1 R373 | pol pool 2            | 0    | 6.24.13 | 2 R378 | pol pool 2            | 800  |
| 6.24.13 | 1 R373 | pol pool 3            | 0    | 6.24.13 | 2 R378 | pol pool 3            | 30   |
| 6.24.13 | 1 R373 | pol pool 4            | 0    | 6.24.13 | 2 R378 | pol pool 4            | 5    |
| 6.24.13 | 1 R373 | nef pool 1            | 0    | 6.24.13 | 2 R378 | nef pool 1            | 5    |
| 6.24.13 | 1 R373 | nef pool 2            | 55   | 6.24.13 | 2 R378 | nef pool 2            | 65   |
| 6.24.13 | 1 R373 | nef pool 3            | 10   | 6.24.13 | 2 R378 | nef pool 3            | 5    |
| 6.24.13 | 1 R373 | hlgG4-HIV5sep         | 0    | 6.24.13 | 2 R378 | hlgG4-HIV5sep         | 0    |
| 6.24.13 | 1 R373 | hlgG4                 | 0    | 6.24.13 | 2 R378 | hlgG4                 | 0    |
| 6.24.13 | 1 R373 | Cohesin-nef66 (C1077) | 0    | 6.24.13 | 2 R378 | Cohesin-nef66 (C1077) | 40   |
| 6.24.13 | 1 R373 | Cohesin-nef66 (C1078) | 5    | 6.24.13 | 2 R378 | Cohesin-nef66 (C1078) | 20   |
| 6.24.13 | 1 R373 | Cohesin-gag17         | 0    | 6.24.13 | 2 R378 | Cohesin-gag17         | 20   |
| 6.24.13 | 1 R373 | Cohesin-gag253        | 90   | 6.24.13 | 2 R378 | Cohesin-gag253        | 45   |
| 6.24.13 | 1 R373 | Cohesin-pol158        | 25   | 6.24.13 | 2 R378 | Cohesin-pol158        | 700  |
| 6.24.13 | 1 R373 | Cohesin               | 5    | 6.24.13 | 2 R378 | Cohesin               | 0    |
| 6.24.13 | 1 R373 | pha                   | 2555 | 6.24.13 | 2 R378 | pha                   | 2975 |
| 6.24.13 | 1 R374 | Non                   | 0    | 6.24.13 | 2 R380 | Non                   | 0    |
| 6.24.13 | 1 R374 | p24 pool 1            | 0    | 6.24.13 | 2 R380 | p24 pool 1            | 10   |
| 6.24.13 | 1 R374 | p24 pool 2            | 10   | 6.24.13 | 2 R380 | p24 pool 2            | 15   |
| 6.24.13 | 1 R374 | p24 pool 3            | 285  | 6.24.13 | 2 R380 | p24 pool 3            | 490  |
| 6.24.13 | 1 R374 | p24 pool 4            | 40   | 6.24.13 | 2 R380 | p24 pool 4            | 20   |
| 6.24.13 | 1 R374 | p24 pool 5            | 0    | 6.24.13 | 2 R380 | p24 pool 5            | 5    |
| 6.24.13 | 1 R374 | p2/p6/p7 pool 1       | 0    | 6.24.13 | 2 R380 | p2/p6/p7 pool 1       | 15   |
| 6.24.13 | 1 R374 | p2/p6/p7 pool 2       | 0    | 6.24.13 | 2 R380 | p2/p6/p7 pool 2       | 5    |
| 6.24.13 | 1 R374 | p2/p6/p7 pool 3       | 0    | 6.24.13 | 2 R380 | p2/p6/p7 pool 3       | 15   |
| 6.24.13 | 1 R374 | p17 pool 1            | 0    | 6.24.13 | 2 R380 | p17 pool 1            | 10   |
| 6.24.13 | 1 R374 | p17 pool 2            | 0    | 6.24.13 | 2 R380 | p17 pool 2            | 10   |
| 6.24.13 | 1 R374 | p17 pool 3            | 0    | 6.24.13 | 2 R380 | p17 pool 3            | 5    |
| 6.24.13 | 1 R374 | pol pool 1            | 0    | 6.24.13 | 2 R380 | pol pool 1            | 5    |
| 6.24.13 | 1 R374 | pol pool 2            | 5    | 6.24.13 | 2 R380 | pol pool 2            | 70   |
| 6.24.13 | 1 R374 | pol pool 3            | 0    | 6.24.13 | 2 R380 | pol pool 3            | 50   |
| 6.24.13 | 1 R374 | pol pool 4            | 0    | 6.24.13 | 2 R380 | pol pool 4            | 10   |
| 6.24.13 | 1 R374 | nef pool 1            | 0    | 6.24.13 | 2 R380 | nef pool 1            | 0    |
| 6.24.13 | 1 R374 | nef pool 2            | 45   | 6.24.13 | 2 R380 | nef pool 2            | 155  |
| 6.24.13 | 1 R374 | nef pool 3            | 5    | 6.24.13 | 2 R380 | nef pool 3            | 130  |
| 6.24.13 | 1 R374 | hlgG4-HIV5sep         | 0    | 6.24.13 | 2 R380 | hlgG4-HIV5sep         | 0    |
| 6.24.13 | 1 R374 | hlgG4                 | 0    | 6.24.13 | 2 R380 | hlgG4                 | 0    |
| 6.24.13 | 1 R374 | Cohesin-nef66 (C1077) | 0    | 6.24.13 | 2 R380 | Cohesin-nef66 (C1077) | 15   |
| 6.24.13 | 1 R374 | Cohesin-nef66 (C1078) | 0    | 6.24.13 | 2 R380 | Cohesin-nef66 (C1078) | 25   |
| 6.24.13 | 1 R374 | Cohesin-gag17         | 0    | 6.24.13 | 2 R380 | Cohesin-gag17         | 0    |
| 6.24.13 | 1 R374 | Cohesin-gag253        | 145  | 6.24.13 | 2 R380 | Cohesin-gag253        | 225  |
| 6.24.13 | 1 R374 | Cohesin-pol158        | 5    | 6.24.13 | 2 R380 | Cohesin-pol158        | 20   |
| 6.24.13 | 1 R374 | Cohesin               | 0    | 6.24.13 | 2 R380 | Cohesin               | 0    |
| 6.24.13 | 1 R374 | pha                   | 2840 | 6.24.13 | 2 R380 | pha                   | 2160 |
| 6.24.13 | 1 R369 | Non                   | 0    | 6.24.13 | 2 R382 | Non                   | 0    |
| 6.24.13 | 1 R369 | p24 pool 1            | 5    | 6.24.13 | 2 R382 | p24 pool 1            | 10   |
| 6.24.13 | 1 R369 | p24 pool 2            | 100  | 6.24.13 | 2 R382 | p24 pool 2            | 15   |
| 6.24.13 | 1 R369 | p24 pool 3            | 765  | 6.24.13 | 2 R382 | p24 pool 3            | 130  |
| 6.24.13 | 1 R369 | p24 pool 4            | 15   | 6.24.13 | 2 R382 | p24 pool 4            | 130  |
| 6.24.13 | 1 R369 | p24 pool 5            | 0    | 6.24.13 | 2 R382 | p24 pool 5            | 0    |
| 6.24.13 | 1 R369 | p2/p6/p7 pool 1       | 5    | 6.24.13 | 2 R382 | p2/p6/p7 pool 1       | 5    |
| 6.24.13 | 1 R369 | p2/p6/p7 pool 2       | 15   | 6.24.13 | 2 R382 | p2/p6/p7 pool 2       | 0    |
| 6.24.13 | 1 R369 | p2/p6/p7 pool 3       | 10   | 6.24.13 | 2 R382 | p2/p6/p7 pool 3       | 0    |
| 6.24.13 | 1 R369 | p17 pool 1            | 30   | 6.24.13 | 2 R382 | p17 pool 1            | 5    |

|         |        |                       |      |         |        |                       |      |
|---------|--------|-----------------------|------|---------|--------|-----------------------|------|
| 6.24.13 | 1 R369 | p17 pool 2            | 0    | 6.24.13 | 2 R382 | p17 pool 2            | 5    |
| 6.24.13 | 1 R369 | p17 pool 3            | 10   | 6.24.13 | 2 R382 | p17 pool 3            | 0    |
| 6.24.13 | 1 R369 | pol pool 1            | 0    | 6.24.13 | 2 R382 | pol pool 1            | 0    |
| 6.24.13 | 1 R369 | pol pool 2            | 25   | 6.24.13 | 2 R382 | pol pool 2            | 60   |
| 6.24.13 | 1 R369 | pol pool 3            | 5    | 6.24.13 | 2 R382 | pol pool 3            | 520  |
| 6.24.13 | 1 R369 | pol pool 4            | 5    | 6.24.13 | 2 R382 | pol pool 4            | 0    |
| 6.24.13 | 1 R369 | nef pool 1            | 0    | 6.24.13 | 2 R382 | nef pool 1            | 0    |
| 6.24.13 | 1 R369 | nef pool 2            | 770  | 6.24.13 | 2 R382 | nef pool 2            | 175  |
| 6.24.13 | 1 R369 | nef pool 3            | 30   | 6.24.13 | 2 R382 | nef pool 3            | 15   |
| 6.24.13 | 1 R369 | hlgG4-HIV5pep         | 0    | 6.24.13 | 2 R382 | hlgG4-HIV5pep         | 0    |
| 6.24.13 | 1 R369 | hlgG4                 | 0    | 6.24.13 | 2 R382 | hlgG4                 | 0    |
| 6.24.13 | 1 R369 | Cohesin-nef66 (C1077) | 180  | 6.24.13 | 2 R382 | Cohesin-nef66 (C1077) | 20   |
| 6.24.13 | 1 R369 | Cohesin-nef66 (C1078) | 0    | 6.24.13 | 2 R382 | Cohesin-nef66 (C1078) | 0    |
| 6.24.13 | 1 R369 | Cohesin-gag17         | 0    | 6.24.13 | 2 R382 | Cohesin-gag17         | 5    |
| 6.24.13 | 1 R369 | Cohesin-gag253        | 540  | 6.24.13 | 2 R382 | Cohesin-gag253        | 55   |
| 6.24.13 | 1 R369 | Cohesin-pol158        | 20   | 6.24.13 | 2 R382 | Cohesin-pol158        | 360  |
| 6.24.13 | 1 R369 | Cohesin               | 0    | 6.24.13 | 2 R382 | Cohesin               | 0    |
| 6.24.13 | 1 R369 | pha                   | 3365 | 6.24.13 | 2 R382 | pha                   | 3010 |
| 6.24.13 | 1 R385 | Non                   | 0    | 6.24.13 | 2 R384 | Non                   | 0    |
| 6.24.13 | 1 R385 | p24 pool 1            | 0    | 6.24.13 | 2 R384 | p24 pool 1            | 15   |
| 6.24.13 | 1 R385 | p24 pool 2            | 15   | 6.24.13 | 2 R384 | p24 pool 2            | 25   |
| 6.24.13 | 1 R385 | p24 pool 3            | 20   | 6.24.13 | 2 R384 | p24 pool 3            | 120  |
| 6.24.13 | 1 R385 | p24 pool 4            | 130  | 6.24.13 | 2 R384 | p24 pool 4            | 80   |
| 6.24.13 | 1 R385 | p24 pool 5            | 10   | 6.24.13 | 2 R384 | p24 pool 5            | 5    |
| 6.24.13 | 1 R385 | p2/p6/p7 pool 1       | 5    | 6.24.13 | 2 R384 | p2/p6/p7 pool 1       | 0    |
| 6.24.13 | 1 R385 | p2/p6/p7 pool 2       | 15   | 6.24.13 | 2 R384 | p2/p6/p7 pool 2       | 10   |
| 6.24.13 | 1 R385 | p2/p6/p7 pool 3       | 0    | 6.24.13 | 2 R384 | p2/p6/p7 pool 3       | 15   |
| 6.24.13 | 1 R385 | p17 pool 1            | 10   | 6.24.13 | 2 R384 | p17 pool 1            | 5    |
| 6.24.13 | 1 R385 | p17 pool 2            | 5    | 6.24.13 | 2 R384 | p17 pool 2            | 10   |
| 6.24.13 | 1 R385 | p17 pool 3            | 0    | 6.24.13 | 2 R384 | p17 pool 3            | 0    |
| 6.24.13 | 1 R385 | pol pool 1            | 0    | 6.24.13 | 2 R384 | pol pool 1            | 0    |
| 6.24.13 | 1 R385 | pol pool 2            | 460  | 6.24.13 | 2 R384 | pol pool 2            | 5    |
| 6.24.13 | 1 R385 | pol pool 3            | 0    | 6.24.13 | 2 R384 | pol pool 3            | 90   |
| 6.24.13 | 1 R385 | pol pool 4            | 0    | 6.24.13 | 2 R384 | pol pool 4            | 0    |
| 6.24.13 | 1 R385 | nef pool 1            | 0    | 6.24.13 | 2 R384 | nef pool 1            | 0    |
| 6.24.13 | 1 R385 | nef pool 2            | 50   | 6.24.13 | 2 R384 | nef pool 2            | 90   |
| 6.24.13 | 1 R385 | nef pool 3            | 0    | 6.24.13 | 2 R384 | nef pool 3            | 15   |
| 6.24.13 | 1 R385 | hlgG4-HIV5pep         | 0    | 6.24.13 | 2 R384 | hlgG4-HIV5pep         | 0    |
| 6.24.13 | 1 R385 | hlgG4                 | 0    | 6.24.13 | 2 R384 | hlgG4                 | 0    |
| 6.24.13 | 1 R385 | Cohesin-nef66 (C1077) | 15   | 6.24.13 | 2 R384 | Cohesin-nef66 (C1077) | 5    |
| 6.24.13 | 1 R385 | Cohesin-nef66 (C1078) | 5    | 6.24.13 | 2 R384 | Cohesin-nef66 (C1078) | 10   |
| 6.24.13 | 1 R385 | Cohesin-gag17         | 5    | 6.24.13 | 2 R384 | Cohesin-gag17         | 5    |
| 6.24.13 | 1 R385 | Cohesin-gag253        | 25   | 6.24.13 | 2 R384 | Cohesin-gag253        | 35   |
| 6.24.13 | 1 R385 | Cohesin-pol158        | 120  | 6.24.13 | 2 R384 | Cohesin-pol158        | 25   |
| 6.24.13 | 1 R385 | Cohesin               | 5    | 6.24.13 | 2 R384 | Cohesin               | 0    |
| 6.24.13 | 1 R385 | pha                   | 1890 | 6.24.13 | 2 R384 | pha                   | 2430 |
